# Supplementary material for: Bacterial Nomenclature in the Era of Genomics
Source: Preprints.org preprint supplement (doi:10.20944/preprints202107.0546.v1), 2021-07-23
Supplement: Supplementary file 3 [file supplementary]

## Sheet: Arbitrary names
Regeniquia	fem. n.	A word arbitrarily created as the name of a bacterial genus	0.229222
Bathretica	fem. n.	A word arbitrarily created as the name of a bacterial genus	0.104158
Carthellio	fem. n.	A word arbitrarily created as the name of a bacterial genus	0.441528
Ebiscellio	fem. n.	A word arbitrarily created as the name of a bacterial genus	0.690115
Arielentia	fem. n.	A word arbitrarily created as the name of a bacterial genus	0.521021
Arnuseptis	fem. n.	A word arbitrarily created as the name of a bacterial genus	0.329525
Acrufeptis	fem. n.	A word arbitrarily created as the name of a bacterial genus	0.986143
Ubiusellio	fem. n.	A word arbitrarily created as the name of a bacterial genus	0.335502
Fanalascua	fem. n.	A word arbitrarily created as the name of a bacterial genus	0.55079
Femeladema	fem. n.	A word arbitrarily created as the name of a bacterial genus	0.0240995
Naeniquia	fem. n.	A word arbitrarily created as the name of a bacterial genus	0.331164
Inhonorea	fem. n.	A word arbitrarily created as the name of a bacterial genus	0.708394
Siruporea	fem. n.	A word arbitrarily created as the name of a bacterial genus	0.320997
Ophitiquia	fem. n.	A word arbitrarily created as the name of a bacterial genus	0.27584
Viteliquia	fem. n.	A word arbitrarily created as the name of a bacterial genus	0.707746
Dijudectio	fem. n.	A word arbitrarily created as the name of a bacterial genus	0.230941
Arrogagena	fem. n.	A word arbitrarily created as the name of a bacterial genus	0.35584
Linosella	fem. n.	A word arbitrarily created as the name of a bacterial genus	0.400391
Eclecatrix	fem. n.	A word arbitrarily created as the name of a bacterial genus	0.538231
Bonasaria	fem. n.	A word arbitrarily created as the name of a bacterial genus	0.95053
Zizipella	fem. n.	A word arbitrarily created as the name of a bacterial genus	0.427406
Nunciaria	fem. n.	A word arbitrarily created as the name of a bacterial genus	0.233945
Vaginascua	fem. n.	A word arbitrarily created as the name of a bacterial genus	0.648022
Esculitas	fem. n.	A word arbitrarily created as the name of a bacterial genus	0.479415
Orestectio	fem. n.	A word arbitrarily created as the name of a bacterial genus	0.517936
Lapatitas	fem. n.	A word arbitrarily created as the name of a bacterial genus	0.143795
Pinusetica	fem. n.	A word arbitrarily created as the name of a bacterial genus	0.780128
Milesilago	fem. n.	A word arbitrarily created as the name of a bacterial genus	0.634266
Positarisa	fem. n.	A word arbitrarily created as the name of a bacterial genus	0.14457
Absyniquia	fem. n.	A word arbitrarily created as the name of a bacterial genus	0.191238
Gasalicula	fem. n.	A word arbitrarily created as the name of a bacterial genus	0.885604
Ablacatrix	fem. n.	A word arbitrarily created as the name of a bacterial genus	0.939564
Crueneptis	fem. n.	A word arbitrarily created as the name of a bacterial genus	0.000820596
Abnoradema	fem. n.	A word arbitrarily created as the name of a bacterial genus	0.335567
Mateleptis	fem. n.	A word arbitrarily created as the name of a bacterial genus	0.00651598
Altoritas	fem. n.	A word arbitrarily created as the name of a bacterial genus	0.619527
Truncectio	fem. n.	A word arbitrarily created as the name of a bacterial genus	0.957652
Pharmiquia	fem. n.	A word arbitrarily created as the name of a bacterial genus	0.9589
Fausarisa	fem. n.	A word arbitrarily created as the name of a bacterial genus	0.227187
Biosparia	fem. n.	A word arbitrarily created as the name of a bacterial genus	0.177964
Bisaceptis	fem. n.	A word arbitrarily created as the name of a bacterial genus	0.298996
Rigeneptis	fem. n.	A word arbitrarily created as the name of a bacterial genus	0.916798
Epogdagena	fem. n.	A word arbitrarily created as the name of a bacterial genus	0.879492
Sistradema	fem. n.	A word arbitrarily created as the name of a bacterial genus	0.92071
Omissitudo	fem. n.	A word arbitrarily created as the name of a bacterial genus	0.559915
Ditonicula	fem. n.	A word arbitrarily created as the name of a bacterial genus	0.463742
Ricinaphia	fem. n.	A word arbitrarily created as the name of a bacterial genus	0.185186
Ectenia	fem. n.	A word arbitrarily created as the name of a bacterial genus	0.199432
Ampelentia	fem. n.	A word arbitrarily created as the name of a bacterial genus	0.869103
Alticactea	fem. n.	A word arbitrarily created as the name of a bacterial genus	0.889615
Nympheptis	fem. n.	A word arbitrarily created as the name of a bacterial genus	0.907006
Insubagena	fem. n.	A word arbitrarily created as the name of a bacterial genus	0.282427
Triobactea	fem. n.	A word arbitrarily created as the name of a bacterial genus	0.812627
Comiaicula	fem. n.	A word arbitrarily created as the name of a bacterial genus	0.413129
Cunctascua	fem. n.	A word arbitrarily created as the name of a bacterial genus	0.0649884
Venaborea	fem. n.	A word arbitrarily created as the name of a bacterial genus	0.0989813
Frusteptis	fem. n.	A word arbitrarily created as the name of a bacterial genus	0.963228
Prothella	fem. n.	A word arbitrarily created as the name of a bacterial genus	0.966944
Ensicactea	fem. n.	A word arbitrarily created as the name of a bacterial genus	0.0354875
Odollascua	fem. n.	A word arbitrarily created as the name of a bacterial genus	0.918655
Orienutela	fem. n.	A word arbitrarily created as the name of a bacterial genus	0.645802
Acentatrix	fem. n.	A word arbitrarily created as the name of a bacterial genus	0.0570825
Absocorea	fem. n.	A word arbitrarily created as the name of a bacterial genus	0.886036
Varicetica	fem. n.	A word arbitrarily created as the name of a bacterial genus	0.218227
Tetanaria	fem. n.	A word arbitrarily created as the name of a bacterial genus	0.120834
Visocetica	fem. n.	A word arbitrarily created as the name of a bacterial genus	0.760462
Execretica	fem. n.	A word arbitrarily created as the name of a bacterial genus	0.12409
Dubitellio	fem. n.	A word arbitrarily created as the name of a bacterial genus	0.305989
Holocicula	fem. n.	A word arbitrarily created as the name of a bacterial genus	0.230935
Ulcerorea	fem. n.	A word arbitrarily created as the name of a bacterial genus	0.969554
Aruspatrix	fem. n.	A word arbitrarily created as the name of a bacterial genus	0.110668
Papulutela	fem. n.	A word arbitrarily created as the name of a bacterial genus	0.412645
Setthiquia	fem. n.	A word arbitrarily created as the name of a bacterial genus	0.429809
Cujasagena	fem. n.	A word arbitrarily created as the name of a bacterial genus	0.327383
Pyrenia	fem. n.	A word arbitrarily created as the name of a bacterial genus	0.89176
Pabulascua	fem. n.	A word arbitrarily created as the name of a bacterial genus	0.384633
Nobiliquia	fem. n.	A word arbitrarily created as the name of a bacterial genus	0.528725
Aetiteptis	fem. n.	A word arbitrarily created as the name of a bacterial genus	0.694737
Deambia	fem. n.	A word arbitrarily created as the name of a bacterial genus	0.746294
Felonadema	fem. n.	A word arbitrarily created as the name of a bacterial genus	0.522431
Comosaphia	fem. n.	A word arbitrarily created as the name of a bacterial genus	0.0365153
Gazelagena	fem. n.	A word arbitrarily created as the name of a bacterial genus	0.180089
Coempadema	fem. n.	A word arbitrarily created as the name of a bacterial genus	0.127306
Hederarisa	fem. n.	A word arbitrarily created as the name of a bacterial genus	0.822379
Appulilago	fem. n.	A word arbitrarily created as the name of a bacterial genus	0.694502
Adagnaria	fem. n.	A word arbitrarily created as the name of a bacterial genus	0.630963
Proegagena	fem. n.	A word arbitrarily created as the name of a bacterial genus	0.413024
Lustretica	fem. n.	A word arbitrarily created as the name of a bacterial genus	0.97762
Nehaladema	fem. n.	A word arbitrarily created as the name of a bacterial genus	0.404254
Ulterorea	fem. n.	A word arbitrarily created as the name of a bacterial genus	0.636563
Annalutela	fem. n.	A word arbitrarily created as the name of a bacterial genus	0.393132
Mutularia	fem. n.	A word arbitrarily created as the name of a bacterial genus	0.937177
Deunxaria	fem. n.	A word arbitrarily created as the name of a bacterial genus	0.0931269
Aucilatrix	fem. n.	A word arbitrarily created as the name of a bacterial genus	0.485478
Merulentia	fem. n.	A word arbitrarily created as the name of a bacterial genus	0.299563
Livoragena	fem. n.	A word arbitrarily created as the name of a bacterial genus	0.239014
Romphadema	fem. n.	A word arbitrarily created as the name of a bacterial genus	0.753652
Kalenatrix	fem. n.	A word arbitrarily created as the name of a bacterial genus	0.174456
Romphella	fem. n.	A word arbitrarily created as the name of a bacterial genus	0.630078
Choicella	fem. n.	A word arbitrarily created as the name of a bacterial genus	0.982075
Lubidellio	fem. n.	A word arbitrarily created as the name of a bacterial genus	0.947365
Furaxorea	fem. n.	A word arbitrarily created as the name of a bacterial genus	0.52402
Ardifeptis	fem. n.	A word arbitrarily created as the name of a bacterial genus	0.828313
Daviditudo	fem. n.	A word arbitrarily created as the name of a bacterial genus	0.0374939
Rastretica	fem. n.	A word arbitrarily created as the name of a bacterial genus	0.843802
Catulutela	fem. n.	A word arbitrarily created as the name of a bacterial genus	0.368277
Ignobitudo	fem. n.	A word arbitrarily created as the name of a bacterial genus	0.513325
Ascopetica	fem. n.	A word arbitrarily created as the name of a bacterial genus	0.266592
Venucellio	fem. n.	A word arbitrarily created as the name of a bacterial genus	0.727609
Moechentia	fem. n.	A word arbitrarily created as the name of a bacterial genus	0.316552
Avorsicula	fem. n.	A word arbitrarily created as the name of a bacterial genus	0.921584
Dijudarisa	fem. n.	A word arbitrarily created as the name of a bacterial genus	0.13156
Coincicula	fem. n.	A word arbitrarily created as the name of a bacterial genus	0.611906
Nicetagena	fem. n.	A word arbitrarily created as the name of a bacterial genus	0.405901
Regalitudo	fem. n.	A word arbitrarily created as the name of a bacterial genus	0.240714
Bilanadema	fem. n.	A word arbitrarily created as the name of a bacterial genus	0.710395
Apronilago	fem. n.	A word arbitrarily created as the name of a bacterial genus	0.852206
Coillentia	fem. n.	A word arbitrarily created as the name of a bacterial genus	0.385734
Delpharisa	fem. n.	A word arbitrarily created as the name of a bacterial genus	0.169828
Diphricula	fem. n.	A word arbitrarily created as the name of a bacterial genus	0.508906
Ammociquia	fem. n.	A word arbitrarily created as the name of a bacterial genus	0.88322
Relegellio	fem. n.	A word arbitrarily created as the name of a bacterial genus	0.619491
Mucusilago	fem. n.	A word arbitrarily created as the name of a bacterial genus	0.36055
Madiditas	fem. n.	A word arbitrarily created as the name of a bacterial genus	0.924388
Parilicula	fem. n.	A word arbitrarily created as the name of a bacterial genus	0.34239
Deruparia	fem. n.	A word arbitrarily created as the name of a bacterial genus	0.384441
Ellebentia	fem. n.	A word arbitrarily created as the name of a bacterial genus	0.198868
Cryptatrix	fem. n.	A word arbitrarily created as the name of a bacterial genus	0.734923
Psychia	fem. n.	A word arbitrarily created as the name of a bacterial genus	0.250977
Accubectio	fem. n.	A word arbitrarily created as the name of a bacterial genus	0.0226183
Necopitas	fem. n.	A word arbitrarily created as the name of a bacterial genus	0.106936
Myxaitas	fem. n.	A word arbitrarily created as the name of a bacterial genus	0.177341
Batalutela	fem. n.	A word arbitrarily created as the name of a bacterial genus	0.616527
Scillitudo	fem. n.	A word arbitrarily created as the name of a bacterial genus	0.687551
Diarrorea	fem. n.	A word arbitrarily created as the name of a bacterial genus	0.120816
Taoractea	fem. n.	A word arbitrarily created as the name of a bacterial genus	0.731112
Prompaphia	fem. n.	A word arbitrarily created as the name of a bacterial genus	0.854669
Ligamaphia	fem. n.	A word arbitrarily created as the name of a bacterial genus	0.500417
Cluaceptis	fem. n.	A word arbitrarily created as the name of a bacterial genus	0.83945
Lagunitas	fem. n.	A word arbitrarily created as the name of a bacterial genus	0.0966069
Venabitas	fem. n.	A word arbitrarily created as the name of a bacterial genus	0.523751
Rhythitudo	fem. n.	A word arbitrarily created as the name of a bacterial genus	0.000787067
Sepulentia	fem. n.	A word arbitrarily created as the name of a bacterial genus	0.771716
Perflentia	fem. n.	A word arbitrarily created as the name of a bacterial genus	0.603709
Hyaenagena	fem. n.	A word arbitrarily created as the name of a bacterial genus	0.0914645
Botelia	fem. n.	A word arbitrarily created as the name of a bacterial genus	0.856524
Oblecutela	fem. n.	A word arbitrarily created as the name of a bacterial genus	0.368822
Coilliquia	fem. n.	A word arbitrarily created as the name of a bacterial genus	0.378353
Cnestectio	fem. n.	A word arbitrarily created as the name of a bacterial genus	0.677139
Sorexagena	fem. n.	A word arbitrarily created as the name of a bacterial genus	0.797609
Tutamicula	fem. n.	A word arbitrarily created as the name of a bacterial genus	0.468658
Agellatrix	fem. n.	A word arbitrarily created as the name of a bacterial genus	0.540412
Ignaraphia	fem. n.	A word arbitrarily created as the name of a bacterial genus	0.650336
Ficulentia	fem. n.	A word arbitrarily created as the name of a bacterial genus	0.913981
Dyseneptis	fem. n.	A word arbitrarily created as the name of a bacterial genus	0.482408
Restretica	fem. n.	A word arbitrarily created as the name of a bacterial genus	0.087837
Falariquia	fem. n.	A word arbitrarily created as the name of a bacterial genus	0.879861
Dehonicula	fem. n.	A word arbitrarily created as the name of a bacterial genus	0.0239765
Emmanutela	fem. n.	A word arbitrarily created as the name of a bacterial genus	0.665906
Ilictia	fem. n.	A word arbitrarily created as the name of a bacterial genus	0.930188
Repagarisa	fem. n.	A word arbitrarily created as the name of a bacterial genus	0.893193
Quianectio	fem. n.	A word arbitrarily created as the name of a bacterial genus	0.737264
Mulinactea	fem. n.	A word arbitrarily created as the name of a bacterial genus	0.531775
Pecoritudo	fem. n.	A word arbitrarily created as the name of a bacterial genus	0.29358
Paginitudo	fem. n.	A word arbitrarily created as the name of a bacterial genus	0.490929
Lupinaria	fem. n.	A word arbitrarily created as the name of a bacterial genus	0.868169
Cohibactea	fem. n.	A word arbitrarily created as the name of a bacterial genus	0.190384
Sutilia	fem. n.	A word arbitrarily created as the name of a bacterial genus	0.405954
Echidaphia	fem. n.	A word arbitrarily created as the name of a bacterial genus	0.594276
Polemectio	fem. n.	A word arbitrarily created as the name of a bacterial genus	0.772721
Aulaxaria	fem. n.	A word arbitrarily created as the name of a bacterial genus	0.237522
Scienetica	fem. n.	A word arbitrarily created as the name of a bacterial genus	0.545691
Vasaratrix	fem. n.	A word arbitrarily created as the name of a bacterial genus	0.451247
Albamaphia	fem. n.	A word arbitrarily created as the name of a bacterial genus	0.694483
Crebrorea	fem. n.	A word arbitrarily created as the name of a bacterial genus	0.283117
Diarria	fem. n.	A word arbitrarily created as the name of a bacterial genus	0.341759
Ortygectio	fem. n.	A word arbitrarily created as the name of a bacterial genus	0.68621
Expugascua	fem. n.	A word arbitrarily created as the name of a bacterial genus	0.189087
Stillagena	fem. n.	A word arbitrarily created as the name of a bacterial genus	0.177177
Uberticula	fem. n.	A word arbitrarily created as the name of a bacterial genus	0.309757
Ustoriquia	fem. n.	A word arbitrarily created as the name of a bacterial genus	0.353477
Cicaagena	fem. n.	A word arbitrarily created as the name of a bacterial genus	0.903656
Auxilactea	fem. n.	A word arbitrarily created as the name of a bacterial genus	0.174944
Subobentia	fem. n.	A word arbitrarily created as the name of a bacterial genus	0.482783
Devocorea	fem. n.	A word arbitrarily created as the name of a bacterial genus	0.479585
Abpatia	fem. n.	A word arbitrarily created as the name of a bacterial genus	0.644766
Suillentia	fem. n.	A word arbitrarily created as the name of a bacterial genus	0.596202
Rutabadema	fem. n.	A word arbitrarily created as the name of a bacterial genus	0.511299
Zelusadema	fem. n.	A word arbitrarily created as the name of a bacterial genus	0.926157
Fylacectio	fem. n.	A word arbitrarily created as the name of a bacterial genus	0.779761
Labecaria	fem. n.	A word arbitrarily created as the name of a bacterial genus	0.469798
Arrugia	fem. n.	A word arbitrarily created as the name of a bacterial genus	0.644442
Phrasorea	fem. n.	A word arbitrarily created as the name of a bacterial genus	0.362676
Bajularisa	fem. n.	A word arbitrarily created as the name of a bacterial genus	0.219527
Papulagena	fem. n.	A word arbitrarily created as the name of a bacterial genus	0.173033
Equulascua	fem. n.	A word arbitrarily created as the name of a bacterial genus	0.157035
Veteritudo	fem. n.	A word arbitrarily created as the name of a bacterial genus	0.268674
Flandaria	fem. n.	A word arbitrarily created as the name of a bacterial genus	0.164163
Oppanascua	fem. n.	A word arbitrarily created as the name of a bacterial genus	0.412709
Thymbaria	fem. n.	A word arbitrarily created as the name of a bacterial genus	0.883384
Vasarella	fem. n.	A word arbitrarily created as the name of a bacterial genus	0.701149
Panthetica	fem. n.	A word arbitrarily created as the name of a bacterial genus	0.378951
Turibetica	fem. n.	A word arbitrarily created as the name of a bacterial genus	0.226798
Pecorectio	fem. n.	A word arbitrarily created as the name of a bacterial genus	0.114906
Deturia	fem. n.	A word arbitrarily created as the name of a bacterial genus	0.225806
Viroraphia	fem. n.	A word arbitrarily created as the name of a bacterial genus	0.623916
Cultriquia	fem. n.	A word arbitrarily created as the name of a bacterial genus	0.653855
Timoritudo	fem. n.	A word arbitrarily created as the name of a bacterial genus	0.0711479
Bubalarisa	fem. n.	A word arbitrarily created as the name of a bacterial genus	0.165452
Putamactea	fem. n.	A word arbitrarily created as the name of a bacterial genus	0.180734
Armelagena	fem. n.	A word arbitrarily created as the name of a bacterial genus	0.0232318
Nidulitudo	fem. n.	A word arbitrarily created as the name of a bacterial genus	0.211984
Displiquia	fem. n.	A word arbitrarily created as the name of a bacterial genus	0.941186
Aptusitas	fem. n.	A word arbitrarily created as the name of a bacterial genus	0.927192
Cubicentia	fem. n.	A word arbitrarily created as the name of a bacterial genus	0.961249
Soissitudo	fem. n.	A word arbitrarily created as the name of a bacterial genus	0.0842532
Milifectio	fem. n.	A word arbitrarily created as the name of a bacterial genus	0.43478
Biarcaria	fem. n.	A word arbitrarily created as the name of a bacterial genus	0.219357
Chaeriquia	fem. n.	A word arbitrarily created as the name of a bacterial genus	0.988025
Succlutela	fem. n.	A word arbitrarily created as the name of a bacterial genus	0.173603
Econtatrix	fem. n.	A word arbitrarily created as the name of a bacterial genus	0.314676
Flustorea	fem. n.	A word arbitrarily created as the name of a bacterial genus	0.835169
Sturgetica	fem. n.	A word arbitrarily created as the name of a bacterial genus	0.497965
Aerucitas	fem. n.	A word arbitrarily created as the name of a bacterial genus	0.929724
Hymenitas	fem. n.	A word arbitrarily created as the name of a bacterial genus	0.68271
Abagmitas	fem. n.	A word arbitrarily created as the name of a bacterial genus	0.643633
Castrilago	fem. n.	A word arbitrarily created as the name of a bacterial genus	0.758581
Alearia	fem. n.	A word arbitrarily created as the name of a bacterial genus	0.229849
Balinarisa	fem. n.	A word arbitrarily created as the name of a bacterial genus	0.618966
Captragena	fem. n.	A word arbitrarily created as the name of a bacterial genus	0.833257
Chernaphia	fem. n.	A word arbitrarily created as the name of a bacterial genus	0.584416
Oracleptis	fem. n.	A word arbitrarily created as the name of a bacterial genus	0.0114338
Popanentia	fem. n.	A word arbitrarily created as the name of a bacterial genus	0.892164
Cymosascua	fem. n.	A word arbitrarily created as the name of a bacterial genus	0.594307
Neciautela	fem. n.	A word arbitrarily created as the name of a bacterial genus	0.517844
Embamaria	fem. n.	A word arbitrarily created as the name of a bacterial genus	0.0661304
Livenaphia	fem. n.	A word arbitrarily created as the name of a bacterial genus	0.61201
Choasitudo	fem. n.	A word arbitrarily created as the name of a bacterial genus	0.437384
Destrilago	fem. n.	A word arbitrarily created as the name of a bacterial genus	0.503191
Bocasitudo	fem. n.	A word arbitrarily created as the name of a bacterial genus	0.855778
Tetanilago	fem. n.	A word arbitrarily created as the name of a bacterial genus	0.183177
Sinopitudo	fem. n.	A word arbitrarily created as the name of a bacterial genus	0.152676
Bostraria	fem. n.	A word arbitrarily created as the name of a bacterial genus	0.903161
Gerulella	fem. n.	A word arbitrarily created as the name of a bacterial genus	0.258386
Camacutela	fem. n.	A word arbitrarily created as the name of a bacterial genus	0.200791
Helicellio	fem. n.	A word arbitrarily created as the name of a bacterial genus	0.247691
Rudecagena	fem. n.	A word arbitrarily created as the name of a bacterial genus	0.186794
Famosilago	fem. n.	A word arbitrarily created as the name of a bacterial genus	0.362579
Chausorea	fem. n.	A word arbitrarily created as the name of a bacterial genus	0.276314
Noniaitas	fem. n.	A word arbitrarily created as the name of a bacterial genus	0.97452
Eclogitudo	fem. n.	A word arbitrarily created as the name of a bacterial genus	0.180722
Pejureptis	fem. n.	A word arbitrarily created as the name of a bacterial genus	0.084936
Funicaphia	fem. n.	A word arbitrarily created as the name of a bacterial genus	0.698044
Arferactea	fem. n.	A word arbitrarily created as the name of a bacterial genus	0.300047
Coercentia	fem. n.	A word arbitrarily created as the name of a bacterial genus	0.768596
Birematrix	fem. n.	A word arbitrarily created as the name of a bacterial genus	0.780126
Fidejorea	fem. n.	A word arbitrarily created as the name of a bacterial genus	0.29793
Panthiquia	fem. n.	A word arbitrarily created as the name of a bacterial genus	0.0396988
Satiaeptis	fem. n.	A word arbitrarily created as the name of a bacterial genus	0.927086
Novicella	fem. n.	A word arbitrarily created as the name of a bacterial genus	0.915777
Sonusectio	fem. n.	A word arbitrarily created as the name of a bacterial genus	0.890275
Ambubatrix	fem. n.	A word arbitrarily created as the name of a bacterial genus	0.685961
Arpasagena	fem. n.	A word arbitrarily created as the name of a bacterial genus	0.458659
Casuletica	fem. n.	A word arbitrarily created as the name of a bacterial genus	0.302953
Melanagena	fem. n.	A word arbitrarily created as the name of a bacterial genus	0.654811
Exsufactea	fem. n.	A word arbitrarily created as the name of a bacterial genus	0.0256662
Agathentia	fem. n.	A word arbitrarily created as the name of a bacterial genus	0.497139
Gulosectio	fem. n.	A word arbitrarily created as the name of a bacterial genus	0.867753
Amictactea	fem. n.	A word arbitrarily created as the name of a bacterial genus	0.391508
Cupidella	fem. n.	A word arbitrarily created as the name of a bacterial genus	0.663491
Diaphellio	fem. n.	A word arbitrarily created as the name of a bacterial genus	0.178047
Romanicula	fem. n.	A word arbitrarily created as the name of a bacterial genus	0.034501
Sorexiquia	fem. n.	A word arbitrarily created as the name of a bacterial genus	0.469815
Decocadema	fem. n.	A word arbitrarily created as the name of a bacterial genus	0.178623
Econtiquia	fem. n.	A word arbitrarily created as the name of a bacterial genus	0.721531
Ascitaphia	fem. n.	A word arbitrarily created as the name of a bacterial genus	0.103338
Prioractea	fem. n.	A word arbitrarily created as the name of a bacterial genus	0.721328
Repenellio	fem. n.	A word arbitrarily created as the name of a bacterial genus	0.574438
Homogaphia	fem. n.	A word arbitrarily created as the name of a bacterial genus	0.236163
Tacitorea	fem. n.	A word arbitrarily created as the name of a bacterial genus	0.4705
Vasaella	fem. n.	A word arbitrarily created as the name of a bacterial genus	0.444938
Pilamitudo	fem. n.	A word arbitrarily created as the name of a bacterial genus	0.93222
Aquolatrix	fem. n.	A word arbitrarily created as the name of a bacterial genus	0.654699
Camiletica	fem. n.	A word arbitrarily created as the name of a bacterial genus	0.354558
Labaratrix	fem. n.	A word arbitrarily created as the name of a bacterial genus	0.172345
Feralitudo	fem. n.	A word arbitrarily created as the name of a bacterial genus	0.170772
Pyrenella	fem. n.	A word arbitrarily created as the name of a bacterial genus	0.0252987
Aptotagena	fem. n.	A word arbitrarily created as the name of a bacterial genus	0.666966
Vacerascua	fem. n.	A word arbitrarily created as the name of a bacterial genus	0.0432028
Memoreptis	fem. n.	A word arbitrarily created as the name of a bacterial genus	0.094162
Delocarisa	fem. n.	A word arbitrarily created as the name of a bacterial genus	0.71522
Rastrascua	fem. n.	A word arbitrarily created as the name of a bacterial genus	0.207239
Elephagena	fem. n.	A word arbitrarily created as the name of a bacterial genus	0.424462
Quiddadema	fem. n.	A word arbitrarily created as the name of a bacterial genus	0.982545
Patelicula	fem. n.	A word arbitrarily created as the name of a bacterial genus	0.869364
Talusectio	fem. n.	A word arbitrarily created as the name of a bacterial genus	0.207781
Regenia	fem. n.	A word arbitrarily created as the name of a bacterial genus	0.132212
Totidicula	fem. n.	A word arbitrarily created as the name of a bacterial genus	0.228674
Nylonascua	fem. n.	A word arbitrarily created as the name of a bacterial genus	0.189998
Feficascua	fem. n.	A word arbitrarily created as the name of a bacterial genus	0.407692
Obtuseptis	fem. n.	A word arbitrarily created as the name of a bacterial genus	0.235543
Divicagena	fem. n.	A word arbitrarily created as the name of a bacterial genus	0.3746
Tonitorea	fem. n.	A word arbitrarily created as the name of a bacterial genus	0.678809
Armonentia	fem. n.	A word arbitrarily created as the name of a bacterial genus	0.864816
Ejusmectio	fem. n.	A word arbitrarily created as the name of a bacterial genus	0.898833
Vaginorea	fem. n.	A word arbitrarily created as the name of a bacterial genus	0.540513
Colubaria	fem. n.	A word arbitrarily created as the name of a bacterial genus	0.429049
Dioecorea	fem. n.	A word arbitrarily created as the name of a bacterial genus	0.499375
Carabactea	fem. n.	A word arbitrarily created as the name of a bacterial genus	0.921492
Hyberagena	fem. n.	A word arbitrarily created as the name of a bacterial genus	0.0080144
Linaicula	fem. n.	A word arbitrarily created as the name of a bacterial genus	0.619089
Paicagena	fem. n.	A word arbitrarily created as the name of a bacterial genus	0.09576
Arithitas	fem. n.	A word arbitrarily created as the name of a bacterial genus	0.968637
Rapulagena	fem. n.	A word arbitrarily created as the name of a bacterial genus	0.104057
Colubentia	fem. n.	A word arbitrarily created as the name of a bacterial genus	0.405783
Alioqorea	fem. n.	A word arbitrarily created as the name of a bacterial genus	0.792041
Luridatrix	fem. n.	A word arbitrarily created as the name of a bacterial genus	0.941555
Decidactea	fem. n.	A word arbitrarily created as the name of a bacterial genus	0.110431
Sexenadema	fem. n.	A word arbitrarily created as the name of a bacterial genus	0.0420279
Retunitas	fem. n.	A word arbitrarily created as the name of a bacterial genus	0.6268
Loceleptis	fem. n.	A word arbitrarily created as the name of a bacterial genus	0.569233
Lixivagena	fem. n.	A word arbitrarily created as the name of a bacterial genus	0.932207
Argaicula	fem. n.	A word arbitrarily created as the name of a bacterial genus	0.6322
Ullusicula	fem. n.	A word arbitrarily created as the name of a bacterial genus	0.874002
Distrorea	fem. n.	A word arbitrarily created as the name of a bacterial genus	0.555892
Phlogitas	fem. n.	A word arbitrarily created as the name of a bacterial genus	0.561583
Settheptis	fem. n.	A word arbitrarily created as the name of a bacterial genus	0.311151
Pulchellio	fem. n.	A word arbitrarily created as the name of a bacterial genus	0.886918
Neophella	fem. n.	A word arbitrarily created as the name of a bacterial genus	0.563518
Nylonellio	fem. n.	A word arbitrarily created as the name of a bacterial genus	0.942991
Coponilago	fem. n.	A word arbitrarily created as the name of a bacterial genus	0.794073
Aevaella	fem. n.	A word arbitrarily created as the name of a bacterial genus	0.702792
Ranunia	fem. n.	A word arbitrarily created as the name of a bacterial genus	0.78677
Socoleptis	fem. n.	A word arbitrarily created as the name of a bacterial genus	0.281617
Sifunactea	fem. n.	A word arbitrarily created as the name of a bacterial genus	0.142585
Maeanaria	fem. n.	A word arbitrarily created as the name of a bacterial genus	0.365569
Patibicula	fem. n.	A word arbitrarily created as the name of a bacterial genus	0.552992
Selibia	fem. n.	A word arbitrarily created as the name of a bacterial genus	0.713674
Sarisicula	fem. n.	A word arbitrarily created as the name of a bacterial genus	0.0407736
Frondactea	fem. n.	A word arbitrarily created as the name of a bacterial genus	0.478645
Stigmella	fem. n.	A word arbitrarily created as the name of a bacterial genus	0.809531
Angaratrix	fem. n.	A word arbitrarily created as the name of a bacterial genus	0.582784
Cantharisa	fem. n.	A word arbitrarily created as the name of a bacterial genus	0.285061
Arielia	fem. n.	A word arbitrarily created as the name of a bacterial genus	0.671745
Surenella	fem. n.	A word arbitrarily created as the name of a bacterial genus	0.359505
Ablegectio	fem. n.	A word arbitrarily created as the name of a bacterial genus	0.641496
Moechilago	fem. n.	A word arbitrarily created as the name of a bacterial genus	0.506808
Rarusectio	fem. n.	A word arbitrarily created as the name of a bacterial genus	0.645849
Acratadema	fem. n.	A word arbitrarily created as the name of a bacterial genus	0.0770611
Cirrharisa	fem. n.	A word arbitrarily created as the name of a bacterial genus	0.186492
Mandratrix	fem. n.	A word arbitrarily created as the name of a bacterial genus	0.259936
Macaradema	fem. n.	A word arbitrarily created as the name of a bacterial genus	0.554018
Apathicula	fem. n.	A word arbitrarily created as the name of a bacterial genus	0.217378
Metabeptis	fem. n.	A word arbitrarily created as the name of a bacterial genus	0.868558
Naenicula	fem. n.	A word arbitrarily created as the name of a bacterial genus	0.398729
Occecitas	fem. n.	A word arbitrarily created as the name of a bacterial genus	0.381217
Sugililago	fem. n.	A word arbitrarily created as the name of a bacterial genus	0.920401
Repubutela	fem. n.	A word arbitrarily created as the name of a bacterial genus	0.477863
Hasdrutela	fem. n.	A word arbitrarily created as the name of a bacterial genus	0.0162525
Actoricula	fem. n.	A word arbitrarily created as the name of a bacterial genus	0.653315
Caculactea	fem. n.	A word arbitrarily created as the name of a bacterial genus	0.790162
Vemenia	fem. n.	A word arbitrarily created as the name of a bacterial genus	0.424242
Morulorea	fem. n.	A word arbitrarily created as the name of a bacterial genus	0.708424
Aciscatrix	fem. n.	A word arbitrarily created as the name of a bacterial genus	0.847368
Ricineptis	fem. n.	A word arbitrarily created as the name of a bacterial genus	0.372912
Daosilago	fem. n.	A word arbitrarily created as the name of a bacterial genus	0.346646
Camileptis	fem. n.	A word arbitrarily created as the name of a bacterial genus	0.62723
Cluenentia	fem. n.	A word arbitrarily created as the name of a bacterial genus	0.894137
Elingitas	fem. n.	A word arbitrarily created as the name of a bacterial genus	0.00272748
Duramaria	fem. n.	A word arbitrarily created as the name of a bacterial genus	0.0296366
Diratetica	fem. n.	A word arbitrarily created as the name of a bacterial genus	0.625959
Abmatitudo	fem. n.	A word arbitrarily created as the name of a bacterial genus	0.035789
Exempactea	fem. n.	A word arbitrarily created as the name of a bacterial genus	0.342459
Cynegellio	fem. n.	A word arbitrarily created as the name of a bacterial genus	0.724759
Astytia	fem. n.	A word arbitrarily created as the name of a bacterial genus	0.274637
Inaeqatrix	fem. n.	A word arbitrarily created as the name of a bacterial genus	0.472604
Encycectio	fem. n.	A word arbitrarily created as the name of a bacterial genus	0.676657
Moestatrix	fem. n.	A word arbitrarily created as the name of a bacterial genus	0.396618
Alpinella	fem. n.	A word arbitrarily created as the name of a bacterial genus	0.946743
Arvailago	fem. n.	A word arbitrarily created as the name of a bacterial genus	0.55711
Utcaectio	fem. n.	A word arbitrarily created as the name of a bacterial genus	0.366326
Arcebeptis	fem. n.	A word arbitrarily created as the name of a bacterial genus	0.38206
Arrogiquia	fem. n.	A word arbitrarily created as the name of a bacterial genus	0.643035
Infabactea	fem. n.	A word arbitrarily created as the name of a bacterial genus	0.506418
Livenagena	fem. n.	A word arbitrarily created as the name of a bacterial genus	0.0520602
Epithectio	fem. n.	A word arbitrarily created as the name of a bacterial genus	0.476444
Farinellio	fem. n.	A word arbitrarily created as the name of a bacterial genus	0.252733
Fulicadema	fem. n.	A word arbitrarily created as the name of a bacterial genus	0.829299
Indicectio	fem. n.	A word arbitrarily created as the name of a bacterial genus	0.666127
Demptella	fem. n.	A word arbitrarily created as the name of a bacterial genus	0.531741
Gazelectio	fem. n.	A word arbitrarily created as the name of a bacterial genus	0.436236
Quoadilago	fem. n.	A word arbitrarily created as the name of a bacterial genus	0.852043
Neciaella	fem. n.	A word arbitrarily created as the name of a bacterial genus	0.703776
Agryputela	fem. n.	A word arbitrarily created as the name of a bacterial genus	0.442597
Cuparaphia	fem. n.	A word arbitrarily created as the name of a bacterial genus	0.0790009
Bugonitas	fem. n.	A word arbitrarily created as the name of a bacterial genus	0.850383
Plebsetica	fem. n.	A word arbitrarily created as the name of a bacterial genus	0.651013
Volitilago	fem. n.	A word arbitrarily created as the name of a bacterial genus	0.0390585
Choasilago	fem. n.	A word arbitrarily created as the name of a bacterial genus	0.390058
Arrugadema	fem. n.	A word arbitrarily created as the name of a bacterial genus	0.472426
Doloragena	fem. n.	A word arbitrarily created as the name of a bacterial genus	0.386347
Pejereptis	fem. n.	A word arbitrarily created as the name of a bacterial genus	0.931574
Plennentia	fem. n.	A word arbitrarily created as the name of a bacterial genus	0.104956
Viticella	fem. n.	A word arbitrarily created as the name of a bacterial genus	0.481057
Accubiquia	fem. n.	A word arbitrarily created as the name of a bacterial genus	0.147133
Felicaria	fem. n.	A word arbitrarily created as the name of a bacterial genus	0.633593
Effugetica	fem. n.	A word arbitrarily created as the name of a bacterial genus	0.181953
Seducutela	fem. n.	A word arbitrarily created as the name of a bacterial genus	0.811666
Gelicellio	fem. n.	A word arbitrarily created as the name of a bacterial genus	0.986974
Vetulatrix	fem. n.	A word arbitrarily created as the name of a bacterial genus	0.0203919
Dilecorea	fem. n.	A word arbitrarily created as the name of a bacterial genus	0.472882
Xylonarisa	fem. n.	A word arbitrarily created as the name of a bacterial genus	0.367062
Cinypellio	fem. n.	A word arbitrarily created as the name of a bacterial genus	0.253846
Acanteptis	fem. n.	A word arbitrarily created as the name of a bacterial genus	0.630863
Donarascua	fem. n.	A word arbitrarily created as the name of a bacterial genus	0.0976604
Apophactea	fem. n.	A word arbitrarily created as the name of a bacterial genus	0.363031
Amnacilago	fem. n.	A word arbitrarily created as the name of a bacterial genus	0.859526
Rastrorea	fem. n.	A word arbitrarily created as the name of a bacterial genus	0.958668
Nucatiquia	fem. n.	A word arbitrarily created as the name of a bacterial genus	0.616296
Ladania	fem. n.	A word arbitrarily created as the name of a bacterial genus	0.244674
Bugonatrix	fem. n.	A word arbitrarily created as the name of a bacterial genus	0.1877
Anachutela	fem. n.	A word arbitrarily created as the name of a bacterial genus	0.668009
Mimogorea	fem. n.	A word arbitrarily created as the name of a bacterial genus	0.715465
Actinarisa	fem. n.	A word arbitrarily created as the name of a bacterial genus	0.939096
Stigmectio	fem. n.	A word arbitrarily created as the name of a bacterial genus	0.226565
Tacitatrix	fem. n.	A word arbitrarily created as the name of a bacterial genus	0.590612
Civicaria	fem. n.	A word arbitrarily created as the name of a bacterial genus	0.717506
Regalectio	fem. n.	A word arbitrarily created as the name of a bacterial genus	0.207094
Bethliquia	fem. n.	A word arbitrarily created as the name of a bacterial genus	0.772561
Mesesorea	fem. n.	A word arbitrarily created as the name of a bacterial genus	0.523788
Conecellio	fem. n.	A word arbitrarily created as the name of a bacterial genus	0.899879
Aliptadema	fem. n.	A word arbitrarily created as the name of a bacterial genus	0.736775
Aptotascua	fem. n.	A word arbitrarily created as the name of a bacterial genus	0.673244
Illacaphia	fem. n.	A word arbitrarily created as the name of a bacterial genus	0.262265
Memoraphia	fem. n.	A word arbitrarily created as the name of a bacterial genus	0.536934
Rudusagena	fem. n.	A word arbitrarily created as the name of a bacterial genus	0.530491
Inscrentia	fem. n.	A word arbitrarily created as the name of a bacterial genus	0.8843
Erythectio	fem. n.	A word arbitrarily created as the name of a bacterial genus	0.592379
Calabellio	fem. n.	A word arbitrarily created as the name of a bacterial genus	0.358835
Fenautela	fem. n.	A word arbitrarily created as the name of a bacterial genus	0.139252
Paexaphia	fem. n.	A word arbitrarily created as the name of a bacterial genus	0.366177
Residia	fem. n.	A word arbitrarily created as the name of a bacterial genus	0.482152
Arferascua	fem. n.	A word arbitrarily created as the name of a bacterial genus	0.439872
Nanusicula	fem. n.	A word arbitrarily created as the name of a bacterial genus	0.491741
Vaginitudo	fem. n.	A word arbitrarily created as the name of a bacterial genus	0.399024
Cucuborea	fem. n.	A word arbitrarily created as the name of a bacterial genus	0.949691
Spretellio	fem. n.	A word arbitrarily created as the name of a bacterial genus	0.71342
Tuguretica	fem. n.	A word arbitrarily created as the name of a bacterial genus	0.0515817
Caatutela	fem. n.	A word arbitrarily created as the name of a bacterial genus	0.677197
Orcivetica	fem. n.	A word arbitrarily created as the name of a bacterial genus	0.855058
Bivireptis	fem. n.	A word arbitrarily created as the name of a bacterial genus	0.148953
Tenebilago	fem. n.	A word arbitrarily created as the name of a bacterial genus	0.328045
Mobilutela	fem. n.	A word arbitrarily created as the name of a bacterial genus	0.575166
Libeletica	fem. n.	A word arbitrarily created as the name of a bacterial genus	0.994493
Aenulella	fem. n.	A word arbitrarily created as the name of a bacterial genus	0.781716
Insecitas	fem. n.	A word arbitrarily created as the name of a bacterial genus	0.45258
Estimadema	fem. n.	A word arbitrarily created as the name of a bacterial genus	0.996172
Thiasetica	fem. n.	A word arbitrarily created as the name of a bacterial genus	0.223751
Sagacellio	fem. n.	A word arbitrarily created as the name of a bacterial genus	0.245116
Epogdactea	fem. n.	A word arbitrarily created as the name of a bacterial genus	0.459563
Almitilago	fem. n.	A word arbitrarily created as the name of a bacterial genus	0.664271
Resaaphia	fem. n.	A word arbitrarily created as the name of a bacterial genus	0.107883
Telaagena	fem. n.	A word arbitrarily created as the name of a bacterial genus	0.192239
Coaptella	fem. n.	A word arbitrarily created as the name of a bacterial genus	0.92321
Aaatarisa	fem. n.	A word arbitrarily created as the name of a bacterial genus	0.22501
Subtritas	fem. n.	A word arbitrarily created as the name of a bacterial genus	0.782443
Faticetica	fem. n.	A word arbitrarily created as the name of a bacterial genus	0.613039
Pyxisatrix	fem. n.	A word arbitrarily created as the name of a bacterial genus	0.930815
Cnesteptis	fem. n.	A word arbitrarily created as the name of a bacterial genus	0.707811
Amellascua	fem. n.	A word arbitrarily created as the name of a bacterial genus	0.180795
Oecoliquia	fem. n.	A word arbitrarily created as the name of a bacterial genus	0.178788
Spermentia	fem. n.	A word arbitrarily created as the name of a bacterial genus	0.149027
Eaineptis	fem. n.	A word arbitrarily created as the name of a bacterial genus	0.7271
Cilotia	fem. n.	A word arbitrarily created as the name of a bacterial genus	0.527502
Madidia	fem. n.	A word arbitrarily created as the name of a bacterial genus	0.2895
Cavamentia	fem. n.	A word arbitrarily created as the name of a bacterial genus	0.0606477
Opticellio	fem. n.	A word arbitrarily created as the name of a bacterial genus	0.826881
Negotatrix	fem. n.	A word arbitrarily created as the name of a bacterial genus	0.847604
Diarrilago	fem. n.	A word arbitrarily created as the name of a bacterial genus	0.629113
Cenulia	fem. n.	A word arbitrarily created as the name of a bacterial genus	0.641945
Rhythactea	fem. n.	A word arbitrarily created as the name of a bacterial genus	0.320375
Pusulectio	fem. n.	A word arbitrarily created as the name of a bacterial genus	0.613611
Holocutela	fem. n.	A word arbitrarily created as the name of a bacterial genus	0.922577
Vagineptis	fem. n.	A word arbitrarily created as the name of a bacterial genus	0.557662
Ungularisa	fem. n.	A word arbitrarily created as the name of a bacterial genus	0.272454
Apollella	fem. n.	A word arbitrarily created as the name of a bacterial genus	0.648881
Spisseptis	fem. n.	A word arbitrarily created as the name of a bacterial genus	0.554349
Novomellio	fem. n.	A word arbitrarily created as the name of a bacterial genus	0.422723
Baliniquia	fem. n.	A word arbitrarily created as the name of a bacterial genus	0.209383
Mytulactea	fem. n.	A word arbitrarily created as the name of a bacterial genus	0.515559
Timefatrix	fem. n.	A word arbitrarily created as the name of a bacterial genus	0.214772
Loretutela	fem. n.	A word arbitrarily created as the name of a bacterial genus	0.358495
Feniceptis	fem. n.	A word arbitrarily created as the name of a bacterial genus	0.897205
Albicilago	fem. n.	A word arbitrarily created as the name of a bacterial genus	0.452576
Faginilago	fem. n.	A word arbitrarily created as the name of a bacterial genus	0.0975062
Redomeptis	fem. n.	A word arbitrarily created as the name of a bacterial genus	0.475079
Diribellio	fem. n.	A word arbitrarily created as the name of a bacterial genus	0.785526
Distreptis	fem. n.	A word arbitrarily created as the name of a bacterial genus	0.149526
Quiesaphia	fem. n.	A word arbitrarily created as the name of a bacterial genus	0.579322
Mavorutela	fem. n.	A word arbitrarily created as the name of a bacterial genus	0.000298708
Toparetica	fem. n.	A word arbitrarily created as the name of a bacterial genus	0.747711
Autaascua	fem. n.	A word arbitrarily created as the name of a bacterial genus	0.721851
Leuncorea	fem. n.	A word arbitrarily created as the name of a bacterial genus	0.81839
Vinclectio	fem. n.	A word arbitrarily created as the name of a bacterial genus	0.436996
Apstreptis	fem. n.	A word arbitrarily created as the name of a bacterial genus	0.0872611
Capucicula	fem. n.	A word arbitrarily created as the name of a bacterial genus	0.808237
Nomasagena	fem. n.	A word arbitrarily created as the name of a bacterial genus	0.700878
Exaltactea	fem. n.	A word arbitrarily created as the name of a bacterial genus	0.47355
Samarellio	fem. n.	A word arbitrarily created as the name of a bacterial genus	0.243964
Mugilagena	fem. n.	A word arbitrarily created as the name of a bacterial genus	0.705592
Vacatitudo	fem. n.	A word arbitrarily created as the name of a bacterial genus	0.153474
Pygareptis	fem. n.	A word arbitrarily created as the name of a bacterial genus	0.42529
Hacelarisa	fem. n.	A word arbitrarily created as the name of a bacterial genus	0.799636
Allibascua	fem. n.	A word arbitrarily created as the name of a bacterial genus	0.445199
Extemactea	fem. n.	A word arbitrarily created as the name of a bacterial genus	0.0474854
Halatatrix	fem. n.	A word arbitrarily created as the name of a bacterial genus	0.597715
Maledia	fem. n.	A word arbitrarily created as the name of a bacterial genus	0.607897
Pinetadema	fem. n.	A word arbitrarily created as the name of a bacterial genus	0.965879
Suberactea	fem. n.	A word arbitrarily created as the name of a bacterial genus	0.35478
Iliacella	fem. n.	A word arbitrarily created as the name of a bacterial genus	0.705034
Ligyrarisa	fem. n.	A word arbitrarily created as the name of a bacterial genus	0.114808
Salubeptis	fem. n.	A word arbitrarily created as the name of a bacterial genus	0.920114
Acuaraphia	fem. n.	A word arbitrarily created as the name of a bacterial genus	0.2997
Arealarisa	fem. n.	A word arbitrarily created as the name of a bacterial genus	0.0667986
Purulellio	fem. n.	A word arbitrarily created as the name of a bacterial genus	0.301884
Istocicula	fem. n.	A word arbitrarily created as the name of a bacterial genus	0.0956071
Fericicula	fem. n.	A word arbitrarily created as the name of a bacterial genus	0.389994
Lustractea	fem. n.	A word arbitrarily created as the name of a bacterial genus	0.331736
Cadaveptis	fem. n.	A word arbitrarily created as the name of a bacterial genus	0.299009
Retariquia	fem. n.	A word arbitrarily created as the name of a bacterial genus	0.872366
Orcusellio	fem. n.	A word arbitrarily created as the name of a bacterial genus	0.236982
Chremagena	fem. n.	A word arbitrarily created as the name of a bacterial genus	0.869806
Rasiletica	fem. n.	A word arbitrarily created as the name of a bacterial genus	0.873928
Giganitas	fem. n.	A word arbitrarily created as the name of a bacterial genus	0.11878
Ollusia	fem. n.	A word arbitrarily created as the name of a bacterial genus	0.0140761
Saepsiquia	fem. n.	A word arbitrarily created as the name of a bacterial genus	0.983155
Puerpectio	fem. n.	A word arbitrarily created as the name of a bacterial genus	0.43875
Barycutela	fem. n.	A word arbitrarily created as the name of a bacterial genus	0.972971
Pudoria	fem. n.	A word arbitrarily created as the name of a bacterial genus	0.948169
Cupidarisa	fem. n.	A word arbitrarily created as the name of a bacterial genus	0.617861
Atracatrix	fem. n.	A word arbitrarily created as the name of a bacterial genus	0.0849981
Suboborea	fem. n.	A word arbitrarily created as the name of a bacterial genus	0.152661
Ossucectio	fem. n.	A word arbitrarily created as the name of a bacterial genus	0.418515
Filtrilago	fem. n.	A word arbitrarily created as the name of a bacterial genus	0.925556
Caullaria	fem. n.	A word arbitrarily created as the name of a bacterial genus	0.816102
Chalbatrix	fem. n.	A word arbitrarily created as the name of a bacterial genus	0.862224
Faidadema	fem. n.	A word arbitrarily created as the name of a bacterial genus	0.561365
Medulascua	fem. n.	A word arbitrarily created as the name of a bacterial genus	0.220243
Baamadema	fem. n.	A word arbitrarily created as the name of a bacterial genus	0.793205
Isosceptis	fem. n.	A word arbitrarily created as the name of a bacterial genus	0.763869
Addenia	fem. n.	A word arbitrarily created as the name of a bacterial genus	0.480776
Alvusilago	fem. n.	A word arbitrarily created as the name of a bacterial genus	0.995757
Sciphilago	fem. n.	A word arbitrarily created as the name of a bacterial genus	0.902712
Zagonilago	fem. n.	A word arbitrarily created as the name of a bacterial genus	0.820575
Roberagena	fem. n.	A word arbitrarily created as the name of a bacterial genus	0.990937
Cicilia	fem. n.	A word arbitrarily created as the name of a bacterial genus	0.450427
Digamia	fem. n.	A word arbitrarily created as the name of a bacterial genus	0.559045
Brephella	fem. n.	A word arbitrarily created as the name of a bacterial genus	0.636721
Assocactea	fem. n.	A word arbitrarily created as the name of a bacterial genus	0.0384314
Scandarisa	fem. n.	A word arbitrarily created as the name of a bacterial genus	0.394629
Pomerella	fem. n.	A word arbitrarily created as the name of a bacterial genus	0.595069
Undiqitudo	fem. n.	A word arbitrarily created as the name of a bacterial genus	0.0784938
Arnusellio	fem. n.	A word arbitrarily created as the name of a bacterial genus	0.90684
Agnomia	fem. n.	A word arbitrarily created as the name of a bacterial genus	0.272763
Setthaphia	fem. n.	A word arbitrarily created as the name of a bacterial genus	0.743813
Monocitas	fem. n.	A word arbitrarily created as the name of a bacterial genus	0.838388
Impolia	fem. n.	A word arbitrarily created as the name of a bacterial genus	0.402865
Cenulella	fem. n.	A word arbitrarily created as the name of a bacterial genus	0.641635
Nubifitas	fem. n.	A word arbitrarily created as the name of a bacterial genus	0.0532711
Papularia	fem. n.	A word arbitrarily created as the name of a bacterial genus	0.09951
Albedutela	fem. n.	A word arbitrarily created as the name of a bacterial genus	0.541052
Hinciarisa	fem. n.	A word arbitrarily created as the name of a bacterial genus	0.342014
Inanladema	fem. n.	A word arbitrarily created as the name of a bacterial genus	0.272327
Syrinicula	fem. n.	A word arbitrarily created as the name of a bacterial genus	0.600586
Thiasorea	fem. n.	A word arbitrarily created as the name of a bacterial genus	0.753295
Hausellio	fem. n.	A word arbitrarily created as the name of a bacterial genus	0.822156
Glossia	fem. n.	A word arbitrarily created as the name of a bacterial genus	0.424013
Brephellio	fem. n.	A word arbitrarily created as the name of a bacterial genus	0.770735
Bolusitudo	fem. n.	A word arbitrarily created as the name of a bacterial genus	0.64411
Bruchicula	fem. n.	A word arbitrarily created as the name of a bacterial genus	0.257196
Casulentia	fem. n.	A word arbitrarily created as the name of a bacterial genus	0.962314
Gimelitudo	fem. n.	A word arbitrarily created as the name of a bacterial genus	0.818901
Quandatrix	fem. n.	A word arbitrarily created as the name of a bacterial genus	0.939783
Exsometica	fem. n.	A word arbitrarily created as the name of a bacterial genus	0.539297
Votivetica	fem. n.	A word arbitrarily created as the name of a bacterial genus	0.159435
Obnoxatrix	fem. n.	A word arbitrarily created as the name of a bacterial genus	0.642967
Lepusentia	fem. n.	A word arbitrarily created as the name of a bacterial genus	0.621353
Pelicia	fem. n.	A word arbitrarily created as the name of a bacterial genus	0.803967
Quiesatrix	fem. n.	A word arbitrarily created as the name of a bacterial genus	0.779597
Impigarisa	fem. n.	A word arbitrarily created as the name of a bacterial genus	0.0440241
Cuticicula	fem. n.	A word arbitrarily created as the name of a bacterial genus	0.364839
Corocilago	fem. n.	A word arbitrarily created as the name of a bacterial genus	0.905197
Annoniquia	fem. n.	A word arbitrarily created as the name of a bacterial genus	0.655533
Drappascua	fem. n.	A word arbitrarily created as the name of a bacterial genus	0.9941
Crebrascua	fem. n.	A word arbitrarily created as the name of a bacterial genus	0.348334
Rodusia	fem. n.	A word arbitrarily created as the name of a bacterial genus	0.700457
Novomilago	fem. n.	A word arbitrarily created as the name of a bacterial genus	0.266237
Artemaria	fem. n.	A word arbitrarily created as the name of a bacterial genus	0.529471
Futilitudo	fem. n.	A word arbitrarily created as the name of a bacterial genus	0.491596
Roburectio	fem. n.	A word arbitrarily created as the name of a bacterial genus	0.819189
Danicicula	fem. n.	A word arbitrarily created as the name of a bacterial genus	0.230321
Volanella	fem. n.	A word arbitrarily created as the name of a bacterial genus	0.0488767
Chuthagena	fem. n.	A word arbitrarily created as the name of a bacterial genus	0.324398
Navusagena	fem. n.	A word arbitrarily created as the name of a bacterial genus	0.977165
Algoratrix	fem. n.	A word arbitrarily created as the name of a bacterial genus	0.956925
Xeresella	fem. n.	A word arbitrarily created as the name of a bacterial genus	0.436988
Viragilago	fem. n.	A word arbitrarily created as the name of a bacterial genus	0.455798
Felicitas	fem. n.	A word arbitrarily created as the name of a bacterial genus	0.312159
Inefforea	fem. n.	A word arbitrarily created as the name of a bacterial genus	0.874065
Saxoparisa	fem. n.	A word arbitrarily created as the name of a bacterial genus	0.0212301
Bruchitas	fem. n.	A word arbitrarily created as the name of a bacterial genus	0.560146
Invularisa	fem. n.	A word arbitrarily created as the name of a bacterial genus	0.929777
Cabalicula	fem. n.	A word arbitrarily created as the name of a bacterial genus	0.209468
Virecella	fem. n.	A word arbitrarily created as the name of a bacterial genus	0.383431
Didymadema	fem. n.	A word arbitrarily created as the name of a bacterial genus	0.709276
Tenurascua	fem. n.	A word arbitrarily created as the name of a bacterial genus	0.389481
Pneautela	fem. n.	A word arbitrarily created as the name of a bacterial genus	0.573907
Idipsagena	fem. n.	A word arbitrarily created as the name of a bacterial genus	0.346747
Fibicadema	fem. n.	A word arbitrarily created as the name of a bacterial genus	0.0649281
Nocivitas	fem. n.	A word arbitrarily created as the name of a bacterial genus	0.294032
Dipyrutela	fem. n.	A word arbitrarily created as the name of a bacterial genus	0.147794
Motusilago	fem. n.	A word arbitrarily created as the name of a bacterial genus	0.270935
Tostria	fem. n.	A word arbitrarily created as the name of a bacterial genus	0.871591
Tyrosagena	fem. n.	A word arbitrarily created as the name of a bacterial genus	0.870078
Moribia	fem. n.	A word arbitrarily created as the name of a bacterial genus	0.0673671
Revelella	fem. n.	A word arbitrarily created as the name of a bacterial genus	0.250723
Addenetica	fem. n.	A word arbitrarily created as the name of a bacterial genus	0.811106
Aemulilago	fem. n.	A word arbitrarily created as the name of a bacterial genus	0.725178
Tunicia	fem. n.	A word arbitrarily created as the name of a bacterial genus	0.33498
Pejurella	fem. n.	A word arbitrarily created as the name of a bacterial genus	0.154874
Libelitas	fem. n.	A word arbitrarily created as the name of a bacterial genus	0.180341
Scalmilago	fem. n.	A word arbitrarily created as the name of a bacterial genus	0.382934
Pixisellio	fem. n.	A word arbitrarily created as the name of a bacterial genus	0.304373
Inlecagena	fem. n.	A word arbitrarily created as the name of a bacterial genus	0.253522
Bekaharisa	fem. n.	A word arbitrarily created as the name of a bacterial genus	0.714092
Recogitudo	fem. n.	A word arbitrarily created as the name of a bacterial genus	0.531983
Aratraria	fem. n.	A word arbitrarily created as the name of a bacterial genus	0.871071
Aptusactea	fem. n.	A word arbitrarily created as the name of a bacterial genus	0.851957
Stactorea	fem. n.	A word arbitrarily created as the name of a bacterial genus	0.000835718
Lapicarisa	fem. n.	A word arbitrarily created as the name of a bacterial genus	0.943372
Ancileptis	fem. n.	A word arbitrarily created as the name of a bacterial genus	0.405634
Dedolilago	fem. n.	A word arbitrarily created as the name of a bacterial genus	0.371082
Catilia	fem. n.	A word arbitrarily created as the name of a bacterial genus	0.662377
Artufascua	fem. n.	A word arbitrarily created as the name of a bacterial genus	0.938129
Levorentia	fem. n.	A word arbitrarily created as the name of a bacterial genus	0.84729
Inattetica	fem. n.	A word arbitrarily created as the name of a bacterial genus	0.47425
Bucinaria	fem. n.	A word arbitrarily created as the name of a bacterial genus	0.343634
Dodecilago	fem. n.	A word arbitrarily created as the name of a bacterial genus	0.525773
Horizarisa	fem. n.	A word arbitrarily created as the name of a bacterial genus	0.551008
Toparadema	fem. n.	A word arbitrarily created as the name of a bacterial genus	0.179311
Zeraeptis	fem. n.	A word arbitrarily created as the name of a bacterial genus	0.00905606
Ordinicula	fem. n.	A word arbitrarily created as the name of a bacterial genus	0.572496
Ecfatatrix	fem. n.	A word arbitrarily created as the name of a bacterial genus	0.113823
Strenaphia	fem. n.	A word arbitrarily created as the name of a bacterial genus	0.716399
Bicubicula	fem. n.	A word arbitrarily created as the name of a bacterial genus	0.94108
Diusiaphia	fem. n.	A word arbitrarily created as the name of a bacterial genus	0.217287
Ignobascua	fem. n.	A word arbitrarily created as the name of a bacterial genus	0.561367
Toculactea	fem. n.	A word arbitrarily created as the name of a bacterial genus	0.813569
Adhucentia	fem. n.	A word arbitrarily created as the name of a bacterial genus	0.454182
Grossorea	fem. n.	A word arbitrarily created as the name of a bacterial genus	0.543501
Sapidella	fem. n.	A word arbitrarily created as the name of a bacterial genus	0.909052
Peribetica	fem. n.	A word arbitrarily created as the name of a bacterial genus	0.493273
Riciniquia	fem. n.	A word arbitrarily created as the name of a bacterial genus	0.420244
Aucelarisa	fem. n.	A word arbitrarily created as the name of a bacterial genus	0.374758
Fiberitudo	fem. n.	A word arbitrarily created as the name of a bacterial genus	0.87562
Lotusactea	fem. n.	A word arbitrarily created as the name of a bacterial genus	0.862944
Trigliquia	fem. n.	A word arbitrarily created as the name of a bacterial genus	0.374356
Fenesactea	fem. n.	A word arbitrarily created as the name of a bacterial genus	0.138351
Dileceptis	fem. n.	A word arbitrarily created as the name of a bacterial genus	0.731923
Fanalutela	fem. n.	A word arbitrarily created as the name of a bacterial genus	0.206586
Aegypagena	fem. n.	A word arbitrarily created as the name of a bacterial genus	0.749589
Nuditaphia	fem. n.	A word arbitrarily created as the name of a bacterial genus	0.875241
Moralilago	fem. n.	A word arbitrarily created as the name of a bacterial genus	0.0128918
Fluenitudo	fem. n.	A word arbitrarily created as the name of a bacterial genus	0.848265
Macaria	fem. n.	A word arbitrarily created as the name of a bacterial genus	0.40604
Tunicascua	fem. n.	A word arbitrarily created as the name of a bacterial genus	0.457839
Cinaretica	fem. n.	A word arbitrarily created as the name of a bacterial genus	0.566687
Dasypagena	fem. n.	A word arbitrarily created as the name of a bacterial genus	0.105261
Magonella	fem. n.	A word arbitrarily created as the name of a bacterial genus	0.7388
Hyoscarisa	fem. n.	A word arbitrarily created as the name of a bacterial genus	0.187368
Exhedella	fem. n.	A word arbitrarily created as the name of a bacterial genus	0.648588
Cauliquia	fem. n.	A word arbitrarily created as the name of a bacterial genus	0.32724
Revocentia	fem. n.	A word arbitrarily created as the name of a bacterial genus	0.886968
Urticia	fem. n.	A word arbitrarily created as the name of a bacterial genus	0.44897
Squilella	fem. n.	A word arbitrarily created as the name of a bacterial genus	0.928661
Paliletica	fem. n.	A word arbitrarily created as the name of a bacterial genus	0.354435
Arealitudo	fem. n.	A word arbitrarily created as the name of a bacterial genus	0.885909
Floccitudo	fem. n.	A word arbitrarily created as the name of a bacterial genus	0.82466
Guerratrix	fem. n.	A word arbitrarily created as the name of a bacterial genus	0.536649
Lenocatrix	fem. n.	A word arbitrarily created as the name of a bacterial genus	0.069992
Detecetica	fem. n.	A word arbitrarily created as the name of a bacterial genus	0.307294
Acuarilago	fem. n.	A word arbitrarily created as the name of a bacterial genus	0.183953
Falaritas	fem. n.	A word arbitrarily created as the name of a bacterial genus	0.402327
Amiaiquia	fem. n.	A word arbitrarily created as the name of a bacterial genus	0.697247
Laridiquia	fem. n.	A word arbitrarily created as the name of a bacterial genus	0.704805
Heortagena	fem. n.	A word arbitrarily created as the name of a bacterial genus	0.27282
Odiaellio	fem. n.	A word arbitrarily created as the name of a bacterial genus	0.779884
Pupilaphia	fem. n.	A word arbitrarily created as the name of a bacterial genus	0.0482833
Apronectio	fem. n.	A word arbitrarily created as the name of a bacterial genus	0.583839
Trychaphia	fem. n.	A word arbitrarily created as the name of a bacterial genus	0.985536
Squilarisa	fem. n.	A word arbitrarily created as the name of a bacterial genus	0.7625
Sanuseptis	fem. n.	A word arbitrarily created as the name of a bacterial genus	0.252027
Auginellio	fem. n.	A word arbitrarily created as the name of a bacterial genus	0.14795
Telecadema	fem. n.	A word arbitrarily created as the name of a bacterial genus	0.2745
Didacitudo	fem. n.	A word arbitrarily created as the name of a bacterial genus	0.760548
Aurocilago	fem. n.	A word arbitrarily created as the name of a bacterial genus	0.83428
Lucubellio	fem. n.	A word arbitrarily created as the name of a bacterial genus	0.082419
Palilascua	fem. n.	A word arbitrarily created as the name of a bacterial genus	0.309554
Cohibitudo	fem. n.	A word arbitrarily created as the name of a bacterial genus	0.959716
Ficatilago	fem. n.	A word arbitrarily created as the name of a bacterial genus	0.267496
Beberatrix	fem. n.	A word arbitrarily created as the name of a bacterial genus	0.208637
Aerodicula	fem. n.	A word arbitrarily created as the name of a bacterial genus	0.132726
Inexcaphia	fem. n.	A word arbitrarily created as the name of a bacterial genus	0.467368
Melodatrix	fem. n.	A word arbitrarily created as the name of a bacterial genus	0.264615
Coheria	fem. n.	A word arbitrarily created as the name of a bacterial genus	0.695808
Occulascua	fem. n.	A word arbitrarily created as the name of a bacterial genus	0.469337
Inartitudo	fem. n.	A word arbitrarily created as the name of a bacterial genus	0.641057
Menaparisa	fem. n.	A word arbitrarily created as the name of a bacterial genus	0.707511
Exulciquia	fem. n.	A word arbitrarily created as the name of a bacterial genus	0.204557
Sebaitas	fem. n.	A word arbitrarily created as the name of a bacterial genus	0.230236
Intecella	fem. n.	A word arbitrarily created as the name of a bacterial genus	0.781022
Estovarisa	fem. n.	A word arbitrarily created as the name of a bacterial genus	0.399047
Saffrarisa	fem. n.	A word arbitrarily created as the name of a bacterial genus	0.822283
Maledetica	fem. n.	A word arbitrarily created as the name of a bacterial genus	0.222925
Mithreptis	fem. n.	A word arbitrarily created as the name of a bacterial genus	0.558584
Zerotagena	fem. n.	A word arbitrarily created as the name of a bacterial genus	0.852264
Nasalellio	fem. n.	A word arbitrarily created as the name of a bacterial genus	0.392117
Hexagadema	fem. n.	A word arbitrarily created as the name of a bacterial genus	0.381347
Tigilatrix	fem. n.	A word arbitrarily created as the name of a bacterial genus	0.110231
Fabelellio	fem. n.	A word arbitrarily created as the name of a bacterial genus	0.688231
Copadactea	fem. n.	A word arbitrarily created as the name of a bacterial genus	0.97968
Detecitas	fem. n.	A word arbitrarily created as the name of a bacterial genus	0.488056
Decemactea	fem. n.	A word arbitrarily created as the name of a bacterial genus	0.459208
Bidenitas	fem. n.	A word arbitrarily created as the name of a bacterial genus	0.312701
Laganectio	fem. n.	A word arbitrarily created as the name of a bacterial genus	0.622917
Grauladema	fem. n.	A word arbitrarily created as the name of a bacterial genus	0.689955
Saeclilago	fem. n.	A word arbitrarily created as the name of a bacterial genus	0.477798
Erronentia	fem. n.	A word arbitrarily created as the name of a bacterial genus	0.475686
Saxulagena	fem. n.	A word arbitrarily created as the name of a bacterial genus	0.858659
Digamascua	fem. n.	A word arbitrarily created as the name of a bacterial genus	0.438592
Proflorea	fem. n.	A word arbitrarily created as the name of a bacterial genus	0.0195661
Emmanella	fem. n.	A word arbitrarily created as the name of a bacterial genus	0.372802
Balanella	fem. n.	A word arbitrarily created as the name of a bacterial genus	0.318557
Oppugagena	fem. n.	A word arbitrarily created as the name of a bacterial genus	0.989372
Tomixentia	fem. n.	A word arbitrarily created as the name of a bacterial genus	0.588713
Stuppiquia	fem. n.	A word arbitrarily created as the name of a bacterial genus	0.337209
Unetvitas	fem. n.	A word arbitrarily created as the name of a bacterial genus	0.0921343
Pytisectio	fem. n.	A word arbitrarily created as the name of a bacterial genus	0.599498
Amygdicula	fem. n.	A word arbitrarily created as the name of a bacterial genus	0.482994
Chiautela	fem. n.	A word arbitrarily created as the name of a bacterial genus	0.667204
Anethellio	fem. n.	A word arbitrarily created as the name of a bacterial genus	0.690789
Buselella	fem. n.	A word arbitrarily created as the name of a bacterial genus	0.0176039
Inscria	fem. n.	A word arbitrarily created as the name of a bacterial genus	0.638803
Ideolaphia	fem. n.	A word arbitrarily created as the name of a bacterial genus	0.951587
Latusella	fem. n.	A word arbitrarily created as the name of a bacterial genus	0.404861
Perabarisa	fem. n.	A word arbitrarily created as the name of a bacterial genus	0.610208
Vinitatrix	fem. n.	A word arbitrarily created as the name of a bacterial genus	0.865065
Cilibitudo	fem. n.	A word arbitrarily created as the name of a bacterial genus	0.86998
Apronellio	fem. n.	A word arbitrarily created as the name of a bacterial genus	0.00722564
Asthmaphia	fem. n.	A word arbitrarily created as the name of a bacterial genus	0.37843
Adpeletica	fem. n.	A word arbitrarily created as the name of a bacterial genus	0.113354
Depalatrix	fem. n.	A word arbitrarily created as the name of a bacterial genus	0.648603
Ammenarisa	fem. n.	A word arbitrarily created as the name of a bacterial genus	0.923204
Avernitas	fem. n.	A word arbitrarily created as the name of a bacterial genus	0.775067
Invenactea	fem. n.	A word arbitrarily created as the name of a bacterial genus	0.358887
Pistratrix	fem. n.	A word arbitrarily created as the name of a bacterial genus	0.452193
Papilentia	fem. n.	A word arbitrarily created as the name of a bacterial genus	0.645883
Indocellio	fem. n.	A word arbitrarily created as the name of a bacterial genus	0.637162
Bdellitudo	fem. n.	A word arbitrarily created as the name of a bacterial genus	0.190242
Carecia	fem. n.	A word arbitrarily created as the name of a bacterial genus	0.37699
Spissorea	fem. n.	A word arbitrarily created as the name of a bacterial genus	0.917837
Avarcia	fem. n.	A word arbitrarily created as the name of a bacterial genus	0.367035
Damalorea	fem. n.	A word arbitrarily created as the name of a bacterial genus	0.609478
Objecilago	fem. n.	A word arbitrarily created as the name of a bacterial genus	0.638816
Caprectio	fem. n.	A word arbitrarily created as the name of a bacterial genus	0.821472
Mahomilago	fem. n.	A word arbitrarily created as the name of a bacterial genus	0.843187
Eryngatrix	fem. n.	A word arbitrarily created as the name of a bacterial genus	0.69738
Scellitas	fem. n.	A word arbitrarily created as the name of a bacterial genus	0.115591
Stricaphia	fem. n.	A word arbitrarily created as the name of a bacterial genus	0.604855
Epogdascua	fem. n.	A word arbitrarily created as the name of a bacterial genus	0.85975
Vehemectio	fem. n.	A word arbitrarily created as the name of a bacterial genus	0.581327
Ursinascua	fem. n.	A word arbitrarily created as the name of a bacterial genus	0.710825
Miriforea	fem. n.	A word arbitrarily created as the name of a bacterial genus	0.766493
Cuponitas	fem. n.	A word arbitrarily created as the name of a bacterial genus	0.48964
Chutheptis	fem. n.	A word arbitrarily created as the name of a bacterial genus	0.188838
Tostraphia	fem. n.	A word arbitrarily created as the name of a bacterial genus	0.87482
Adporaria	fem. n.	A word arbitrarily created as the name of a bacterial genus	0.318026
Nodusitas	fem. n.	A word arbitrarily created as the name of a bacterial genus	0.120841
Diurnentia	fem. n.	A word arbitrarily created as the name of a bacterial genus	0.173173
Labyrentia	fem. n.	A word arbitrarily created as the name of a bacterial genus	0.928607
Nunciagena	fem. n.	A word arbitrarily created as the name of a bacterial genus	0.122336
Alpinitudo	fem. n.	A word arbitrarily created as the name of a bacterial genus	0.193733
Gressetica	fem. n.	A word arbitrarily created as the name of a bacterial genus	0.260603
Acapnatrix	fem. n.	A word arbitrarily created as the name of a bacterial genus	0.676729
Dijudascua	fem. n.	A word arbitrarily created as the name of a bacterial genus	0.607471
Fluenatrix	fem. n.	A word arbitrarily created as the name of a bacterial genus	0.892151
Typusatrix	fem. n.	A word arbitrarily created as the name of a bacterial genus	0.346374
Laminaria	fem. n.	A word arbitrarily created as the name of a bacterial genus	0.934264
Bilusella	fem. n.	A word arbitrarily created as the name of a bacterial genus	0.218544
Vitelitas	fem. n.	A word arbitrarily created as the name of a bacterial genus	0.654644
Lacinitas	fem. n.	A word arbitrarily created as the name of a bacterial genus	0.4517
Magicutela	fem. n.	A word arbitrarily created as the name of a bacterial genus	0.27124
Celebeptis	fem. n.	A word arbitrarily created as the name of a bacterial genus	0.794486
Tenililago	fem. n.	A word arbitrarily created as the name of a bacterial genus	0.810809
Lyricitudo	fem. n.	A word arbitrarily created as the name of a bacterial genus	0.841266
Angelellio	fem. n.	A word arbitrarily created as the name of a bacterial genus	0.609457
Ramenagena	fem. n.	A word arbitrarily created as the name of a bacterial genus	0.777999
Practetica	fem. n.	A word arbitrarily created as the name of a bacterial genus	0.534029
Undiqiquia	fem. n.	A word arbitrarily created as the name of a bacterial genus	0.985632
Ascopentia	fem. n.	A word arbitrarily created as the name of a bacterial genus	0.0967239
Cisthascua	fem. n.	A word arbitrarily created as the name of a bacterial genus	0.6802
Validilago	fem. n.	A word arbitrarily created as the name of a bacterial genus	0.345904
Cylonicula	fem. n.	A word arbitrarily created as the name of a bacterial genus	0.763319
Majesorea	fem. n.	A word arbitrarily created as the name of a bacterial genus	0.877288
Boiusadema	fem. n.	A word arbitrarily created as the name of a bacterial genus	0.466362
Micanutela	fem. n.	A word arbitrarily created as the name of a bacterial genus	0.355046
Arnusitas	fem. n.	A word arbitrarily created as the name of a bacterial genus	0.307042
Cotanactea	fem. n.	A word arbitrarily created as the name of a bacterial genus	0.21006
Abellactea	fem. n.	A word arbitrarily created as the name of a bacterial genus	0.120901
Cybicilago	fem. n.	A word arbitrarily created as the name of a bacterial genus	0.0978968
Diraitudo	fem. n.	A word arbitrarily created as the name of a bacterial genus	0.442686
Bolarectio	fem. n.	A word arbitrarily created as the name of a bacterial genus	0.368813
Soricarisa	fem. n.	A word arbitrarily created as the name of a bacterial genus	0.35799
Ardifella	fem. n.	A word arbitrarily created as the name of a bacterial genus	0.534758
Haraactea	fem. n.	A word arbitrarily created as the name of a bacterial genus	0.423266
Elangicula	fem. n.	A word arbitrarily created as the name of a bacterial genus	0.832537
Avoncactea	fem. n.	A word arbitrarily created as the name of a bacterial genus	0.172908
Dedecentia	fem. n.	A word arbitrarily created as the name of a bacterial genus	0.46703
Adjudutela	fem. n.	A word arbitrarily created as the name of a bacterial genus	0.591547
Quatricula	fem. n.	A word arbitrarily created as the name of a bacterial genus	0.932119
Horolilago	fem. n.	A word arbitrarily created as the name of a bacterial genus	0.36468
Addeniquia	fem. n.	A word arbitrarily created as the name of a bacterial genus	0.627281
Zelotascua	fem. n.	A word arbitrarily created as the name of a bacterial genus	0.360123
Stillella	fem. n.	A word arbitrarily created as the name of a bacterial genus	0.487003
Loretadema	fem. n.	A word arbitrarily created as the name of a bacterial genus	0.161806
Impacia	fem. n.	A word arbitrarily created as the name of a bacterial genus	0.531875
Furoreptis	fem. n.	A word arbitrarily created as the name of a bacterial genus	0.333111
Hilaria	fem. n.	A word arbitrarily created as the name of a bacterial genus	0.809901
Fiberaria	fem. n.	A word arbitrarily created as the name of a bacterial genus	0.731336
Velesilago	fem. n.	A word arbitrarily created as the name of a bacterial genus	0.00706225
Porosentia	fem. n.	A word arbitrarily created as the name of a bacterial genus	0.772711
Celocentia	fem. n.	A word arbitrarily created as the name of a bacterial genus	0.625671
Eclogiquia	fem. n.	A word arbitrarily created as the name of a bacterial genus	0.268223
Luridetica	fem. n.	A word arbitrarily created as the name of a bacterial genus	0.245388
Mesonaria	fem. n.	A word arbitrarily created as the name of a bacterial genus	0.902178
Naiasitudo	fem. n.	A word arbitrarily created as the name of a bacterial genus	0.981376
Fluidetica	fem. n.	A word arbitrarily created as the name of a bacterial genus	0.344838
Tebetellio	fem. n.	A word arbitrarily created as the name of a bacterial genus	0.136845
Fiberilago	fem. n.	A word arbitrarily created as the name of a bacterial genus	0.694138
Tinusagena	fem. n.	A word arbitrarily created as the name of a bacterial genus	0.0176631
Eburnagena	fem. n.	A word arbitrarily created as the name of a bacterial genus	0.74791
Canabutela	fem. n.	A word arbitrarily created as the name of a bacterial genus	0.294015
Blaspactea	fem. n.	A word arbitrarily created as the name of a bacterial genus	0.760364
Bitaellio	fem. n.	A word arbitrarily created as the name of a bacterial genus	0.290236
Mahelarisa	fem. n.	A word arbitrarily created as the name of a bacterial genus	0.618936
Epiphectio	fem. n.	A word arbitrarily created as the name of a bacterial genus	0.71811
Famulactea	fem. n.	A word arbitrarily created as the name of a bacterial genus	0.122244
Unianactea	fem. n.	A word arbitrarily created as the name of a bacterial genus	0.714541
Cytopadema	fem. n.	A word arbitrarily created as the name of a bacterial genus	0.10706
Occasitas	fem. n.	A word arbitrarily created as the name of a bacterial genus	0.600611
Geminellio	fem. n.	A word arbitrarily created as the name of a bacterial genus	0.410395
Morphutela	fem. n.	A word arbitrarily created as the name of a bacterial genus	0.190248
Biotharisa	fem. n.	A word arbitrarily created as the name of a bacterial genus	0.4258
Cooptentia	fem. n.	A word arbitrarily created as the name of a bacterial genus	0.697641
Cremnia	fem. n.	A word arbitrarily created as the name of a bacterial genus	0.533764
Coassentia	fem. n.	A word arbitrarily created as the name of a bacterial genus	0.590227
Hinciadema	fem. n.	A word arbitrarily created as the name of a bacterial genus	0.441884
Togulia	fem. n.	A word arbitrarily created as the name of a bacterial genus	0.345134
Risibetica	fem. n.	A word arbitrarily created as the name of a bacterial genus	0.689645
Cistharia	fem. n.	A word arbitrarily created as the name of a bacterial genus	0.958778
Rapidicula	fem. n.	A word arbitrarily created as the name of a bacterial genus	0.574771
Mamilella	fem. n.	A word arbitrarily created as the name of a bacterial genus	0.976743
Clysmorea	fem. n.	A word arbitrarily created as the name of a bacterial genus	0.251661
Mirabentia	fem. n.	A word arbitrarily created as the name of a bacterial genus	0.015545
Phrasascua	fem. n.	A word arbitrarily created as the name of a bacterial genus	0.833837
Potulellio	fem. n.	A word arbitrarily created as the name of a bacterial genus	0.773807
Meridadema	fem. n.	A word arbitrarily created as the name of a bacterial genus	0.0612503
Adelpitudo	fem. n.	A word arbitrarily created as the name of a bacterial genus	0.571191
Derideptis	fem. n.	A word arbitrarily created as the name of a bacterial genus	0.807098
Matarectio	fem. n.	A word arbitrarily created as the name of a bacterial genus	0.30988
Semodella	fem. n.	A word arbitrarily created as the name of a bacterial genus	0.0211382
Tuberentia	fem. n.	A word arbitrarily created as the name of a bacterial genus	0.602489
Calorellio	fem. n.	A word arbitrarily created as the name of a bacterial genus	0.840077
Exarcicula	fem. n.	A word arbitrarily created as the name of a bacterial genus	0.127726
Musiciquia	fem. n.	A word arbitrarily created as the name of a bacterial genus	0.464187
Amianagena	fem. n.	A word arbitrarily created as the name of a bacterial genus	0.187818
Defecia	fem. n.	A word arbitrarily created as the name of a bacterial genus	0.260635
Enigmadema	fem. n.	A word arbitrarily created as the name of a bacterial genus	0.734758
Migalitudo	fem. n.	A word arbitrarily created as the name of a bacterial genus	0.866277
Almonitas	fem. n.	A word arbitrarily created as the name of a bacterial genus	0.388912
Scurria	fem. n.	A word arbitrarily created as the name of a bacterial genus	0.714793
Undosectio	fem. n.	A word arbitrarily created as the name of a bacterial genus	0.0939519
Essonetica	fem. n.	A word arbitrarily created as the name of a bacterial genus	0.74392
Pugilitudo	fem. n.	A word arbitrarily created as the name of a bacterial genus	0.510029
Negatectio	fem. n.	A word arbitrarily created as the name of a bacterial genus	0.446699
Teriaascua	fem. n.	A word arbitrarily created as the name of a bacterial genus	0.054528
Bicalectio	fem. n.	A word arbitrarily created as the name of a bacterial genus	0.60404
Uxorcaphia	fem. n.	A word arbitrarily created as the name of a bacterial genus	0.330716
Bdelletica	fem. n.	A word arbitrarily created as the name of a bacterial genus	0.943161
Guarriquia	fem. n.	A word arbitrarily created as the name of a bacterial genus	0.983127
Celulentia	fem. n.	A word arbitrarily created as the name of a bacterial genus	0.765396
Nocenicula	fem. n.	A word arbitrarily created as the name of a bacterial genus	0.0385805
Obligitas	fem. n.	A word arbitrarily created as the name of a bacterial genus	0.796266
Atechia	fem. n.	A word arbitrarily created as the name of a bacterial genus	0.624532
Smyrneptis	fem. n.	A word arbitrarily created as the name of a bacterial genus	0.248161
Phialitudo	fem. n.	A word arbitrarily created as the name of a bacterial genus	0.310234
Prisciquia	fem. n.	A word arbitrarily created as the name of a bacterial genus	0.313681
Pimenorea	fem. n.	A word arbitrarily created as the name of a bacterial genus	0.238834
Syrusilago	fem. n.	A word arbitrarily created as the name of a bacterial genus	0.221241
Fetidascua	fem. n.	A word arbitrarily created as the name of a bacterial genus	0.903946
Sobolentia	fem. n.	A word arbitrarily created as the name of a bacterial genus	0.964416
Nominaphia	fem. n.	A word arbitrarily created as the name of a bacterial genus	0.897956
Thracitudo	fem. n.	A word arbitrarily created as the name of a bacterial genus	0.856805
Priusitas	fem. n.	A word arbitrarily created as the name of a bacterial genus	0.640986
Cohibagena	fem. n.	A word arbitrarily created as the name of a bacterial genus	0.111033
Obtusatrix	fem. n.	A word arbitrarily created as the name of a bacterial genus	0.974931
Lusoricula	fem. n.	A word arbitrarily created as the name of a bacterial genus	0.915535
Rubiciquia	fem. n.	A word arbitrarily created as the name of a bacterial genus	0.731637
Bajuliquia	fem. n.	A word arbitrarily created as the name of a bacterial genus	0.805082
Apochaphia	fem. n.	A word arbitrarily created as the name of a bacterial genus	0.806127
Facililago	fem. n.	A word arbitrarily created as the name of a bacterial genus	0.224712
Redomagena	fem. n.	A word arbitrarily created as the name of a bacterial genus	0.719471
Choenagena	fem. n.	A word arbitrarily created as the name of a bacterial genus	0.608411
Complascua	fem. n.	A word arbitrarily created as the name of a bacterial genus	0.734318
Eruptascua	fem. n.	A word arbitrarily created as the name of a bacterial genus	0.546296
Artufitudo	fem. n.	A word arbitrarily created as the name of a bacterial genus	0.351779
Cubanilago	fem. n.	A word arbitrarily created as the name of a bacterial genus	0.76486
Inraella	fem. n.	A word arbitrarily created as the name of a bacterial genus	0.303135
Cerebaphia	fem. n.	A word arbitrarily created as the name of a bacterial genus	0.721175
Bucolorea	fem. n.	A word arbitrarily created as the name of a bacterial genus	0.170697
Cibusilago	fem. n.	A word arbitrarily created as the name of a bacterial genus	0.141872
Histractea	fem. n.	A word arbitrarily created as the name of a bacterial genus	0.618949
Dibapatrix	fem. n.	A word arbitrarily created as the name of a bacterial genus	0.0523111
Chaeraria	fem. n.	A word arbitrarily created as the name of a bacterial genus	0.90027
Libeladema	fem. n.	A word arbitrarily created as the name of a bacterial genus	0.684693
Aigilutela	fem. n.	A word arbitrarily created as the name of a bacterial genus	0.0133399
Avernadema	fem. n.	A word arbitrarily created as the name of a bacterial genus	0.912733
Avoncicula	fem. n.	A word arbitrarily created as the name of a bacterial genus	0.299288
Supelaphia	fem. n.	A word arbitrarily created as the name of a bacterial genus	0.334267
Pragmetica	fem. n.	A word arbitrarily created as the name of a bacterial genus	0.030667
Narisiquia	fem. n.	A word arbitrarily created as the name of a bacterial genus	0.296396
Positorea	fem. n.	A word arbitrarily created as the name of a bacterial genus	0.384948
Andeniquia	fem. n.	A word arbitrarily created as the name of a bacterial genus	0.613768
Talusicula	fem. n.	A word arbitrarily created as the name of a bacterial genus	0.50914
Inpubectio	fem. n.	A word arbitrarily created as the name of a bacterial genus	0.517911
Addenellio	fem. n.	A word arbitrarily created as the name of a bacterial genus	0.748828
Psithitudo	fem. n.	A word arbitrarily created as the name of a bacterial genus	0.816933
Colymia	fem. n.	A word arbitrarily created as the name of a bacterial genus	0.00615605
Aptuseptis	fem. n.	A word arbitrarily created as the name of a bacterial genus	0.401772
Retunorea	fem. n.	A word arbitrarily created as the name of a bacterial genus	0.840146
Lamedagena	fem. n.	A word arbitrarily created as the name of a bacterial genus	0.63598
Oceanitudo	fem. n.	A word arbitrarily created as the name of a bacterial genus	0.617816
Murusentia	fem. n.	A word arbitrarily created as the name of a bacterial genus	0.270668
Bananutela	fem. n.	A word arbitrarily created as the name of a bacterial genus	0.865314
Conscarisa	fem. n.	A word arbitrarily created as the name of a bacterial genus	0.336554
Accidascua	fem. n.	A word arbitrarily created as the name of a bacterial genus	0.138295
Coperorea	fem. n.	A word arbitrarily created as the name of a bacterial genus	0.286563
Aedesactea	fem. n.	A word arbitrarily created as the name of a bacterial genus	0.319962
Accanaphia	fem. n.	A word arbitrarily created as the name of a bacterial genus	0.477659
Apsycicula	fem. n.	A word arbitrarily created as the name of a bacterial genus	0.0798173
Naenatrix	fem. n.	A word arbitrarily created as the name of a bacterial genus	0.725204
Boethascua	fem. n.	A word arbitrarily created as the name of a bacterial genus	0.729363
Fluctetica	fem. n.	A word arbitrarily created as the name of a bacterial genus	0.860349
Curiaectio	fem. n.	A word arbitrarily created as the name of a bacterial genus	0.689087
Limenectio	fem. n.	A word arbitrarily created as the name of a bacterial genus	0.165065
Viminia	fem. n.	A word arbitrarily created as the name of a bacterial genus	0.887648
Sucularisa	fem. n.	A word arbitrarily created as the name of a bacterial genus	0.660916
Pyritascua	fem. n.	A word arbitrarily created as the name of a bacterial genus	0.345382
Croysactea	fem. n.	A word arbitrarily created as the name of a bacterial genus	0.361854
Carecicula	fem. n.	A word arbitrarily created as the name of a bacterial genus	0.744327
Rivalascua	fem. n.	A word arbitrarily created as the name of a bacterial genus	0.243851
Aptusetica	fem. n.	A word arbitrarily created as the name of a bacterial genus	0.0404297
Tuteliquia	fem. n.	A word arbitrarily created as the name of a bacterial genus	0.212901
Retaretica	fem. n.	A word arbitrarily created as the name of a bacterial genus	0.191251
Defugagena	fem. n.	A word arbitrarily created as the name of a bacterial genus	0.370363
Subscentia	fem. n.	A word arbitrarily created as the name of a bacterial genus	0.679804
Cabusentia	fem. n.	A word arbitrarily created as the name of a bacterial genus	0.697506
Tranqaria	fem. n.	A word arbitrarily created as the name of a bacterial genus	0.922869
Visailago	fem. n.	A word arbitrarily created as the name of a bacterial genus	0.959108
Neutrascua	fem. n.	A word arbitrarily created as the name of a bacterial genus	0.426886
Buxifarisa	fem. n.	A word arbitrarily created as the name of a bacterial genus	0.465474
Opistatrix	fem. n.	A word arbitrarily created as the name of a bacterial genus	0.432474
Castrascua	fem. n.	A word arbitrarily created as the name of a bacterial genus	0.223845
Venabarisa	fem. n.	A word arbitrarily created as the name of a bacterial genus	0.915742
Auletadema	fem. n.	A word arbitrarily created as the name of a bacterial genus	0.685023
Eusebellio	fem. n.	A word arbitrarily created as the name of a bacterial genus	0.828149
Apogrilago	fem. n.	A word arbitrarily created as the name of a bacterial genus	0.688819
Ervilia	fem. n.	A word arbitrarily created as the name of a bacterial genus	0.797876
Abascitudo	fem. n.	A word arbitrarily created as the name of a bacterial genus	0.00571889
Melautela	fem. n.	A word arbitrarily created as the name of a bacterial genus	0.147699
Tutelitudo	fem. n.	A word arbitrarily created as the name of a bacterial genus	0.494754
Tocularisa	fem. n.	A word arbitrarily created as the name of a bacterial genus	0.979903
Theatutela	fem. n.	A word arbitrarily created as the name of a bacterial genus	0.295262
Pomosadema	fem. n.	A word arbitrarily created as the name of a bacterial genus	0.264349
Venucatrix	fem. n.	A word arbitrarily created as the name of a bacterial genus	0.687567
Adnaicula	fem. n.	A word arbitrarily created as the name of a bacterial genus	0.831014
Duramarisa	fem. n.	A word arbitrarily created as the name of a bacterial genus	0.465862
Linaarisa	fem. n.	A word arbitrarily created as the name of a bacterial genus	0.707684
Nitorectio	fem. n.	A word arbitrarily created as the name of a bacterial genus	0.665865
Apochitudo	fem. n.	A word arbitrarily created as the name of a bacterial genus	0.213435
Saecletica	fem. n.	A word arbitrarily created as the name of a bacterial genus	0.302253
Deforia	fem. n.	A word arbitrarily created as the name of a bacterial genus	0.370435
Lyricia	fem. n.	A word arbitrarily created as the name of a bacterial genus	0.453882
Sonipitudo	fem. n.	A word arbitrarily created as the name of a bacterial genus	0.0320736
Lanarentia	fem. n.	A word arbitrarily created as the name of a bacterial genus	0.843727
Simenectio	fem. n.	A word arbitrarily created as the name of a bacterial genus	0.726096
Susicicula	fem. n.	A word arbitrarily created as the name of a bacterial genus	0.604046
Maxaellio	fem. n.	A word arbitrarily created as the name of a bacterial genus	0.357423
Laxamorea	fem. n.	A word arbitrarily created as the name of a bacterial genus	0.70315
Euroceptis	fem. n.	A word arbitrarily created as the name of a bacterial genus	0.285647
Tenuradema	fem. n.	A word arbitrarily created as the name of a bacterial genus	0.123552
Teterascua	fem. n.	A word arbitrarily created as the name of a bacterial genus	0.00182698
Quandiquia	fem. n.	A word arbitrarily created as the name of a bacterial genus	0.0878348
Ciborellio	fem. n.	A word arbitrarily created as the name of a bacterial genus	0.433583
Gasaarisa	fem. n.	A word arbitrarily created as the name of a bacterial genus	0.163636
Cocodetica	fem. n.	A word arbitrarily created as the name of a bacterial genus	0.303865
Episcorea	fem. n.	A word arbitrarily created as the name of a bacterial genus	0.677316
Scribilago	fem. n.	A word arbitrarily created as the name of a bacterial genus	0.457571
Castradema	fem. n.	A word arbitrarily created as the name of a bacterial genus	0.867074
Thaspellio	fem. n.	A word arbitrarily created as the name of a bacterial genus	0.509608
Aemilutela	fem. n.	A word arbitrarily created as the name of a bacterial genus	0.891262
Scymnitas	fem. n.	A word arbitrarily created as the name of a bacterial genus	0.715793
Depubadema	fem. n.	A word arbitrarily created as the name of a bacterial genus	0.557367
Surusaria	fem. n.	A word arbitrarily created as the name of a bacterial genus	0.431648
Tresventia	fem. n.	A word arbitrarily created as the name of a bacterial genus	0.431717
Adcubellio	fem. n.	A word arbitrarily created as the name of a bacterial genus	0.433545
Lacineptis	fem. n.	A word arbitrarily created as the name of a bacterial genus	0.356087
Homulascua	fem. n.	A word arbitrarily created as the name of a bacterial genus	0.118759
Paeanella	fem. n.	A word arbitrarily created as the name of a bacterial genus	0.736773
Exaudella	fem. n.	A word arbitrarily created as the name of a bacterial genus	0.869762
Arvigilago	fem. n.	A word arbitrarily created as the name of a bacterial genus	0.369335
Papilella	fem. n.	A word arbitrarily created as the name of a bacterial genus	0.99204
Georgetica	fem. n.	A word arbitrarily created as the name of a bacterial genus	0.340349
Hyraxaria	fem. n.	A word arbitrarily created as the name of a bacterial genus	0.64015
Rapidorea	fem. n.	A word arbitrarily created as the name of a bacterial genus	0.92341
Arnacactea	fem. n.	A word arbitrarily created as the name of a bacterial genus	0.0390354
Dimenaria	fem. n.	A word arbitrarily created as the name of a bacterial genus	0.520741
Nurusitas	fem. n.	A word arbitrarily created as the name of a bacterial genus	0.682513
Reticatrix	fem. n.	A word arbitrarily created as the name of a bacterial genus	0.461833
Fimbrellio	fem. n.	A word arbitrarily created as the name of a bacterial genus	0.10244
Scholarisa	fem. n.	A word arbitrarily created as the name of a bacterial genus	0.604814
Obducutela	fem. n.	A word arbitrarily created as the name of a bacterial genus	0.153773
Gasomicula	fem. n.	A word arbitrarily created as the name of a bacterial genus	0.391235
Carecagena	fem. n.	A word arbitrarily created as the name of a bacterial genus	0.728871
Cholreptis	fem. n.	A word arbitrarily created as the name of a bacterial genus	0.129739
Broccactea	fem. n.	A word arbitrarily created as the name of a bacterial genus	0.317427
Faguseptis	fem. n.	A word arbitrarily created as the name of a bacterial genus	0.313809
Lemanagena	fem. n.	A word arbitrarily created as the name of a bacterial genus	0.823735
Efficascua	fem. n.	A word arbitrarily created as the name of a bacterial genus	0.0129263
Acustaria	fem. n.	A word arbitrarily created as the name of a bacterial genus	0.671937
Laserellio	fem. n.	A word arbitrarily created as the name of a bacterial genus	0.0259347
Cibicella	fem. n.	A word arbitrarily created as the name of a bacterial genus	0.244475
Fixateptis	fem. n.	A word arbitrarily created as the name of a bacterial genus	0.163713
Oleagaphia	fem. n.	A word arbitrarily created as the name of a bacterial genus	0.0277908
Lazuliquia	fem. n.	A word arbitrarily created as the name of a bacterial genus	0.580549
Bocasagena	fem. n.	A word arbitrarily created as the name of a bacterial genus	0.960876
Euhanella	fem. n.	A word arbitrarily created as the name of a bacterial genus	0.574588
Resesellio	fem. n.	A word arbitrarily created as the name of a bacterial genus	0.831063
Offucitas	fem. n.	A word arbitrarily created as the name of a bacterial genus	0.282183
Aristorea	fem. n.	A word arbitrarily created as the name of a bacterial genus	0.914851
Aedusella	fem. n.	A word arbitrarily created as the name of a bacterial genus	0.849181
Fetulellio	fem. n.	A word arbitrarily created as the name of a bacterial genus	0.666255
Ignicagena	fem. n.	A word arbitrarily created as the name of a bacterial genus	0.819398
Velocagena	fem. n.	A word arbitrarily created as the name of a bacterial genus	0.508717
Toruseptis	fem. n.	A word arbitrarily created as the name of a bacterial genus	0.24914
Aiensellio	fem. n.	A word arbitrarily created as the name of a bacterial genus	0.480552
Mimogascua	fem. n.	A word arbitrarily created as the name of a bacterial genus	0.32772
Optailago	fem. n.	A word arbitrarily created as the name of a bacterial genus	0.317161
Cadivellio	fem. n.	A word arbitrarily created as the name of a bacterial genus	0.863407
Sofisentia	fem. n.	A word arbitrarily created as the name of a bacterial genus	0.711331
Tonosia	fem. n.	A word arbitrarily created as the name of a bacterial genus	0.917202
Addenatrix	fem. n.	A word arbitrarily created as the name of a bacterial genus	0.848559
Feralatrix	fem. n.	A word arbitrarily created as the name of a bacterial genus	0.807281
Inrecadema	fem. n.	A word arbitrarily created as the name of a bacterial genus	0.901994
Aiensagena	fem. n.	A word arbitrarily created as the name of a bacterial genus	0.941113
Osculectio	fem. n.	A word arbitrarily created as the name of a bacterial genus	0.261819
Armamutela	fem. n.	A word arbitrarily created as the name of a bacterial genus	0.141854
Lenimitudo	fem. n.	A word arbitrarily created as the name of a bacterial genus	0.016187
Aucelagena	fem. n.	A word arbitrarily created as the name of a bacterial genus	0.543828
Lubenatrix	fem. n.	A word arbitrarily created as the name of a bacterial genus	0.0125517
Bajulella	fem. n.	A word arbitrarily created as the name of a bacterial genus	0.953645
Libycagena	fem. n.	A word arbitrarily created as the name of a bacterial genus	0.577104
Inridiquia	fem. n.	A word arbitrarily created as the name of a bacterial genus	0.909581
Nazoriquia	fem. n.	A word arbitrarily created as the name of a bacterial genus	0.963543
Sofisorea	fem. n.	A word arbitrarily created as the name of a bacterial genus	0.790304
Bipaladema	fem. n.	A word arbitrarily created as the name of a bacterial genus	0.688533
Buxosicula	fem. n.	A word arbitrarily created as the name of a bacterial genus	0.927661
Nidifatrix	fem. n.	A word arbitrarily created as the name of a bacterial genus	0.420753
Utputetica	fem. n.	A word arbitrarily created as the name of a bacterial genus	0.766843
Areolella	fem. n.	A word arbitrarily created as the name of a bacterial genus	0.673857
Amianitudo	fem. n.	A word arbitrarily created as the name of a bacterial genus	0.992015
Emissorea	fem. n.	A word arbitrarily created as the name of a bacterial genus	0.597063
Spurciquia	fem. n.	A word arbitrarily created as the name of a bacterial genus	0.45955
Isoscitas	fem. n.	A word arbitrarily created as the name of a bacterial genus	0.228555
Effecilago	fem. n.	A word arbitrarily created as the name of a bacterial genus	0.224696
Calthentia	fem. n.	A word arbitrarily created as the name of a bacterial genus	0.180649
Utpotilago	fem. n.	A word arbitrarily created as the name of a bacterial genus	0.863233
Ansarilago	fem. n.	A word arbitrarily created as the name of a bacterial genus	0.193664
Senacilago	fem. n.	A word arbitrarily created as the name of a bacterial genus	0.916816
Cerebutela	fem. n.	A word arbitrarily created as the name of a bacterial genus	0.562861
Abbasellio	fem. n.	A word arbitrarily created as the name of a bacterial genus	0.848038
Bovicatrix	fem. n.	A word arbitrarily created as the name of a bacterial genus	0.358941
Denomia	fem. n.	A word arbitrarily created as the name of a bacterial genus	0.390125
Ditatetica	fem. n.	A word arbitrarily created as the name of a bacterial genus	0.964579
Amictia	fem. n.	A word arbitrarily created as the name of a bacterial genus	0.297298
Prophellio	fem. n.	A word arbitrarily created as the name of a bacterial genus	0.567383
Aaatascua	fem. n.	A word arbitrarily created as the name of a bacterial genus	0.96071
Brasmadema	fem. n.	A word arbitrarily created as the name of a bacterial genus	0.624321
Punusatrix	fem. n.	A word arbitrarily created as the name of a bacterial genus	0.0633558
Benedarisa	fem. n.	A word arbitrarily created as the name of a bacterial genus	0.154898
Cymulella	fem. n.	A word arbitrarily created as the name of a bacterial genus	0.540704
Corchia	fem. n.	A word arbitrarily created as the name of a bacterial genus	0.395388
Reducectio	fem. n.	A word arbitrarily created as the name of a bacterial genus	0.303497
Epopsectio	fem. n.	A word arbitrarily created as the name of a bacterial genus	0.897807
Pixisilago	fem. n.	A word arbitrarily created as the name of a bacterial genus	0.976392
Aululitudo	fem. n.	A word arbitrarily created as the name of a bacterial genus	0.230472
Aberradema	fem. n.	A word arbitrarily created as the name of a bacterial genus	0.943967
Croysascua	fem. n.	A word arbitrarily created as the name of a bacterial genus	0.594864
Latebarisa	fem. n.	A word arbitrarily created as the name of a bacterial genus	0.729497
Modicaria	fem. n.	A word arbitrarily created as the name of a bacterial genus	0.956778
Tutamitas	fem. n.	A word arbitrarily created as the name of a bacterial genus	0.662315
Racanentia	fem. n.	A word arbitrarily created as the name of a bacterial genus	0.00894989
Localitas	fem. n.	A word arbitrarily created as the name of a bacterial genus	0.562465
Opporectio	fem. n.	A word arbitrarily created as the name of a bacterial genus	0.480432
Aemileptis	fem. n.	A word arbitrarily created as the name of a bacterial genus	0.21077
Obsidarisa	fem. n.	A word arbitrarily created as the name of a bacterial genus	0.484453
Abdicadema	fem. n.	A word arbitrarily created as the name of a bacterial genus	0.285555
Felesia	fem. n.	A word arbitrarily created as the name of a bacterial genus	0.123067
Anaudadema	fem. n.	A word arbitrarily created as the name of a bacterial genus	0.419887
Naiaarisa	fem. n.	A word arbitrarily created as the name of a bacterial genus	0.5973
Podexitudo	fem. n.	A word arbitrarily created as the name of a bacterial genus	0.994955
Subigascua	fem. n.	A word arbitrarily created as the name of a bacterial genus	0.00087027
Faginaphia	fem. n.	A word arbitrarily created as the name of a bacterial genus	0.454804
Vigilagena	fem. n.	A word arbitrarily created as the name of a bacterial genus	0.0938907
Sulphorea	fem. n.	A word arbitrarily created as the name of a bacterial genus	0.0447422
Berylaphia	fem. n.	A word arbitrarily created as the name of a bacterial genus	0.227152
Atracentia	fem. n.	A word arbitrarily created as the name of a bacterial genus	0.7843
Togatactea	fem. n.	A word arbitrarily created as the name of a bacterial genus	0.156536
Amoebaria	fem. n.	A word arbitrarily created as the name of a bacterial genus	0.626107
Remulactea	fem. n.	A word arbitrarily created as the name of a bacterial genus	0.140359
Ciconactea	fem. n.	A word arbitrarily created as the name of a bacterial genus	0.744682
Rutilitudo	fem. n.	A word arbitrarily created as the name of a bacterial genus	0.790611
Acrufitas	fem. n.	A word arbitrarily created as the name of a bacterial genus	0.821775
Pubenarisa	fem. n.	A word arbitrarily created as the name of a bacterial genus	0.746387
Solstectio	fem. n.	A word arbitrarily created as the name of a bacterial genus	0.699818
Plasiicula	fem. n.	A word arbitrarily created as the name of a bacterial genus	0.835532
Coaeqagena	fem. n.	A word arbitrarily created as the name of a bacterial genus	0.955694
Stercadema	fem. n.	A word arbitrarily created as the name of a bacterial genus	0.421051
Adrogectio	fem. n.	A word arbitrarily created as the name of a bacterial genus	0.270687
Duavitas	fem. n.	A word arbitrarily created as the name of a bacterial genus	0.75685
Refugella	fem. n.	A word arbitrarily created as the name of a bacterial genus	0.30544
Saturicula	fem. n.	A word arbitrarily created as the name of a bacterial genus	0.173438
Praebitudo	fem. n.	A word arbitrarily created as the name of a bacterial genus	0.112966
Barycellio	fem. n.	A word arbitrarily created as the name of a bacterial genus	0.135567
Atricicula	fem. n.	A word arbitrarily created as the name of a bacterial genus	0.525067
Amoebia	fem. n.	A word arbitrarily created as the name of a bacterial genus	0.667276
Sarabutela	fem. n.	A word arbitrarily created as the name of a bacterial genus	0.559042
Desubella	fem. n.	A word arbitrarily created as the name of a bacterial genus	0.245414
Hinulia	fem. n.	A word arbitrarily created as the name of a bacterial genus	0.839162
Mucusentia	fem. n.	A word arbitrarily created as the name of a bacterial genus	0.5441
Adsocia	fem. n.	A word arbitrarily created as the name of a bacterial genus	0.437207
Aetomarisa	fem. n.	A word arbitrarily created as the name of a bacterial genus	0.152986
Thapsellio	fem. n.	A word arbitrarily created as the name of a bacterial genus	0.29742
Grallellio	fem. n.	A word arbitrarily created as the name of a bacterial genus	0.532185
Exhibellio	fem. n.	A word arbitrarily created as the name of a bacterial genus	0.294905
Dedolagena	fem. n.	A word arbitrarily created as the name of a bacterial genus	0.105107
Insubitas	fem. n.	A word arbitrarily created as the name of a bacterial genus	0.65272
Fericascua	fem. n.	A word arbitrarily created as the name of a bacterial genus	0.431064
Rogalorea	fem. n.	A word arbitrarily created as the name of a bacterial genus	0.494589
Dipthagena	fem. n.	A word arbitrarily created as the name of a bacterial genus	0.0669352
Adcolagena	fem. n.	A word arbitrarily created as the name of a bacterial genus	0.50452
Sinaeptis	fem. n.	A word arbitrarily created as the name of a bacterial genus	0.668899
Hemeritas	fem. n.	A word arbitrarily created as the name of a bacterial genus	0.412905
Amiaectio	fem. n.	A word arbitrarily created as the name of a bacterial genus	0.0443786
Inmobilago	fem. n.	A word arbitrarily created as the name of a bacterial genus	0.836746
Rarefiquia	fem. n.	A word arbitrarily created as the name of a bacterial genus	0.907451
Coximiquia	fem. n.	A word arbitrarily created as the name of a bacterial genus	0.578648
Ineffellio	fem. n.	A word arbitrarily created as the name of a bacterial genus	0.190067
Intecitas	fem. n.	A word arbitrarily created as the name of a bacterial genus	0.706959
Mataractea	fem. n.	A word arbitrarily created as the name of a bacterial genus	0.499851
Vivaria	fem. n.	A word arbitrarily created as the name of a bacterial genus	0.33549
Bisulella	fem. n.	A word arbitrarily created as the name of a bacterial genus	0.347004
Luxatiquia	fem. n.	A word arbitrarily created as the name of a bacterial genus	0.355008
Curabaphia	fem. n.	A word arbitrarily created as the name of a bacterial genus	0.0383443
Masocilago	fem. n.	A word arbitrarily created as the name of a bacterial genus	0.815764
Dilucascua	fem. n.	A word arbitrarily created as the name of a bacterial genus	0.2019
Allobatrix	fem. n.	A word arbitrarily created as the name of a bacterial genus	0.0662692
Cambreptis	fem. n.	A word arbitrarily created as the name of a bacterial genus	0.881336
Saceliquia	fem. n.	A word arbitrarily created as the name of a bacterial genus	0.347146
Temerascua	fem. n.	A word arbitrarily created as the name of a bacterial genus	0.235579
Harenella	fem. n.	A word arbitrarily created as the name of a bacterial genus	0.0802924
Impolitudo	fem. n.	A word arbitrarily created as the name of a bacterial genus	0.28056
Buculentia	fem. n.	A word arbitrarily created as the name of a bacterial genus	0.784585
Analpitas	fem. n.	A word arbitrarily created as the name of a bacterial genus	0.988475
Caussentia	fem. n.	A word arbitrarily created as the name of a bacterial genus	0.632466
Elytrentia	fem. n.	A word arbitrarily created as the name of a bacterial genus	0.849921
Problutela	fem. n.	A word arbitrarily created as the name of a bacterial genus	0.569937
Obligagena	fem. n.	A word arbitrarily created as the name of a bacterial genus	0.673611
Gadusentia	fem. n.	A word arbitrarily created as the name of a bacterial genus	0.0176964
Cohaeptis	fem. n.	A word arbitrarily created as the name of a bacterial genus	0.236574
Blaspella	fem. n.	A word arbitrarily created as the name of a bacterial genus	0.411057
Calabactea	fem. n.	A word arbitrarily created as the name of a bacterial genus	0.624341
Abrodatrix	fem. n.	A word arbitrarily created as the name of a bacterial genus	0.27652
Adtacicula	fem. n.	A word arbitrarily created as the name of a bacterial genus	0.952737
Bonaectio	fem. n.	A word arbitrarily created as the name of a bacterial genus	0.51641
Crescectio	fem. n.	A word arbitrarily created as the name of a bacterial genus	0.214597
Cautreptis	fem. n.	A word arbitrarily created as the name of a bacterial genus	0.5731
Biferaphia	fem. n.	A word arbitrarily created as the name of a bacterial genus	0.855439
Ramosentia	fem. n.	A word arbitrarily created as the name of a bacterial genus	0.597657
Veliaeptis	fem. n.	A word arbitrarily created as the name of a bacterial genus	0.975733
Amystetica	fem. n.	A word arbitrarily created as the name of a bacterial genus	0.856345
Cylonascua	fem. n.	A word arbitrarily created as the name of a bacterial genus	0.00890947
Obtusagena	fem. n.	A word arbitrarily created as the name of a bacterial genus	0.743205
Memororea	fem. n.	A word arbitrarily created as the name of a bacterial genus	0.367213
Extimella	fem. n.	A word arbitrarily created as the name of a bacterial genus	0.157678
Cestractea	fem. n.	A word arbitrarily created as the name of a bacterial genus	0.260806
Nuditilago	fem. n.	A word arbitrarily created as the name of a bacterial genus	0.387494
Neciaectio	fem. n.	A word arbitrarily created as the name of a bacterial genus	0.77729
Descraria	fem. n.	A word arbitrarily created as the name of a bacterial genus	0.262562
Elytrella	fem. n.	A word arbitrarily created as the name of a bacterial genus	0.874668
Accidadema	fem. n.	A word arbitrarily created as the name of a bacterial genus	0.959504
Pentritudo	fem. n.	A word arbitrarily created as the name of a bacterial genus	0.773915
Litigilago	fem. n.	A word arbitrarily created as the name of a bacterial genus	0.955475
Adtonetica	fem. n.	A word arbitrarily created as the name of a bacterial genus	0.110843
Cytopitudo	fem. n.	A word arbitrarily created as the name of a bacterial genus	0.615043
Libeliquia	fem. n.	A word arbitrarily created as the name of a bacterial genus	0.320532
Sisamitudo	fem. n.	A word arbitrarily created as the name of a bacterial genus	0.422185
Medulella	fem. n.	A word arbitrarily created as the name of a bacterial genus	0.221665
Doxolatrix	fem. n.	A word arbitrarily created as the name of a bacterial genus	0.182438
Dilucutela	fem. n.	A word arbitrarily created as the name of a bacterial genus	0.569644
Adipsatrix	fem. n.	A word arbitrarily created as the name of a bacterial genus	0.259248
Pelagatrix	fem. n.	A word arbitrarily created as the name of a bacterial genus	0.790592
Nadiria	fem. n.	A word arbitrarily created as the name of a bacterial genus	0.0911658
Sigarella	fem. n.	A word arbitrarily created as the name of a bacterial genus	0.664288
Mirusactea	fem. n.	A word arbitrarily created as the name of a bacterial genus	0.298208
Bolisarisa	fem. n.	A word arbitrarily created as the name of a bacterial genus	0.479941
Adaucagena	fem. n.	A word arbitrarily created as the name of a bacterial genus	0.218675
Zizyfellio	fem. n.	A word arbitrarily created as the name of a bacterial genus	0.59225
Hydolella	fem. n.	A word arbitrarily created as the name of a bacterial genus	0.642211
Quippeptis	fem. n.	A word arbitrarily created as the name of a bacterial genus	0.72087
Pageliquia	fem. n.	A word arbitrarily created as the name of a bacterial genus	0.725036
Lenunatrix	fem. n.	A word arbitrarily created as the name of a bacterial genus	0.52476
Osceneptis	fem. n.	A word arbitrarily created as the name of a bacterial genus	0.679662
Coarcella	fem. n.	A word arbitrarily created as the name of a bacterial genus	0.0321349
Moxiaorea	fem. n.	A word arbitrarily created as the name of a bacterial genus	0.64714
Gazofectio	fem. n.	A word arbitrarily created as the name of a bacterial genus	0.766871
Admodella	fem. n.	A word arbitrarily created as the name of a bacterial genus	0.278576
Tranqagena	fem. n.	A word arbitrarily created as the name of a bacterial genus	0.607084
Eunucorea	fem. n.	A word arbitrarily created as the name of a bacterial genus	0.369027
Attegaphia	fem. n.	A word arbitrarily created as the name of a bacterial genus	0.691709
Expecutela	fem. n.	A word arbitrarily created as the name of a bacterial genus	0.108983
aenseptis	fem. n.	A word arbitrarily created as the name of a bacterial genus	0.649656
Cypirella	fem. n.	A word arbitrarily created as the name of a bacterial genus	0.191894
Incidentia	fem. n.	A word arbitrarily created as the name of a bacterial genus	0.708551
Ossicilago	fem. n.	A word arbitrarily created as the name of a bacterial genus	0.110113
Bimemitudo	fem. n.	A word arbitrarily created as the name of a bacterial genus	0.879737
Xeresagena	fem. n.	A word arbitrarily created as the name of a bacterial genus	0.035124
Aegidorea	fem. n.	A word arbitrarily created as the name of a bacterial genus	0.578809
Arveraria	fem. n.	A word arbitrarily created as the name of a bacterial genus	0.767373
Theocilago	fem. n.	A word arbitrarily created as the name of a bacterial genus	0.961921
Agricella	fem. n.	A word arbitrarily created as the name of a bacterial genus	0.454461
Desubia	fem. n.	A word arbitrarily created as the name of a bacterial genus	0.572879
Serapactea	fem. n.	A word arbitrarily created as the name of a bacterial genus	0.967286
Algoritudo	fem. n.	A word arbitrarily created as the name of a bacterial genus	0.278239
Veracitas	fem. n.	A word arbitrarily created as the name of a bacterial genus	0.928058
Ligamatrix	fem. n.	A word arbitrarily created as the name of a bacterial genus	0.660076
Cestrellio	fem. n.	A word arbitrarily created as the name of a bacterial genus	0.538713
Madefiquia	fem. n.	A word arbitrarily created as the name of a bacterial genus	0.989505
Enucleptis	fem. n.	A word arbitrarily created as the name of a bacterial genus	0.335686
Filicella	fem. n.	A word arbitrarily created as the name of a bacterial genus	0.183934
Devasia	fem. n.	A word arbitrarily created as the name of a bacterial genus	0.768753
Amethectio	fem. n.	A word arbitrarily created as the name of a bacterial genus	0.126225
Denthitudo	fem. n.	A word arbitrarily created as the name of a bacterial genus	0.691642
Apstritas	fem. n.	A word arbitrarily created as the name of a bacterial genus	0.785449
Vagabagena	fem. n.	A word arbitrarily created as the name of a bacterial genus	0.903474
Typanarisa	fem. n.	A word arbitrarily created as the name of a bacterial genus	0.843423
Aptataria	fem. n.	A word arbitrarily created as the name of a bacterial genus	0.582413
Gabinactea	fem. n.	A word arbitrarily created as the name of a bacterial genus	0.57359
Priscaphia	fem. n.	A word arbitrarily created as the name of a bacterial genus	0.730255
Exedria	fem. n.	A word arbitrarily created as the name of a bacterial genus	0.498101
Graulascua	fem. n.	A word arbitrarily created as the name of a bacterial genus	0.675999
Hacelella	fem. n.	A word arbitrarily created as the name of a bacterial genus	0.260439
Sudisilago	fem. n.	A word arbitrarily created as the name of a bacterial genus	0.476288
Graecella	fem. n.	A word arbitrarily created as the name of a bacterial genus	0.715491
Retoritudo	fem. n.	A word arbitrarily created as the name of a bacterial genus	0.306901
Hapalia	fem. n.	A word arbitrarily created as the name of a bacterial genus	0.966248
Favusitas	fem. n.	A word arbitrarily created as the name of a bacterial genus	0.930803
Dioclatrix	fem. n.	A word arbitrarily created as the name of a bacterial genus	0.473274
Sodesutela	fem. n.	A word arbitrarily created as the name of a bacterial genus	0.52755
Zetarorea	fem. n.	A word arbitrarily created as the name of a bacterial genus	0.279611
Holisadema	fem. n.	A word arbitrarily created as the name of a bacterial genus	0.946266
Macilaphia	fem. n.	A word arbitrarily created as the name of a bacterial genus	0.260367
Organitudo	fem. n.	A word arbitrarily created as the name of a bacterial genus	0.234018
Incubadema	fem. n.	A word arbitrarily created as the name of a bacterial genus	0.348736
Sinaputela	fem. n.	A word arbitrarily created as the name of a bacterial genus	0.893597
Neutritas	fem. n.	A word arbitrarily created as the name of a bacterial genus	0.0643171
Undeceptis	fem. n.	A word arbitrarily created as the name of a bacterial genus	0.0919742
Rasoraphia	fem. n.	A word arbitrarily created as the name of a bacterial genus	0.60355
Rigaticula	fem. n.	A word arbitrarily created as the name of a bacterial genus	0.54229
Negatiquia	fem. n.	A word arbitrarily created as the name of a bacterial genus	0.537438
Bacalaria	fem. n.	A word arbitrarily created as the name of a bacterial genus	0.187832
Laganarisa	fem. n.	A word arbitrarily created as the name of a bacterial genus	0.395367
Venucutela	fem. n.	A word arbitrarily created as the name of a bacterial genus	0.691293
Escararia	fem. n.	A word arbitrarily created as the name of a bacterial genus	0.526794
Majaeptis	fem. n.	A word arbitrarily created as the name of a bacterial genus	0.516306
Vixiailago	fem. n.	A word arbitrarily created as the name of a bacterial genus	0.0202981
Posititudo	fem. n.	A word arbitrarily created as the name of a bacterial genus	0.435269
Pimenilago	fem. n.	A word arbitrarily created as the name of a bacterial genus	0.742329
Botanorea	fem. n.	A word arbitrarily created as the name of a bacterial genus	0.924869
Intecagena	fem. n.	A word arbitrarily created as the name of a bacterial genus	0.838418
Balucellio	fem. n.	A word arbitrarily created as the name of a bacterial genus	0.302127
Acontiquia	fem. n.	A word arbitrarily created as the name of a bacterial genus	0.123042
Essedilago	fem. n.	A word arbitrarily created as the name of a bacterial genus	0.0714762
Itemiagena	fem. n.	A word arbitrarily created as the name of a bacterial genus	0.695885
Adjaceptis	fem. n.	A word arbitrarily created as the name of a bacterial genus	0.449723
Functiquia	fem. n.	A word arbitrarily created as the name of a bacterial genus	0.601242
Supiniquia	fem. n.	A word arbitrarily created as the name of a bacterial genus	0.167993
Exsanilago	fem. n.	A word arbitrarily created as the name of a bacterial genus	0.308606
Papaleptis	fem. n.	A word arbitrarily created as the name of a bacterial genus	0.0272249
Taororea	fem. n.	A word arbitrarily created as the name of a bacterial genus	0.171499
Ferenascua	fem. n.	A word arbitrarily created as the name of a bacterial genus	0.0216407
Botanarisa	fem. n.	A word arbitrarily created as the name of a bacterial genus	0.01642
Revocagena	fem. n.	A word arbitrarily created as the name of a bacterial genus	0.951407
Oblaqagena	fem. n.	A word arbitrarily created as the name of a bacterial genus	0.121094
Situlascua	fem. n.	A word arbitrarily created as the name of a bacterial genus	0.861606
Binocellio	fem. n.	A word arbitrarily created as the name of a bacterial genus	0.279612
Habenia	fem. n.	A word arbitrarily created as the name of a bacterial genus	0.704795
Pyrenaria	fem. n.	A word arbitrarily created as the name of a bacterial genus	0.908034
Bilanitudo	fem. n.	A word arbitrarily created as the name of a bacterial genus	0.87801
Vetulicula	fem. n.	A word arbitrarily created as the name of a bacterial genus	0.235001
Trienicula	fem. n.	A word arbitrarily created as the name of a bacterial genus	0.334847
Drappilago	fem. n.	A word arbitrarily created as the name of a bacterial genus	0.790193
Logosia	fem. n.	A word arbitrarily created as the name of a bacterial genus	0.289215
Sciolarisa	fem. n.	A word arbitrarily created as the name of a bacterial genus	0.0938669
Totidatrix	fem. n.	A word arbitrarily created as the name of a bacterial genus	0.957834
Otioleptis	fem. n.	A word arbitrarily created as the name of a bacterial genus	0.236571
Geronaphia	fem. n.	A word arbitrarily created as the name of a bacterial genus	0.073706
Moderella	fem. n.	A word arbitrarily created as the name of a bacterial genus	0.799963
Scyphentia	fem. n.	A word arbitrarily created as the name of a bacterial genus	0.946094
Auginutela	fem. n.	A word arbitrarily created as the name of a bacterial genus	0.603681
Cohabaria	fem. n.	A word arbitrarily created as the name of a bacterial genus	0.297342
Ipsimellio	fem. n.	A word arbitrarily created as the name of a bacterial genus	0.876329
Amatradema	fem. n.	A word arbitrarily created as the name of a bacterial genus	0.84276
Nidoratrix	fem. n.	A word arbitrarily created as the name of a bacterial genus	0.110119
Bruchagena	fem. n.	A word arbitrarily created as the name of a bacterial genus	0.330047
Caducectio	fem. n.	A word arbitrarily created as the name of a bacterial genus	0.327484
Diluciquia	fem. n.	A word arbitrarily created as the name of a bacterial genus	0.631542
Zerotarisa	fem. n.	A word arbitrarily created as the name of a bacterial genus	0.26831
Mirifia	fem. n.	A word arbitrarily created as the name of a bacterial genus	0.362097
Vocabascua	fem. n.	A word arbitrarily created as the name of a bacterial genus	0.346839
Derogitudo	fem. n.	A word arbitrarily created as the name of a bacterial genus	0.455333
Ebiscicula	fem. n.	A word arbitrarily created as the name of a bacterial genus	0.968493
Filaeptis	fem. n.	A word arbitrarily created as the name of a bacterial genus	0.443408
Nocivia	fem. n.	A word arbitrarily created as the name of a bacterial genus	0.396246
Belivactea	fem. n.	A word arbitrarily created as the name of a bacterial genus	0.370176
Satorutela	fem. n.	A word arbitrarily created as the name of a bacterial genus	0.120481
Botelellio	fem. n.	A word arbitrarily created as the name of a bacterial genus	0.657601
Echogella	fem. n.	A word arbitrarily created as the name of a bacterial genus	0.590778
Tamararia	fem. n.	A word arbitrarily created as the name of a bacterial genus	0.696178
Vinolectio	fem. n.	A word arbitrarily created as the name of a bacterial genus	0.353084
Trochadema	fem. n.	A word arbitrarily created as the name of a bacterial genus	0.00664114
Lucidellio	fem. n.	A word arbitrarily created as the name of a bacterial genus	0.199645
Xeramaphia	fem. n.	A word arbitrarily created as the name of a bacterial genus	0.048793
Focularisa	fem. n.	A word arbitrarily created as the name of a bacterial genus	0.247131
Cariceptis	fem. n.	A word arbitrarily created as the name of a bacterial genus	0.708427
Peioractea	fem. n.	A word arbitrarily created as the name of a bacterial genus	0.620511
Scaenarisa	fem. n.	A word arbitrarily created as the name of a bacterial genus	0.254268
Quapragena	fem. n.	A word arbitrarily created as the name of a bacterial genus	0.831477
Inrecascua	fem. n.	A word arbitrarily created as the name of a bacterial genus	0.160475
Reticetica	fem. n.	A word arbitrarily created as the name of a bacterial genus	0.273016
Ephodilago	fem. n.	A word arbitrarily created as the name of a bacterial genus	0.32151
Carolorea	fem. n.	A word arbitrarily created as the name of a bacterial genus	0.892692
Ustororea	fem. n.	A word arbitrarily created as the name of a bacterial genus	0.000649205
Ecligia	fem. n.	A word arbitrarily created as the name of a bacterial genus	0.929477
Cymosella	fem. n.	A word arbitrarily created as the name of a bacterial genus	0.637561
Menapaphia	fem. n.	A word arbitrarily created as the name of a bacterial genus	0.782098
Vetulitas	fem. n.	A word arbitrarily created as the name of a bacterial genus	0.0789343
Hiberellio	fem. n.	A word arbitrarily created as the name of a bacterial genus	0.992667
Roruladema	fem. n.	A word arbitrarily created as the name of a bacterial genus	0.0930377
Tegulitudo	fem. n.	A word arbitrarily created as the name of a bacterial genus	0.779482
Elephutela	fem. n.	A word arbitrarily created as the name of a bacterial genus	0.201234
Soporellio	fem. n.	A word arbitrarily created as the name of a bacterial genus	0.815316
Demagascua	fem. n.	A word arbitrarily created as the name of a bacterial genus	0.1803
Aniatella	fem. n.	A word arbitrarily created as the name of a bacterial genus	0.421604
Arancaphia	fem. n.	A word arbitrarily created as the name of a bacterial genus	0.372293
Odollectio	fem. n.	A word arbitrarily created as the name of a bacterial genus	0.969823
Omenteptis	fem. n.	A word arbitrarily created as the name of a bacterial genus	0.25237
Viaedatrix	fem. n.	A word arbitrarily created as the name of a bacterial genus	0.177289
Bucinitas	fem. n.	A word arbitrarily created as the name of a bacterial genus	0.613418
Aptotiquia	fem. n.	A word arbitrarily created as the name of a bacterial genus	0.207373
Inabractea	fem. n.	A word arbitrarily created as the name of a bacterial genus	0.560912
Diveritas	fem. n.	A word arbitrarily created as the name of a bacterial genus	0.506469
Laenaria	fem. n.	A word arbitrarily created as the name of a bacterial genus	0.342251
Modulitas	fem. n.	A word arbitrarily created as the name of a bacterial genus	0.872929
Luxurilago	fem. n.	A word arbitrarily created as the name of a bacterial genus	0.685513
Tutelatrix	fem. n.	A word arbitrarily created as the name of a bacterial genus	0.73514
Lainentia	fem. n.	A word arbitrarily created as the name of a bacterial genus	0.181441
Romphectio	fem. n.	A word arbitrarily created as the name of a bacterial genus	0.0809477
Nugigentia	fem. n.	A word arbitrarily created as the name of a bacterial genus	0.615924
Rubicitudo	fem. n.	A word arbitrarily created as the name of a bacterial genus	0.255173
Devasellio	fem. n.	A word arbitrarily created as the name of a bacterial genus	0.282557
Seiugentia	fem. n.	A word arbitrarily created as the name of a bacterial genus	0.969301
Dibapadema	fem. n.	A word arbitrarily created as the name of a bacterial genus	0.242133
Solacia	fem. n.	A word arbitrarily created as the name of a bacterial genus	0.763356
Byzaniquia	fem. n.	A word arbitrarily created as the name of a bacterial genus	0.359305
Bulimatrix	fem. n.	A word arbitrarily created as the name of a bacterial genus	0.62434
Fausascua	fem. n.	A word arbitrarily created as the name of a bacterial genus	0.737283
Inpedatrix	fem. n.	A word arbitrarily created as the name of a bacterial genus	0.763293
Bonaiquia	fem. n.	A word arbitrarily created as the name of a bacterial genus	0.553307
Nexilascua	fem. n.	A word arbitrarily created as the name of a bacterial genus	0.254548
Arbilascua	fem. n.	A word arbitrarily created as the name of a bacterial genus	0.425414
Silabia	fem. n.	A word arbitrarily created as the name of a bacterial genus	0.18363
Curiaentia	fem. n.	A word arbitrarily created as the name of a bacterial genus	0.103365
Rufulaphia	fem. n.	A word arbitrarily created as the name of a bacterial genus	0.860912
Aemulactea	fem. n.	A word arbitrarily created as the name of a bacterial genus	0.42607
Abellaria	fem. n.	A word arbitrarily created as the name of a bacterial genus	0.811076
Beruletica	fem. n.	A word arbitrarily created as the name of a bacterial genus	0.967484
Idealetica	fem. n.	A word arbitrarily created as the name of a bacterial genus	0.905502
Crabrectio	fem. n.	A word arbitrarily created as the name of a bacterial genus	0.258701
Pelexorea	fem. n.	A word arbitrarily created as the name of a bacterial genus	0.253025
Acystaphia	fem. n.	A word arbitrarily created as the name of a bacterial genus	0.799945
Deriditudo	fem. n.	A word arbitrarily created as the name of a bacterial genus	0.792359
Saffrilago	fem. n.	A word arbitrarily created as the name of a bacterial genus	0.0910987
Dupunicula	fem. n.	A word arbitrarily created as the name of a bacterial genus	0.324547
Moraliquia	fem. n.	A word arbitrarily created as the name of a bacterial genus	0.786378
Ingenia	fem. n.	A word arbitrarily created as the name of a bacterial genus	0.0445433
Ardifactea	fem. n.	A word arbitrarily created as the name of a bacterial genus	0.743225
Latibaria	fem. n.	A word arbitrarily created as the name of a bacterial genus	0.110927
Ellebaria	fem. n.	A word arbitrarily created as the name of a bacterial genus	0.937385
Sonusutela	fem. n.	A word arbitrarily created as the name of a bacterial genus	0.685232
Anancutela	fem. n.	A word arbitrarily created as the name of a bacterial genus	0.102672
Proegetica	fem. n.	A word arbitrarily created as the name of a bacterial genus	0.622772
Mucorascua	fem. n.	A word arbitrarily created as the name of a bacterial genus	0.68565
Dikerella	fem. n.	A word arbitrarily created as the name of a bacterial genus	0.999743
Vinititudo	fem. n.	A word arbitrarily created as the name of a bacterial genus	0.788364
Famulutela	fem. n.	A word arbitrarily created as the name of a bacterial genus	0.916206
Estovicula	fem. n.	A word arbitrarily created as the name of a bacterial genus	0.430294
Cojecella	fem. n.	A word arbitrarily created as the name of a bacterial genus	0.715643
Sibilaria	fem. n.	A word arbitrarily created as the name of a bacterial genus	0.653448
Haorectio	fem. n.	A word arbitrarily created as the name of a bacterial genus	0.692679
Nicomectio	fem. n.	A word arbitrarily created as the name of a bacterial genus	0.306304
Voraciquia	fem. n.	A word arbitrarily created as the name of a bacterial genus	0.25211
Hasdrarisa	fem. n.	A word arbitrarily created as the name of a bacterial genus	0.849471
Maledeptis	fem. n.	A word arbitrarily created as the name of a bacterial genus	0.191192
Diogmagena	fem. n.	A word arbitrarily created as the name of a bacterial genus	0.944814
Infucutela	fem. n.	A word arbitrarily created as the name of a bacterial genus	0.310112
Enhydarisa	fem. n.	A word arbitrarily created as the name of a bacterial genus	0.372174
Bulapaphia	fem. n.	A word arbitrarily created as the name of a bacterial genus	0.21946
Vocifectio	fem. n.	A word arbitrarily created as the name of a bacterial genus	0.83203
Dehinia	fem. n.	A word arbitrarily created as the name of a bacterial genus	0.932304
Lavabiquia	fem. n.	A word arbitrarily created as the name of a bacterial genus	0.48285
Pixisella	fem. n.	A word arbitrarily created as the name of a bacterial genus	0.0686258
Alcaladema	fem. n.	A word arbitrarily created as the name of a bacterial genus	0.832416
Caetritas	fem. n.	A word arbitrarily created as the name of a bacterial genus	5.54563e-05
Futatentia	fem. n.	A word arbitrarily created as the name of a bacterial genus	0.247448
Erungactea	fem. n.	A word arbitrarily created as the name of a bacterial genus	0.066849
Necubagena	fem. n.	A word arbitrarily created as the name of a bacterial genus	0.955209
Aesaitudo	fem. n.	A word arbitrarily created as the name of a bacterial genus	0.797225
Campsarisa	fem. n.	A word arbitrarily created as the name of a bacterial genus	0.0726057
Rivuleptis	fem. n.	A word arbitrarily created as the name of a bacterial genus	0.892048
Amyctarisa	fem. n.	A word arbitrarily created as the name of a bacterial genus	0.535076
Panopascua	fem. n.	A word arbitrarily created as the name of a bacterial genus	0.918448
Motetitas	fem. n.	A word arbitrarily created as the name of a bacterial genus	0.400954
Exosteptis	fem. n.	A word arbitrarily created as the name of a bacterial genus	0.623072
Bucelitudo	fem. n.	A word arbitrarily created as the name of a bacterial genus	0.185652
Aulicatrix	fem. n.	A word arbitrarily created as the name of a bacterial genus	0.0889653
Quadria	fem. n.	A word arbitrarily created as the name of a bacterial genus	0.351155
Halatorea	fem. n.	A word arbitrarily created as the name of a bacterial genus	0.46183
Alephectio	fem. n.	A word arbitrarily created as the name of a bacterial genus	0.921234
Inrecia	fem. n.	A word arbitrarily created as the name of a bacterial genus	0.499253
Theocella	fem. n.	A word arbitrarily created as the name of a bacterial genus	0.495101
Popularisa	fem. n.	A word arbitrarily created as the name of a bacterial genus	0.759123
Dejecilago	fem. n.	A word arbitrarily created as the name of a bacterial genus	0.303778
Erythutela	fem. n.	A word arbitrarily created as the name of a bacterial genus	0.998315
Coraciquia	fem. n.	A word arbitrarily created as the name of a bacterial genus	0.873681
Istacascua	fem. n.	A word arbitrarily created as the name of a bacterial genus	0.435948
Suscrarisa	fem. n.	A word arbitrarily created as the name of a bacterial genus	0.722477
Herinutela	fem. n.	A word arbitrarily created as the name of a bacterial genus	0.115303
Paicia	fem. n.	A word arbitrarily created as the name of a bacterial genus	0.996376
Lanosetica	fem. n.	A word arbitrarily created as the name of a bacterial genus	0.929174
Gaiusellio	fem. n.	A word arbitrarily created as the name of a bacterial genus	0.130249
Durametica	fem. n.	A word arbitrarily created as the name of a bacterial genus	0.125319
Tolenilago	fem. n.	A word arbitrarily created as the name of a bacterial genus	0.853343
Avelletica	fem. n.	A word arbitrarily created as the name of a bacterial genus	0.00289929
Mineria	fem. n.	A word arbitrarily created as the name of a bacterial genus	0.851799
Cyreniquia	fem. n.	A word arbitrarily created as the name of a bacterial genus	0.445514
Flandutela	fem. n.	A word arbitrarily created as the name of a bacterial genus	0.223
Rutuletica	fem. n.	A word arbitrarily created as the name of a bacterial genus	0.18987
Grauliquia	fem. n.	A word arbitrarily created as the name of a bacterial genus	0.794732
Equulitudo	fem. n.	A word arbitrarily created as the name of a bacterial genus	0.327552
Genaascua	fem. n.	A word arbitrarily created as the name of a bacterial genus	0.98101
Vitelella	fem. n.	A word arbitrarily created as the name of a bacterial genus	0.494632
Domesicula	fem. n.	A word arbitrarily created as the name of a bacterial genus	0.111634
Venefellio	fem. n.	A word arbitrarily created as the name of a bacterial genus	0.203321
Alguseptis	fem. n.	A word arbitrarily created as the name of a bacterial genus	0.053955
Pilosadema	fem. n.	A word arbitrarily created as the name of a bacterial genus	0.214242
Odontia	fem. n.	A word arbitrarily created as the name of a bacterial genus	0.776984
Dysenellio	fem. n.	A word arbitrarily created as the name of a bacterial genus	0.82206
Direceptis	fem. n.	A word arbitrarily created as the name of a bacterial genus	0.658417
Creptascua	fem. n.	A word arbitrarily created as the name of a bacterial genus	0.536214
Naturellio	fem. n.	A word arbitrarily created as the name of a bacterial genus	0.0758321
Innociquia	fem. n.	A word arbitrarily created as the name of a bacterial genus	0.309853
Nutabella	fem. n.	A word arbitrarily created as the name of a bacterial genus	0.762306
Aprucilago	fem. n.	A word arbitrarily created as the name of a bacterial genus	0.898086
Tenilatrix	fem. n.	A word arbitrarily created as the name of a bacterial genus	0.973901
Bivirorea	fem. n.	A word arbitrarily created as the name of a bacterial genus	0.762422
Nemorectio	fem. n.	A word arbitrarily created as the name of a bacterial genus	0.533049
Bolonectio	fem. n.	A word arbitrarily created as the name of a bacterial genus	0.787172
Metonitas	fem. n.	A word arbitrarily created as the name of a bacterial genus	0.238913
Silabellio	fem. n.	A word arbitrarily created as the name of a bacterial genus	0.193842
Matulella	fem. n.	A word arbitrarily created as the name of a bacterial genus	0.50157
Duellellio	fem. n.	A word arbitrarily created as the name of a bacterial genus	0.395172
Citocitas	fem. n.	A word arbitrarily created as the name of a bacterial genus	0.872114
Obducentia	fem. n.	A word arbitrarily created as the name of a bacterial genus	0.186019
Canenetica	fem. n.	A word arbitrarily created as the name of a bacterial genus	0.395743
Copadia	fem. n.	A word arbitrarily created as the name of a bacterial genus	0.168334
Datoretica	fem. n.	A word arbitrarily created as the name of a bacterial genus	0.7419
Anamniquia	fem. n.	A word arbitrarily created as the name of a bacterial genus	0.898776
Chloradema	fem. n.	A word arbitrarily created as the name of a bacterial genus	0.253208
Inmunia	fem. n.	A word arbitrarily created as the name of a bacterial genus	0.29798
Serapatrix	fem. n.	A word arbitrarily created as the name of a bacterial genus	0.667091
Sexagatrix	fem. n.	A word arbitrarily created as the name of a bacterial genus	0.612651
Vehementia	fem. n.	A word arbitrarily created as the name of a bacterial genus	0.677069
Fraudeptis	fem. n.	A word arbitrarily created as the name of a bacterial genus	0.409767
Panegetica	fem. n.	A word arbitrarily created as the name of a bacterial genus	0.261033
Scrobectio	fem. n.	A word arbitrarily created as the name of a bacterial genus	0.662988
Isthmaria	fem. n.	A word arbitrarily created as the name of a bacterial genus	0.0921143
Laxusilago	fem. n.	A word arbitrarily created as the name of a bacterial genus	0.0351817
Chalbella	fem. n.	A word arbitrarily created as the name of a bacterial genus	0.426459
Medicutela	fem. n.	A word arbitrarily created as the name of a bacterial genus	0.497404
Advineptis	fem. n.	A word arbitrarily created as the name of a bacterial genus	0.562828
Pragmia	fem. n.	A word arbitrarily created as the name of a bacterial genus	0.0365283
Paeanetica	fem. n.	A word arbitrarily created as the name of a bacterial genus	0.972418
Dedicatrix	fem. n.	A word arbitrarily created as the name of a bacterial genus	0.774708
Titilascua	fem. n.	A word arbitrarily created as the name of a bacterial genus	0.3395
Coracilago	fem. n.	A word arbitrarily created as the name of a bacterial genus	0.674071
Adagneptis	fem. n.	A word arbitrarily created as the name of a bacterial genus	0.715287
Nicomutela	fem. n.	A word arbitrarily created as the name of a bacterial genus	0.816461
Memorilago	fem. n.	A word arbitrarily created as the name of a bacterial genus	0.156247
Cymatatrix	fem. n.	A word arbitrarily created as the name of a bacterial genus	0.924768
Adjacella	fem. n.	A word arbitrarily created as the name of a bacterial genus	0.300434
Abascellio	fem. n.	A word arbitrarily created as the name of a bacterial genus	0.790744
Panacectio	fem. n.	A word arbitrarily created as the name of a bacterial genus	0.379312
Diponutela	fem. n.	A word arbitrarily created as the name of a bacterial genus	0.479112
Sempreptis	fem. n.	A word arbitrarily created as the name of a bacterial genus	0.794781
Mobilectio	fem. n.	A word arbitrarily created as the name of a bacterial genus	0.608183
Fucosetica	fem. n.	A word arbitrarily created as the name of a bacterial genus	0.792661
Aratritas	fem. n.	A word arbitrarily created as the name of a bacterial genus	0.152431
Alvarellio	fem. n.	A word arbitrarily created as the name of a bacterial genus	0.748796
Faginectio	fem. n.	A word arbitrarily created as the name of a bacterial genus	0.526131
Brabraria	fem. n.	A word arbitrarily created as the name of a bacterial genus	0.344693
Quassiquia	fem. n.	A word arbitrarily created as the name of a bacterial genus	0.998895
Avuncella	fem. n.	A word arbitrarily created as the name of a bacterial genus	0.956405
Euripitudo	fem. n.	A word arbitrarily created as the name of a bacterial genus	0.499068
Sereniquia	fem. n.	A word arbitrarily created as the name of a bacterial genus	0.780899
Popanagena	fem. n.	A word arbitrarily created as the name of a bacterial genus	0.724909
Remedagena	fem. n.	A word arbitrarily created as the name of a bacterial genus	0.390691
Coordactea	fem. n.	A word arbitrarily created as the name of a bacterial genus	0.57186
Bibalilago	fem. n.	A word arbitrarily created as the name of a bacterial genus	0.0653219
Trochella	fem. n.	A word arbitrarily created as the name of a bacterial genus	0.897979
Apsegutela	fem. n.	A word arbitrarily created as the name of a bacterial genus	0.0648175
Togatitas	fem. n.	A word arbitrarily created as the name of a bacterial genus	0.874818
Cabaladema	fem. n.	A word arbitrarily created as the name of a bacterial genus	0.450967
Citaraphia	fem. n.	A word arbitrarily created as the name of a bacterial genus	0.0164965
Conyzellio	fem. n.	A word arbitrarily created as the name of a bacterial genus	0.280497
Deseciquia	fem. n.	A word arbitrarily created as the name of a bacterial genus	0.543324
Achororea	fem. n.	A word arbitrarily created as the name of a bacterial genus	0.0327943
Momenitas	fem. n.	A word arbitrarily created as the name of a bacterial genus	0.391181
Angeleptis	fem. n.	A word arbitrarily created as the name of a bacterial genus	0.220391
Tinusaria	fem. n.	A word arbitrarily created as the name of a bacterial genus	0.988405
Ferenectio	fem. n.	A word arbitrarily created as the name of a bacterial genus	0.3378
Bucelaphia	fem. n.	A word arbitrarily created as the name of a bacterial genus	0.546363
Dilogella	fem. n.	A word arbitrarily created as the name of a bacterial genus	0.260657
Panaciquia	fem. n.	A word arbitrarily created as the name of a bacterial genus	0.289005
Mosesilago	fem. n.	A word arbitrarily created as the name of a bacterial genus	0.389454
Ducenectio	fem. n.	A word arbitrarily created as the name of a bacterial genus	0.553419
Bistriquia	fem. n.	A word arbitrarily created as the name of a bacterial genus	0.248612
Cenchatrix	fem. n.	A word arbitrarily created as the name of a bacterial genus	0.585457
Acredaria	fem. n.	A word arbitrarily created as the name of a bacterial genus	0.078352
Vagusectio	fem. n.	A word arbitrarily created as the name of a bacterial genus	0.65101
Strabentia	fem. n.	A word arbitrarily created as the name of a bacterial genus	0.327466
Arrabatrix	fem. n.	A word arbitrarily created as the name of a bacterial genus	0.201044
Galacitas	fem. n.	A word arbitrarily created as the name of a bacterial genus	0.29106
Brattaphia	fem. n.	A word arbitrarily created as the name of a bacterial genus	0.946526
Merenellio	fem. n.	A word arbitrarily created as the name of a bacterial genus	0.709491
Eugenitudo	fem. n.	A word arbitrarily created as the name of a bacterial genus	0.342257
Coassadema	fem. n.	A word arbitrarily created as the name of a bacterial genus	0.68278
Aptatectio	fem. n.	A word arbitrarily created as the name of a bacterial genus	0.76782
Bijugagena	fem. n.	A word arbitrarily created as the name of a bacterial genus	0.797459
Digerarisa	fem. n.	A word arbitrarily created as the name of a bacterial genus	0.989631
Atrusarisa	fem. n.	A word arbitrarily created as the name of a bacterial genus	0.00305797
Amygditas	fem. n.	A word arbitrarily created as the name of a bacterial genus	0.911034
Laboriquia	fem. n.	A word arbitrarily created as the name of a bacterial genus	0.232086
Geronella	fem. n.	A word arbitrarily created as the name of a bacterial genus	0.0597206
Bicoditudo	fem. n.	A word arbitrarily created as the name of a bacterial genus	0.825277
Bolareptis	fem. n.	A word arbitrarily created as the name of a bacterial genus	0.754009
Pseudorea	fem. n.	A word arbitrarily created as the name of a bacterial genus	0.715675
Scaenorea	fem. n.	A word arbitrarily created as the name of a bacterial genus	0.188801
Amurcarisa	fem. n.	A word arbitrarily created as the name of a bacterial genus	0.0897156
Anxifagena	fem. n.	A word arbitrarily created as the name of a bacterial genus	0.449469
Rubeceptis	fem. n.	A word arbitrarily created as the name of a bacterial genus	0.508043
Pergriquia	fem. n.	A word arbitrarily created as the name of a bacterial genus	0.668308
Noxalagena	fem. n.	A word arbitrarily created as the name of a bacterial genus	0.884381
Roraractea	fem. n.	A word arbitrarily created as the name of a bacterial genus	0.249214
Huciaatrix	fem. n.	A word arbitrarily created as the name of a bacterial genus	0.567372
Uncusentia	fem. n.	A word arbitrarily created as the name of a bacterial genus	0.71279
Atermascua	fem. n.	A word arbitrarily created as the name of a bacterial genus	0.784821
Aerucactea	fem. n.	A word arbitrarily created as the name of a bacterial genus	0.943602
Splenectio	fem. n.	A word arbitrarily created as the name of a bacterial genus	0.703613
Threcascua	fem. n.	A word arbitrarily created as the name of a bacterial genus	0.494399
Ensicectio	fem. n.	A word arbitrarily created as the name of a bacterial genus	0.13615
Motetentia	fem. n.	A word arbitrarily created as the name of a bacterial genus	0.646787
Ceparaphia	fem. n.	A word arbitrarily created as the name of a bacterial genus	0.783035
Adnaadema	fem. n.	A word arbitrarily created as the name of a bacterial genus	0.854895
Oportaphia	fem. n.	A word arbitrarily created as the name of a bacterial genus	0.0933902
Effasectio	fem. n.	A word arbitrarily created as the name of a bacterial genus	0.502052
Tonelagena	fem. n.	A word arbitrarily created as the name of a bacterial genus	0.218312
Bilibetica	fem. n.	A word arbitrarily created as the name of a bacterial genus	0.269977
Bibonatrix	fem. n.	A word arbitrarily created as the name of a bacterial genus	0.412663
Emmanagena	fem. n.	A word arbitrarily created as the name of a bacterial genus	0.119076
Aborsaphia	fem. n.	A word arbitrarily created as the name of a bacterial genus	0.478344
Erythascua	fem. n.	A word arbitrarily created as the name of a bacterial genus	0.16333
Nosocicula	fem. n.	A word arbitrarily created as the name of a bacterial genus	0.480117
Ornusentia	fem. n.	A word arbitrarily created as the name of a bacterial genus	0.473613
Proscorea	fem. n.	A word arbitrarily created as the name of a bacterial genus	0.633355
Arrabitas	fem. n.	A word arbitrarily created as the name of a bacterial genus	0.638009
Rarusadema	fem. n.	A word arbitrarily created as the name of a bacterial genus	0.85988
Alephatrix	fem. n.	A word arbitrarily created as the name of a bacterial genus	0.0958655
Aborsectio	fem. n.	A word arbitrarily created as the name of a bacterial genus	0.905368
Bajoliquia	fem. n.	A word arbitrarily created as the name of a bacterial genus	0.751285
Epiphicula	fem. n.	A word arbitrarily created as the name of a bacterial genus	0.28641
Rufulorea	fem. n.	A word arbitrarily created as the name of a bacterial genus	0.437367
Thyinagena	fem. n.	A word arbitrarily created as the name of a bacterial genus	0.0315269
Cybicaphia	fem. n.	A word arbitrarily created as the name of a bacterial genus	0.709855
Bugelella	fem. n.	A word arbitrarily created as the name of a bacterial genus	0.881348
Nitedia	fem. n.	A word arbitrarily created as the name of a bacterial genus	0.649403
Amnenatrix	fem. n.	A word arbitrarily created as the name of a bacterial genus	0.359449
Rufulellio	fem. n.	A word arbitrarily created as the name of a bacterial genus	0.982931
Bugonella	fem. n.	A word arbitrarily created as the name of a bacterial genus	0.0239356
Fylacilago	fem. n.	A word arbitrarily created as the name of a bacterial genus	0.180532
Adsecatrix	fem. n.	A word arbitrarily created as the name of a bacterial genus	0.5326
Utpotagena	fem. n.	A word arbitrarily created as the name of a bacterial genus	0.399864
Prophia	fem. n.	A word arbitrarily created as the name of a bacterial genus	0.500763
Actinatrix	fem. n.	A word arbitrarily created as the name of a bacterial genus	0.996743
Sycomia	fem. n.	A word arbitrarily created as the name of a bacterial genus	0.557765
Inustetica	fem. n.	A word arbitrarily created as the name of a bacterial genus	0.659808
Furoractea	fem. n.	A word arbitrarily created as the name of a bacterial genus	0.447215
Subobutela	fem. n.	A word arbitrarily created as the name of a bacterial genus	0.96959
Eparciquia	fem. n.	A word arbitrarily created as the name of a bacterial genus	0.735678
Celuleptis	fem. n.	A word arbitrarily created as the name of a bacterial genus	0.78415
Dosisitas	fem. n.	A word arbitrarily created as the name of a bacterial genus	0.540675
Nitoractea	fem. n.	A word arbitrarily created as the name of a bacterial genus	0.31364
Priscilago	fem. n.	A word arbitrarily created as the name of a bacterial genus	0.532291
Caledarisa	fem. n.	A word arbitrarily created as the name of a bacterial genus	0.425103
Cisthiquia	fem. n.	A word arbitrarily created as the name of a bacterial genus	0.751028
Hydolorea	fem. n.	A word arbitrarily created as the name of a bacterial genus	0.886324
Refocectio	fem. n.	A word arbitrarily created as the name of a bacterial genus	0.387905
Sinaitas	fem. n.	A word arbitrarily created as the name of a bacterial genus	0.889044
Scribactea	fem. n.	A word arbitrarily created as the name of a bacterial genus	0.0525943
Favusella	fem. n.	A word arbitrarily created as the name of a bacterial genus	0.704648
Favilentia	fem. n.	A word arbitrarily created as the name of a bacterial genus	0.0117657
Irrecatrix	fem. n.	A word arbitrarily created as the name of a bacterial genus	0.876036
Identella	fem. n.	A word arbitrarily created as the name of a bacterial genus	0.393607
Remoritas	fem. n.	A word arbitrarily created as the name of a bacterial genus	0.433432
Idipsitas	fem. n.	A word arbitrarily created as the name of a bacterial genus	0.730382
Depolactea	fem. n.	A word arbitrarily created as the name of a bacterial genus	0.716565
Eternitas	fem. n.	A word arbitrarily created as the name of a bacterial genus	0.999975
Nugacentia	fem. n.	A word arbitrarily created as the name of a bacterial genus	0.585291
Articicula	fem. n.	A word arbitrarily created as the name of a bacterial genus	0.369992
Ferctilago	fem. n.	A word arbitrarily created as the name of a bacterial genus	0.869979
Delocicula	fem. n.	A word arbitrarily created as the name of a bacterial genus	0.959845
Sudoragena	fem. n.	A word arbitrarily created as the name of a bacterial genus	0.186603
Cadavutela	fem. n.	A word arbitrarily created as the name of a bacterial genus	0.130211
Eurocellio	fem. n.	A word arbitrarily created as the name of a bacterial genus	0.933797
Forenentia	fem. n.	A word arbitrarily created as the name of a bacterial genus	0.634777
Amygdaria	fem. n.	A word arbitrarily created as the name of a bacterial genus	0.0514974
Hesititas	fem. n.	A word arbitrarily created as the name of a bacterial genus	0.525994
Docaia	fem. n.	A word arbitrarily created as the name of a bacterial genus	0.0808517
Diaulicula	fem. n.	A word arbitrarily created as the name of a bacterial genus	0.574542
Fodorectio	fem. n.	A word arbitrarily created as the name of a bacterial genus	0.927523
Metucascua	fem. n.	A word arbitrarily created as the name of a bacterial genus	0.952388
Virecentia	fem. n.	A word arbitrarily created as the name of a bacterial genus	0.388414
Copulectio	fem. n.	A word arbitrarily created as the name of a bacterial genus	0.158919
Luticorea	fem. n.	A word arbitrarily created as the name of a bacterial genus	0.897671
Resaicula	fem. n.	A word arbitrarily created as the name of a bacterial genus	0.609134
Euseborea	fem. n.	A word arbitrarily created as the name of a bacterial genus	0.173966
Mobilitas	fem. n.	A word arbitrarily created as the name of a bacterial genus	0.483144
Majaiquia	fem. n.	A word arbitrarily created as the name of a bacterial genus	0.171278
Blandellio	fem. n.	A word arbitrarily created as the name of a bacterial genus	0.281106
Blendaria	fem. n.	A word arbitrarily created as the name of a bacterial genus	0.925398
Distritas	fem. n.	A word arbitrarily created as the name of a bacterial genus	0.519582
Expecectio	fem. n.	A word arbitrarily created as the name of a bacterial genus	0.270657
Perscitas	fem. n.	A word arbitrarily created as the name of a bacterial genus	0.504633
Reapsitudo	fem. n.	A word arbitrarily created as the name of a bacterial genus	0.83768
Purifascua	fem. n.	A word arbitrarily created as the name of a bacterial genus	0.886721
Socerascua	fem. n.	A word arbitrarily created as the name of a bacterial genus	0.476755
Arsineptis	fem. n.	A word arbitrarily created as the name of a bacterial genus	0.737996
Seseletica	fem. n.	A word arbitrarily created as the name of a bacterial genus	0.402695
Attacatrix	fem. n.	A word arbitrarily created as the name of a bacterial genus	0.770999
Depubentia	fem. n.	A word arbitrarily created as the name of a bacterial genus	0.780085
Defugaria	fem. n.	A word arbitrarily created as the name of a bacterial genus	0.00966922
Adtonectio	fem. n.	A word arbitrarily created as the name of a bacterial genus	0.570794
Volitiquia	fem. n.	A word arbitrarily created as the name of a bacterial genus	0.58435
Scintagena	fem. n.	A word arbitrarily created as the name of a bacterial genus	0.27178
Hecateptis	fem. n.	A word arbitrarily created as the name of a bacterial genus	0.113791
Nominia	fem. n.	A word arbitrarily created as the name of a bacterial genus	0.878642
Redimutela	fem. n.	A word arbitrarily created as the name of a bacterial genus	0.780163
Ramaliquia	fem. n.	A word arbitrarily created as the name of a bacterial genus	0.897996
Fenicactea	fem. n.	A word arbitrarily created as the name of a bacterial genus	0.107368
Triaadema	fem. n.	A word arbitrarily created as the name of a bacterial genus	0.459675
Diaspicula	fem. n.	A word arbitrarily created as the name of a bacterial genus	0.281656
Usualarisa	fem. n.	A word arbitrarily created as the name of a bacterial genus	0.806832
Aurefetica	fem. n.	A word arbitrarily created as the name of a bacterial genus	0.242334
Adhucaria	fem. n.	A word arbitrarily created as the name of a bacterial genus	0.0262172
Repuborea	fem. n.	A word arbitrarily created as the name of a bacterial genus	0.982139
Turunellio	fem. n.	A word arbitrarily created as the name of a bacterial genus	0.707138
Adhibatrix	fem. n.	A word arbitrarily created as the name of a bacterial genus	0.0963224
Refecilago	fem. n.	A word arbitrarily created as the name of a bacterial genus	0.429882
Togatectio	fem. n.	A word arbitrarily created as the name of a bacterial genus	0.805468
Diarraphia	fem. n.	A word arbitrarily created as the name of a bacterial genus	0.504439
Labyrascua	fem. n.	A word arbitrarily created as the name of a bacterial genus	0.941167
Mimogella	fem. n.	A word arbitrarily created as the name of a bacterial genus	0.61873
Sycometica	fem. n.	A word arbitrarily created as the name of a bacterial genus	0.816396
Salicorea	fem. n.	A word arbitrarily created as the name of a bacterial genus	0.36853
Eulogectio	fem. n.	A word arbitrarily created as the name of a bacterial genus	0.615933
Cotulorea	fem. n.	A word arbitrarily created as the name of a bacterial genus	0.420705
Telecectio	fem. n.	A word arbitrarily created as the name of a bacterial genus	0.209099
Ansaratrix	fem. n.	A word arbitrarily created as the name of a bacterial genus	0.387395
Telonarisa	fem. n.	A word arbitrarily created as the name of a bacterial genus	0.641698
Silicarisa	fem. n.	A word arbitrarily created as the name of a bacterial genus	0.275866
Innabiquia	fem. n.	A word arbitrarily created as the name of a bacterial genus	0.662593
Pelexectio	fem. n.	A word arbitrarily created as the name of a bacterial genus	0.676607
Soricitudo	fem. n.	A word arbitrarily created as the name of a bacterial genus	0.319075
Elingia	fem. n.	A word arbitrarily created as the name of a bacterial genus	0.18221
Vimenagena	fem. n.	A word arbitrarily created as the name of a bacterial genus	0.0881333
Generorea	fem. n.	A word arbitrarily created as the name of a bacterial genus	0.965524
Psylleptis	fem. n.	A word arbitrarily created as the name of a bacterial genus	0.390891
Cluacitudo	fem. n.	A word arbitrarily created as the name of a bacterial genus	0.488261
Dampnaria	fem. n.	A word arbitrarily created as the name of a bacterial genus	0.258325
Auxilatrix	fem. n.	A word arbitrarily created as the name of a bacterial genus	0.935375
Eunuciquia	fem. n.	A word arbitrarily created as the name of a bacterial genus	0.839308
Evestella	fem. n.	A word arbitrarily created as the name of a bacterial genus	0.648933
Peponicula	fem. n.	A word arbitrarily created as the name of a bacterial genus	0.523137
Innabactea	fem. n.	A word arbitrarily created as the name of a bacterial genus	0.811327
Metucitudo	fem. n.	A word arbitrarily created as the name of a bacterial genus	0.919731
Lupanactea	fem. n.	A word arbitrarily created as the name of a bacterial genus	0.0956846
Achetaphia	fem. n.	A word arbitrarily created as the name of a bacterial genus	0.956976
Mituladema	fem. n.	A word arbitrarily created as the name of a bacterial genus	0.150744
Ptongadema	fem. n.	A word arbitrarily created as the name of a bacterial genus	0.410345
Danusitas	fem. n.	A word arbitrarily created as the name of a bacterial genus	0.475412
Aptotadema	fem. n.	A word arbitrarily created as the name of a bacterial genus	0.308508
Camelectio	fem. n.	A word arbitrarily created as the name of a bacterial genus	0.436578
Dotaletica	fem. n.	A word arbitrarily created as the name of a bacterial genus	0.0251473
Itemiia	fem. n.	A word arbitrarily created as the name of a bacterial genus	0.470735
Cibicadema	fem. n.	A word arbitrarily created as the name of a bacterial genus	0.39339
Equidactea	fem. n.	A word arbitrarily created as the name of a bacterial genus	0.447018
Gressagena	fem. n.	A word arbitrarily created as the name of a bacterial genus	0.715161
Toralitudo	fem. n.	A word arbitrarily created as the name of a bacterial genus	0.61935
Eurusascua	fem. n.	A word arbitrarily created as the name of a bacterial genus	0.970623
Mineradema	fem. n.	A word arbitrarily created as the name of a bacterial genus	0.520241
Penaradema	fem. n.	A word arbitrarily created as the name of a bacterial genus	0.439787
Gasifeptis	fem. n.	A word arbitrarily created as the name of a bacterial genus	0.627522
Hiemparisa	fem. n.	A word arbitrarily created as the name of a bacterial genus	0.643428
Cneorutela	fem. n.	A word arbitrarily created as the name of a bacterial genus	0.0190849
Aplysaphia	fem. n.	A word arbitrarily created as the name of a bacterial genus	0.459954
Traexutela	fem. n.	A word arbitrarily created as the name of a bacterial genus	0.81543
Tunelatrix	fem. n.	A word arbitrarily created as the name of a bacterial genus	0.418371
Amatrarisa	fem. n.	A word arbitrarily created as the name of a bacterial genus	0.196046
Dysenaphia	fem. n.	A word arbitrarily created as the name of a bacterial genus	0.971505
Sagacicula	fem. n.	A word arbitrarily created as the name of a bacterial genus	0.0889583
Rosetella	fem. n.	A word arbitrarily created as the name of a bacterial genus	0.561471
Ermeliquia	fem. n.	A word arbitrarily created as the name of a bacterial genus	0.243776
Pomosorea	fem. n.	A word arbitrarily created as the name of a bacterial genus	0.583231
Rabulatrix	fem. n.	A word arbitrarily created as the name of a bacterial genus	0.824423
Digamarisa	fem. n.	A word arbitrarily created as the name of a bacterial genus	0.0801932
Amoebiquia	fem. n.	A word arbitrarily created as the name of a bacterial genus	0.47929
Amethicula	fem. n.	A word arbitrarily created as the name of a bacterial genus	0.568414
Dihesatrix	fem. n.	A word arbitrarily created as the name of a bacterial genus	0.239122
Echenagena	fem. n.	A word arbitrarily created as the name of a bacterial genus	0.437963
Opsecorea	fem. n.	A word arbitrarily created as the name of a bacterial genus	0.180539
Antebitudo	fem. n.	A word arbitrarily created as the name of a bacterial genus	0.834853
Tuburutela	fem. n.	A word arbitrarily created as the name of a bacterial genus	0.673672
Adcoladema	fem. n.	A word arbitrarily created as the name of a bacterial genus	0.22511
Necubellio	fem. n.	A word arbitrarily created as the name of a bacterial genus	0.180951
Laxusarisa	fem. n.	A word arbitrarily created as the name of a bacterial genus	0.129096
Euresiquia	fem. n.	A word arbitrarily created as the name of a bacterial genus	0.129143
Gasifactea	fem. n.	A word arbitrarily created as the name of a bacterial genus	0.293312
Victraria	fem. n.	A word arbitrarily created as the name of a bacterial genus	0.604858
Auceleptis	fem. n.	A word arbitrarily created as the name of a bacterial genus	0.114677
Encolorea	fem. n.	A word arbitrarily created as the name of a bacterial genus	0.0785192
Manasellio	fem. n.	A word arbitrarily created as the name of a bacterial genus	0.230733
Crispectio	fem. n.	A word arbitrarily created as the name of a bacterial genus	0.343262
Theuriquia	fem. n.	A word arbitrarily created as the name of a bacterial genus	0.992634
Opticectio	fem. n.	A word arbitrarily created as the name of a bacterial genus	0.714673
Adtonadema	fem. n.	A word arbitrarily created as the name of a bacterial genus	0.148938
Inopsentia	fem. n.	A word arbitrarily created as the name of a bacterial genus	0.26188
Obsecella	fem. n.	A word arbitrarily created as the name of a bacterial genus	0.0585982
Harenetica	fem. n.	A word arbitrarily created as the name of a bacterial genus	0.58807
Chutharia	fem. n.	A word arbitrarily created as the name of a bacterial genus	0.930193
Caulella	fem. n.	A word arbitrarily created as the name of a bacterial genus	0.0782228
Extasascua	fem. n.	A word arbitrarily created as the name of a bacterial genus	0.544141
Pelexitudo	fem. n.	A word arbitrarily created as the name of a bacterial genus	0.239679
Inmiseptis	fem. n.	A word arbitrarily created as the name of a bacterial genus	0.134453
Irraia	fem. n.	A word arbitrarily created as the name of a bacterial genus	0.0403476
Emuncia	fem. n.	A word arbitrarily created as the name of a bacterial genus	0.685327
Coticeptis	fem. n.	A word arbitrarily created as the name of a bacterial genus	0.0752045
Veracitudo	fem. n.	A word arbitrarily created as the name of a bacterial genus	0.729796
Gemebarisa	fem. n.	A word arbitrarily created as the name of a bacterial genus	0.321246
Manomicula	fem. n.	A word arbitrarily created as the name of a bacterial genus	0.506518
Vitelitudo	fem. n.	A word arbitrarily created as the name of a bacterial genus	0.26087
Cybicectio	fem. n.	A word arbitrarily created as the name of a bacterial genus	0.997668
Carecitas	fem. n.	A word arbitrarily created as the name of a bacterial genus	0.564932
Exindarisa	fem. n.	A word arbitrarily created as the name of a bacterial genus	0.734041
Biferilago	fem. n.	A word arbitrarily created as the name of a bacterial genus	0.552945
Argemutela	fem. n.	A word arbitrarily created as the name of a bacterial genus	0.294796
Avunceptis	fem. n.	A word arbitrarily created as the name of a bacterial genus	0.771551
Felonetica	fem. n.	A word arbitrarily created as the name of a bacterial genus	0.314978
Eruptilago	fem. n.	A word arbitrarily created as the name of a bacterial genus	0.291696
Coenciquia	fem. n.	A word arbitrarily created as the name of a bacterial genus	0.381595
Ligyrascua	fem. n.	A word arbitrarily created as the name of a bacterial genus	0.519454
Decociquia	fem. n.	A word arbitrarily created as the name of a bacterial genus	0.09864
Eugenactea	fem. n.	A word arbitrarily created as the name of a bacterial genus	0.332934
Bigamadema	fem. n.	A word arbitrarily created as the name of a bacterial genus	0.0830586
Armametica	fem. n.	A word arbitrarily created as the name of a bacterial genus	0.193441
Moribeptis	fem. n.	A word arbitrarily created as the name of a bacterial genus	0.899511
Nisanilago	fem. n.	A word arbitrarily created as the name of a bacterial genus	0.658025
Reincagena	fem. n.	A word arbitrarily created as the name of a bacterial genus	0.28463
Ravenitudo	fem. n.	A word arbitrarily created as the name of a bacterial genus	0.217685
Actinaria	fem. n.	A word arbitrarily created as the name of a bacterial genus	0.387067
Sarabadema	fem. n.	A word arbitrarily created as the name of a bacterial genus	0.795398
Immedetica	fem. n.	A word arbitrarily created as the name of a bacterial genus	0.679565
Aigilatrix	fem. n.	A word arbitrarily created as the name of a bacterial genus	0.682939
Aucelaphia	fem. n.	A word arbitrarily created as the name of a bacterial genus	0.581583
Scaccarisa	fem. n.	A word arbitrarily created as the name of a bacterial genus	0.869053
Ornusaria	fem. n.	A word arbitrarily created as the name of a bacterial genus	0.675174
Audenutela	fem. n.	A word arbitrarily created as the name of a bacterial genus	0.398419
Alebricula	fem. n.	A word arbitrarily created as the name of a bacterial genus	0.338993
Mucusascua	fem. n.	A word arbitrarily created as the name of a bacterial genus	0.985313
Cerycarisa	fem. n.	A word arbitrarily created as the name of a bacterial genus	0.862853
Borititas	fem. n.	A word arbitrarily created as the name of a bacterial genus	0.982515
Cibusorea	fem. n.	A word arbitrarily created as the name of a bacterial genus	0.665688
Nosocellio	fem. n.	A word arbitrarily created as the name of a bacterial genus	0.768555
Sotuliquia	fem. n.	A word arbitrarily created as the name of a bacterial genus	0.990193
Clostitudo	fem. n.	A word arbitrarily created as the name of a bacterial genus	0.62941
Islamaphia	fem. n.	A word arbitrarily created as the name of a bacterial genus	0.357902
Obrusascua	fem. n.	A word arbitrarily created as the name of a bacterial genus	0.169255
Feralellio	fem. n.	A word arbitrarily created as the name of a bacterial genus	0.665485
Bubilitas	fem. n.	A word arbitrarily created as the name of a bacterial genus	0.739211
Ilionaphia	fem. n.	A word arbitrarily created as the name of a bacterial genus	0.936902
Divalascua	fem. n.	A word arbitrarily created as the name of a bacterial genus	0.581019
Arbusella	fem. n.	A word arbitrarily created as the name of a bacterial genus	0.785664
Lomenascua	fem. n.	A word arbitrarily created as the name of a bacterial genus	0.233833
Chalbicula	fem. n.	A word arbitrarily created as the name of a bacterial genus	0.0118249
Malicaria	fem. n.	A word arbitrarily created as the name of a bacterial genus	0.244413
Penicetica	fem. n.	A word arbitrarily created as the name of a bacterial genus	0.0288177
Confleptis	fem. n.	A word arbitrarily created as the name of a bacterial genus	0.72552
Roraritas	fem. n.	A word arbitrarily created as the name of a bacterial genus	0.799725
Nauclentia	fem. n.	A word arbitrarily created as the name of a bacterial genus	0.455231
Stipsarisa	fem. n.	A word arbitrarily created as the name of a bacterial genus	0.829437
Inridicula	fem. n.	A word arbitrarily created as the name of a bacterial genus	0.317204
Dochmicula	fem. n.	A word arbitrarily created as the name of a bacterial genus	0.093601
Pharmatrix	fem. n.	A word arbitrarily created as the name of a bacterial genus	0.254699
Pelexatrix	fem. n.	A word arbitrarily created as the name of a bacterial genus	0.754493
Polulorea	fem. n.	A word arbitrarily created as the name of a bacterial genus	0.383953
Flustentia	fem. n.	A word arbitrarily created as the name of a bacterial genus	0.928308
Lainagena	fem. n.	A word arbitrarily created as the name of a bacterial genus	0.391207
Galacorea	fem. n.	A word arbitrarily created as the name of a bacterial genus	0.135739
Latebentia	fem. n.	A word arbitrarily created as the name of a bacterial genus	0.536245
Anaphorea	fem. n.	A word arbitrarily created as the name of a bacterial genus	0.454516
Herodentia	fem. n.	A word arbitrarily created as the name of a bacterial genus	0.0324907
Arcubilago	fem. n.	A word arbitrarily created as the name of a bacterial genus	0.868759
Balenatrix	fem. n.	A word arbitrarily created as the name of a bacterial genus	0.592124
Incogadema	fem. n.	A word arbitrarily created as the name of a bacterial genus	0.71426
Anecliquia	fem. n.	A word arbitrarily created as the name of a bacterial genus	0.359056
Claudentia	fem. n.	A word arbitrarily created as the name of a bacterial genus	0.563585
Bibonorea	fem. n.	A word arbitrarily created as the name of a bacterial genus	0.658335
Restrella	fem. n.	A word arbitrarily created as the name of a bacterial genus	0.27014
Etholitas	fem. n.	A word arbitrarily created as the name of a bacterial genus	0.764779
Saponascua	fem. n.	A word arbitrarily created as the name of a bacterial genus	0.122732
Traexitudo	fem. n.	A word arbitrarily created as the name of a bacterial genus	0.845466
Vigiladema	fem. n.	A word arbitrarily created as the name of a bacterial genus	0.934056
Porthiquia	fem. n.	A word arbitrarily created as the name of a bacterial genus	0.666269
Favusatrix	fem. n.	A word arbitrarily created as the name of a bacterial genus	0.501323
Deratadema	fem. n.	A word arbitrarily created as the name of a bacterial genus	0.376174
Lucararisa	fem. n.	A word arbitrarily created as the name of a bacterial genus	0.789291
Problatrix	fem. n.	A word arbitrarily created as the name of a bacterial genus	0.744753
Clepsia	fem. n.	A word arbitrarily created as the name of a bacterial genus	0.83277
Delebatrix	fem. n.	A word arbitrarily created as the name of a bacterial genus	0.283572
Endivorea	fem. n.	A word arbitrarily created as the name of a bacterial genus	0.918221
Scaphicula	fem. n.	A word arbitrarily created as the name of a bacterial genus	0.828387
Agalmella	fem. n.	A word arbitrarily created as the name of a bacterial genus	0.584563
Advecitas	fem. n.	A word arbitrarily created as the name of a bacterial genus	0.667742
Ampolarisa	fem. n.	A word arbitrarily created as the name of a bacterial genus	0.154821
Diiamorea	fem. n.	A word arbitrarily created as the name of a bacterial genus	0.207865
Aethractea	fem. n.	A word arbitrarily created as the name of a bacterial genus	0.756072
Vasaaria	fem. n.	A word arbitrarily created as the name of a bacterial genus	0.606232
Quartiquia	fem. n.	A word arbitrarily created as the name of a bacterial genus	0.0508321
Menaputela	fem. n.	A word arbitrarily created as the name of a bacterial genus	0.626065
Arianilago	fem. n.	A word arbitrarily created as the name of a bacterial genus	0.836322
Citusiquia	fem. n.	A word arbitrarily created as the name of a bacterial genus	0.0702091
Fagotactea	fem. n.	A word arbitrarily created as the name of a bacterial genus	0.916701
Tinusarisa	fem. n.	A word arbitrarily created as the name of a bacterial genus	0.0783898
Tresvagena	fem. n.	A word arbitrarily created as the name of a bacterial genus	0.385514
Trophentia	fem. n.	A word arbitrarily created as the name of a bacterial genus	0.541088
Funicilago	fem. n.	A word arbitrarily created as the name of a bacterial genus	0.533953
Annaliquia	fem. n.	A word arbitrarily created as the name of a bacterial genus	0.160486
Stercagena	fem. n.	A word arbitrarily created as the name of a bacterial genus	0.502769
Honesetica	fem. n.	A word arbitrarily created as the name of a bacterial genus	0.784832
Ephebitas	fem. n.	A word arbitrarily created as the name of a bacterial genus	0.123101
Erythilago	fem. n.	A word arbitrarily created as the name of a bacterial genus	0.744674
Murdragena	fem. n.	A word arbitrarily created as the name of a bacterial genus	0.377965
Aaatectio	fem. n.	A word arbitrarily created as the name of a bacterial genus	0.17085
Caledilago	fem. n.	A word arbitrarily created as the name of a bacterial genus	0.993437
Minoratrix	fem. n.	A word arbitrarily created as the name of a bacterial genus	0.234447
Spartagena	fem. n.	A word arbitrarily created as the name of a bacterial genus	0.188776
Arnacectio	fem. n.	A word arbitrarily created as the name of a bacterial genus	0.476887
Lomeniquia	fem. n.	A word arbitrarily created as the name of a bacterial genus	0.304107
Effasiquia	fem. n.	A word arbitrarily created as the name of a bacterial genus	0.595932
Quinciquia	fem. n.	A word arbitrarily created as the name of a bacterial genus	0.827339
Grallorea	fem. n.	A word arbitrarily created as the name of a bacterial genus	0.207466
Rorarellio	fem. n.	A word arbitrarily created as the name of a bacterial genus	0.0279683
Colegaria	fem. n.	A word arbitrarily created as the name of a bacterial genus	0.711639
Petuliquia	fem. n.	A word arbitrarily created as the name of a bacterial genus	0.596309
Cedeneptis	fem. n.	A word arbitrarily created as the name of a bacterial genus	0.462513
Biselatrix	fem. n.	A word arbitrarily created as the name of a bacterial genus	0.282773
Inpeditas	fem. n.	A word arbitrarily created as the name of a bacterial genus	0.257205
Aenulitudo	fem. n.	A word arbitrarily created as the name of a bacterial genus	0.699292
Miseliquia	fem. n.	A word arbitrarily created as the name of a bacterial genus	0.000668467
Ventrorea	fem. n.	A word arbitrarily created as the name of a bacterial genus	0.0773753
Bicepetica	fem. n.	A word arbitrarily created as the name of a bacterial genus	0.463282
Salacitudo	fem. n.	A word arbitrarily created as the name of a bacterial genus	0.415953
Faacascua	fem. n.	A word arbitrarily created as the name of a bacterial genus	0.318034
Alythilago	fem. n.	A word arbitrarily created as the name of a bacterial genus	0.656125
Ociorutela	fem. n.	A word arbitrarily created as the name of a bacterial genus	0.923973
Onustaphia	fem. n.	A word arbitrarily created as the name of a bacterial genus	0.984515
Secesorea	fem. n.	A word arbitrarily created as the name of a bacterial genus	0.403209
Obsidadema	fem. n.	A word arbitrarily created as the name of a bacterial genus	0.0996355
Inforectio	fem. n.	A word arbitrarily created as the name of a bacterial genus	0.980687
Elangitudo	fem. n.	A word arbitrarily created as the name of a bacterial genus	0.436233
Romulitudo	fem. n.	A word arbitrarily created as the name of a bacterial genus	0.908558
Buselitudo	fem. n.	A word arbitrarily created as the name of a bacterial genus	0.84343
Calicitas	fem. n.	A word arbitrarily created as the name of a bacterial genus	0.309498
Seraaphia	fem. n.	A word arbitrarily created as the name of a bacterial genus	0.567695
Phaeditudo	fem. n.	A word arbitrarily created as the name of a bacterial genus	0.892764
Renunadema	fem. n.	A word arbitrarily created as the name of a bacterial genus	0.00264619
Zenitetica	fem. n.	A word arbitrarily created as the name of a bacterial genus	0.470878
Almonitudo	fem. n.	A word arbitrarily created as the name of a bacterial genus	0.542297
Forailago	fem. n.	A word arbitrarily created as the name of a bacterial genus	0.865321
Ervilaria	fem. n.	A word arbitrarily created as the name of a bacterial genus	0.605574
Lexicagena	fem. n.	A word arbitrarily created as the name of a bacterial genus	0.484633
Simenatrix	fem. n.	A word arbitrarily created as the name of a bacterial genus	0.881192
Diurnagena	fem. n.	A word arbitrarily created as the name of a bacterial genus	0.207609
Clancilago	fem. n.	A word arbitrarily created as the name of a bacterial genus	0.344555
Trigleptis	fem. n.	A word arbitrarily created as the name of a bacterial genus	0.623237
Melicitas	fem. n.	A word arbitrarily created as the name of a bacterial genus	0.105295
Inambadema	fem. n.	A word arbitrarily created as the name of a bacterial genus	0.811264
Hapalutela	fem. n.	A word arbitrarily created as the name of a bacterial genus	0.547441
Quaesiquia	fem. n.	A word arbitrarily created as the name of a bacterial genus	0.115655
Quatretica	fem. n.	A word arbitrarily created as the name of a bacterial genus	0.574457
Pomaagena	fem. n.	A word arbitrarily created as the name of a bacterial genus	0.818626
Cloacagena	fem. n.	A word arbitrarily created as the name of a bacterial genus	0.819288
Smyrnascua	fem. n.	A word arbitrarily created as the name of a bacterial genus	0.212975
Desecarisa	fem. n.	A word arbitrarily created as the name of a bacterial genus	0.404809
Admenellio	fem. n.	A word arbitrarily created as the name of a bacterial genus	0.743119
Nefanella	fem. n.	A word arbitrarily created as the name of a bacterial genus	0.699028
Synagella	fem. n.	A word arbitrarily created as the name of a bacterial genus	0.580329
Dolusicula	fem. n.	A word arbitrarily created as the name of a bacterial genus	0.183059
Inattagena	fem. n.	A word arbitrarily created as the name of a bacterial genus	0.409074
Noniaetica	fem. n.	A word arbitrarily created as the name of a bacterial genus	0.207302
Sisymetica	fem. n.	A word arbitrarily created as the name of a bacterial genus	0.0619032
Apsaitas	fem. n.	A word arbitrarily created as the name of a bacterial genus	0.356242
Megisia	fem. n.	A word arbitrarily created as the name of a bacterial genus	0.822869
Rigorilago	fem. n.	A word arbitrarily created as the name of a bacterial genus	0.387087
Gyrusascua	fem. n.	A word arbitrarily created as the name of a bacterial genus	0.818852
Abrodaria	fem. n.	A word arbitrarily created as the name of a bacterial genus	0.381032
Tribreptis	fem. n.	A word arbitrarily created as the name of a bacterial genus	0.273697
Arielagena	fem. n.	A word arbitrarily created as the name of a bacterial genus	0.0455098
Oecolaria	fem. n.	A word arbitrarily created as the name of a bacterial genus	0.421833
Adscritas	fem. n.	A word arbitrarily created as the name of a bacterial genus	0.859398
Sidusutela	fem. n.	A word arbitrarily created as the name of a bacterial genus	0.455721
Toraladema	fem. n.	A word arbitrarily created as the name of a bacterial genus	0.953811
Basicellio	fem. n.	A word arbitrarily created as the name of a bacterial genus	0.319654
abelitudo	fem. n.	A word arbitrarily created as the name of a bacterial genus	0.82982
Sodesadema	fem. n.	A word arbitrarily created as the name of a bacterial genus	0.844288
Dealbia	fem. n.	A word arbitrarily created as the name of a bacterial genus	0.697856
Angolicula	fem. n.	A word arbitrarily created as the name of a bacterial genus	0.212758
Rugosetica	fem. n.	A word arbitrarily created as the name of a bacterial genus	0.905935
Inmacella	fem. n.	A word arbitrarily created as the name of a bacterial genus	0.358508
Bimamagena	fem. n.	A word arbitrarily created as the name of a bacterial genus	0.358134
Scyphitudo	fem. n.	A word arbitrarily created as the name of a bacterial genus	0.0643421
Foculagena	fem. n.	A word arbitrarily created as the name of a bacterial genus	0.0654232
Eximiaria	fem. n.	A word arbitrarily created as the name of a bacterial genus	0.912848
Allapetica	fem. n.	A word arbitrarily created as the name of a bacterial genus	0.38969
Epastaphia	fem. n.	A word arbitrarily created as the name of a bacterial genus	0.151138
Coheretica	fem. n.	A word arbitrarily created as the name of a bacterial genus	0.933267
Chernaria	fem. n.	A word arbitrarily created as the name of a bacterial genus	0.343466
Scrobia	fem. n.	A word arbitrarily created as the name of a bacterial genus	0.0601635
Ramenetica	fem. n.	A word arbitrarily created as the name of a bacterial genus	0.0481664
Ceterentia	fem. n.	A word arbitrarily created as the name of a bacterial genus	0.772284
Adlubadema	fem. n.	A word arbitrarily created as the name of a bacterial genus	0.774477
[truncated: 72,161 more rows]

## Sheet: Initial word components
Abact
Abagm
Abant
Abasc
Abbas
Abdic
Abdom
Abduc
Abell
Aberr
Abhin
Abhor
Abieg
Abind
Abjec
Abjud
Ablac
Ableg
Ablut
Abmat
Abneg
Abnor
Abnut
Aboll
Abors
Abpat
Abrel
Abrod
Abrup
Abseg
Absid
Absoc
Abstr
Absum
Absyn
Abund
Abusq
Abyss
Acant
Acapn
Acarn
Acath
Acaun
Accan
Acced
Accid
Accol
Accub
Acent
Aceph
Acerb
Acesc
Achan
Achet
Achil
Achor
Achyn
Acies
Acisc
Aclas
Aclys
Acoen
Acont
Acorn
Acosm
Acrat
Acred
Acric
Acrob
Acruf
Actar
Actin
Actor
Actum
Acuar
Acuit
Acust
Acyst
Adact
Adaeq
Adagn
Adalg
Adapt
Adarc
Adauc
Adced
Adcol
Adcub
Addax
Adden
Addic
Adduc
Adelp
Ademp
Adeps
Adfab
Adfec
Adfic
Adger
Adhib
Adhoc
Adhuc
Adia
Adimp
Adins
Adips
Adium
Adjac
Adjec
Adjud
Adlap
Adlec
Adlib
Adloc
Adlub
Admen
Admin
Admod
Admur
Adnep
Adnix
Adnom
Adnum
Adopt
Adorn
Adpag
Adpel
Adpor
Adpul
Adrac
Adrec
Adris
Adrog
Adrum
Adscr
Adsec
Adsid
Adsoc
Adstr
Adsul
Adtac
Adten
Adtig
Adton
Adtub
Adult
Adumb
Adunc
Adusq
Advec
Advin
Advoc
Aeccl
Aecor
Aecum
Aedes
Aedic
Aedon
Aedus
Aeger
Aegid
Aegoc
Aegyp
Aelin
Aelur
Aemil
Aemul
Aenat
Aenig
Aenul
Aerac
Aeric
Aerod
Aeruc
Aesal
Aesch
Aesop
Aesth
Aesum
Aetas
Aeter
Aethr
Aetit
Aetom
Aevit
Aevum
Afann
Affab
Affec
Affic
Affor
Afran
Afric
Agalm
Agath
Agell
Agend
Agger
Agias
Agios
Aglas
Agmen
Agmin
Agnat
Agnel
Agnic
Agnom
Agnus
Agral
Agres
Agric
Agron
Agryp
Aiens
Aigil
Aizon
Alacr
Alaud
Albam
Albed
Albic
Albog
Albuc
Alcal
Alced
Alcib
Alcoh
Alear
Alebr
Alect
Alemb
Aleph
Algeb
Algid
Algor
Algus
Alias
Alien
Alioq
Alipt
Alism
Aliub
Allap
Allec
Allib
Allob
Allub
Almar
Almit
Almon
Almuc
Alnus
Alpin
Alsid
Alsul
Altan
Alter
Altic
Altor
Altum
Alumn
Alvar
Alvus
Alyss
Alyth
Amand
Amatr
Ambac
Ambec
Ambid
Ambol
Ambub
Amell
Amend
Ameth
Amfit
Amian
Amict
Aminn
Amiss
Amium
Amman
Ammen
Ammin
Ammoc
Ammur
Amnac
Amnen
Amnic
Amoeb
Amort
Amoth
Ampel
Ampol
Ampul
Amurc
Amuss
Amyct
Amygd
Amyst
Anach
Anaes
Anagl
Analp
Anamn
Ananc
Anaph
Anarc
Anasc
Anath
Anaud
Ancal
Ancel
Ancil
Ancon
Ancul
Ancyl
Andab
Anden
Anecl
Anell
Aneth
Angar
Angel
Angin
Angol
Angul
Anhel
Anhyd
Aniat
Anicl
Annal
Annex
Annic
Annon
Annuc
Ansar
Anser
Ansul
Antac
Anteb
Anthr
Antib
Antom
Anxif
Aparc
Apath
Aperc
Aphac
Aphel
Aphor
Aphth
Apiac
Apios
Apium
Aplan
Aples
Aplud
Aplys
Apoch
Apogr
Apoll
Apoph
Aposc
Apoth
Appag
Appel
Appor
Appul
Aprar
Apric
Apron
Apruc
Apseg
Apsid
Apsoc
Apstr
Apsum
Apsyc
Aptat
Apter
Aptit
Aptot
Aptus
Apuls
Aquad
Aquic
Aquol
Aquul
Arabs
Arach
Aranc
Aratr
Arbav
Arbil
Arbor
Arbus
Arcan
Arceb
Arcif
Arcos
Arcub
Ardal
Ardel
Ardif
Ardor
Ardus
Areal
Areng
Areol
Arfer
Argem
Argil
Argum
Argyr
Arhyt
Arian
Ariel
Arill
Arinc
Ariol
Arist
Arith
Armam
Armel
Armic
Armon
Armum
Arnac
Arnog
Arnus
Arpas
Arrab
Arrec
Arris
Arrog
Arrug
Arsel
Arsin
Artab
Artem
Arthr
Artic
Artoc
Artuf
Arunc
Arusp
Arval
Arver
Arvig
Arvum
Asbes
Ascal
Ascel
Ascit
Ascop
Ascyr
Asell
Asept
Asian
Aspal
Aspec
Aspil
Aspor
Assar
Assec
Assic
Assoc
Assul
Assyr
Astac
Aster
Asthm
Astic
Astol
Astul
Astyt
Asymb
Asynd
Atech
Aterm
Athen
Atlas
Atmos
Atnat
Atrac
Atric
Atroc
Atrus
Attac
Atteg
Attic
Atton
Attub
Atuat
Atver
Aucel
Aucil
Aucth
Aucup
Audac
Auden
Audit
Auger
Augin
Augur
Aulax
Aulet
Aulic
Aulon
Aulul
Aumat
Aurac
Auref
Auric
Auroc
Auruf
Austr
Ausum
Auten
Authr
Autob
Autum
Auxil
Avarc
Avell
Avens
Avern
Aviar
Avium
Avols
Avonc
Avors
Avuls
Avunc
Axill
Axiom
Axung
Babul
Babyl
Bacal
Bacch
Bacif
Bactr
Bacul
Badit
Baill
Bajol
Bajul
Balan
Balen
Balin
Baluc
Banan
Banch
Barat
Baril
Baroc
Baruc
Baryc
Basal
Basel
Basic
Batal
Bathr
Batil
Batus
Bdell
Beber
Behem
Bekah
Beliv
Belon
Bened
Benif
Beril
Berul
Beryl
Besal
Betac
Bethl
Betis
Betul
Biarc
Bibal
Biber
Bibil
Bibon
Bibul
Bical
Bicep
Bicin
Bicod
Bicub
Biden
Bienn
Bifac
Bifer
Bifid
Bifor
Bifur
Bigam
Bigem
Bigus
Bijug
Bikin
Bilan
Bilib
Biloc
Bilus
Bilyc
Bimam
Bimem
Bimot
Bimul
Binar
Binoc
Binub
Biogr
Biops
Biosp
Bioth
Bipal
Biped
Bipin
Bipun
Birem
Birot
Bisac
Bisel
Bisol
Bistr
Bisul
Bisyl
Bitum
Biver
Bivir
Blach
Blaes
Bland
Blaps
Blasp
Blatt
Blech
Blend
Bleph
Bocas
Boeth
Boius
Bolar
Bolet
Bolis
Bolon
Bolus
Bonas
Bonif
Bonon
Bonum
Borit
Bostr
Botan
Botel
Botul
Boust
Bovar
Bovic
Boxum
Brabr
Bracc
Branc
Brasm
Bratt
Bregm
Brent
Breph
Britt
Brocc
Bronc
Bruch
Brunn
Brusc
Bryon
Bubal
Bubil
Bubon
Bubul
Bucal
Bucel
Bucin
Bucol
Bucul
Bufal
Bugel
Bugil
Bugon
Bulap
Bulim
Bumam
Bumel
Bunit
Bupht
Buric
Burrh
Busel
Busyc
Butub
Butyr
Buxan
Buxet
Buxif
Buxos
Buxum
Byzan
Cabal
Cabus
Cacab
Cacem
Cachl
Cacom
Cacul
Cadav
Cadiv
Caduc
Cadyt
Caenc
Caern
Caesn
Caetr
Caiat
Calab
Caled
Calic
Calor
Calth
Calum
Calyb
Camac
Cambr
Camel
Camil
Camps
Camum
Canab
Canch
Canen
Canic
Canon
Canth
Canum
Capab
Caped
Capid
Captr
Capuc
Carab
Carch
Carec
Caric
Carol
Carph
Carth
Caruc
Casab
Casel
Casig
Castr
Casul
Catab
Catec
Catil
Catob
Catul
Cauit
Caull
Causs
Cautr
Cavam
Caver
Cavil
Cavos
Cavum
Ceden
Celam
Celeb
Celoc
Celth
Celul
Cemen
Cemos
Cenab
Cench
Cenob
Centr
Cenul
Cepar
Cepet
Cepin
Cepol
Cepul
Cerac
Cerch
Cereb
Cerim
Cerof
Ceruc
Ceryc
Cestr
Cetar
Ceter
Cetos
Cetus
Chaer
Chalb
Chanc
Chaos
Charm
Chasm
Chaus
Chern
Chian
Chium
Chlam
Chlor
Choas
Choen
Choic
Cholr
Chond
Chord
Chrem
Chris
Chrom
Chrys
Chuth
Chytr
Cibal
Cibic
Cibor
Cibus
Cicad
Cicer
Cicil
Cicon
Cicum
Cidar
Cilib
Cilot
Cimbr
Cimel
Cimin
Cinar
Cinct
Cinef
Cinif
Cinus
Cinyp
Cipus
Circl
Ciris
Cirrh
Cisal
Cisor
Cisth
Citar
Citer
Citim
Citoc
Citus
Civic
Clami
Clanc
Class
Clath
Claud
Cleon
Cleps
Clien
Clins
Cloac
Clocc
Clost
Cluac
Cluen
Clust
Clysm
Cneor
Cneph
Cnest
Cniss
Coact
Coadj
Coaeq
Coagm
Coapt
Coarc
Coass
Coauc
Cobal
Cocet
Cochl
Cocib
Cocod
Cocul
Codex
Codic
Coemp
Coenc
Coept
Coerc
Cofan
Cofin
Cogit
Cohab
Coher
Cohib
Cohor
Cohum
Coill
Coinc
Cojec
Cojux
Colaf
Coleg
Colic
Colob
Colub
Colym
Comac
Combr
Comed
Comia
Comos
Compl
Comul
Conab
Conch
Condr
Conec
Confl
Congl
Conib
Conop
Conph
Consc
Conth
Conub
Conyz
Coopt
Coord
Copad
Coper
Copis
Copon
Copul
Corac
Corch
Coric
Coroc
Corul
Coryc
Cotan
Coten
Cotic
Coton
Cotul
Cotyl
Covin
Coxen
Coxim
Coxus
Crabr
Cracc
Cramb
Crasi
Creab
Crebr
Credr
Cremn
Crept
Cresc
Creth
Cribr
Criob
Crisp
Crith
Crosm
Croys
Cruen
Cruor
Crupp
Crusm
Crypt
Cryst
Cuban
Cubic
Cubus
Cucub
Cufer
Cujas
Cujus
Culex
Culib
Cultr
Culul
Cumat
Cumer
Cumia
Cumpr
Cumul
Cunab
Cunct
Cunel
Cunic
Cunul
Cupar
Cuped
Cupid
Cupon
Cupul
Curab
Curen
Curia
Curul
Cusuc
Cutic
Cyath
Cyber
Cybic
Cybus
Cychr
Cydar
Cydon
Cylin
Cylon
Cymat
Cymin
Cymos
Cymul
Cynac
Cyneg
Cynic
Cynoc
Cypar
Cyper
Cypir
Cyren
Cyril
Cysth
Cytin
Cytop
Daduc
Dalet
Damal
Dampn
Damul
Danic
Danus
Dapal
Daphn
Dapif
Dasyp
Datar
Dativ
Dator
Datum
David
Deact
Dealb
Deamb
Deaur
Debac
Debel
Debil
Decac
Decem
Decid
Decoc
Decul
Dedec
Dedic
Dedol
Deduc
Deebr
Defal
Defec
Defic
Defor
Defug
Degen
Degul
Dehin
Dehon
Deinc
Dejec
Dejug
Delac
Deleb
Delib
Deloc
Delph
Delub
Demag
Demen
Demig
Democ
Dempt
Demug
Denar
Dendr
Denec
Denic
Denom
Denth
Denud
Deont
Deord
Depal
Depec
Depic
Depol
Depst
Depub
Depyg
Derat
Derec
Derid
Derog
Derup
Descr
Desec
Desic
Desol
Destr
Desub
Detec
Deton
Detur
Deunx
Devas
Dever
Devic
Devoc
Devus
Dextr
Diach
Diaer
Diagl
Diait
Diaph
Diarr
Diasp
Diath
Diaul
Dibap
Dicab
Dicen
Dichr
Dicib
Didac
Diduc
Didym
Diffl
Digam
Diger
Digit
Dihes
Diiam
Dijov
Dijud
Diker
Dilab
Dilec
Dilib
Dilog
Diluc
Dimac
Dimen
Dimic
Dinos
Dinum
Diocl
Dioec
Diogm
Diopt
Diphr
Dipon
Dipth
Dipyr
Dirat
Direc
Dirib
Dirum
Discr
Disel
Disgr
Disid
Displ
Distr
Disyl
Ditat
Diton
Diurn
Diusi
Dival
Diver
Divic
Divor
Divul
Dochm
Docib
Doctr
Docum
Dodec
Dolab
Dolen
Dolor
Dolus
Domab
Domes
Domic
Domun
Donar
Donum
Doryc
Dosis
Dotal
Doxol
Drach
Dragm
Drapp
Druid
Dryas
Dubit
Ducam
Ducen
Ducil
Dudum
Duell
Duisi
Dumet
Dumos
Dumus
Duoet
Dupon
Dupun
Duram
Duric
Durum
Duumv
Dynam
Dysen
Dysin
Dyspn
Eadem
Eaten
Ebisc
Eburn
Ecbas
Ecdic
Ecfat
Echen
Echid
Echog
Eclec
Eclig
Eclog
Ecnep
Econt
Ecten
Ectyp
Edent
Edict
Edius
Effas
Effec
Effic
Effor
Effug
Egens
Egest
Eglog
Egois
Egreg
Egrit
Eilet
Eject
Ejusm
Elang
Elaps
Elast
Elect
Eleem
Elenc
Eleph
Eling
Elleb
Ellip
Elops
Elumb
Elytr
Emanc
Embam
Embol
Emend
Emiss
Emman
Emort
Empat
Empir
Empor
Empyr
Emuls
Emunc
Enarm
Encen
Encol
Encyc
Endiv
Energ
Enhar
Enhyd
Enigm
Enorm
Ensic
Entit
Entom
Enucl
Enunt
Enzym
Eodem
Eosos
Eparc
Epast
Epheb
Ephip
Ephod
Epich
Epigr
Epiph
Episc
Epith
Epogd
Epops
Eques
Equid
Equul
Erect
Erept
Ergas
Erith
Ermel
Errab
Erron
Erump
Erung
Erupt
Ervil
Ervum
Eryng
Eryth
Escar
Escul
Esper
Essed
Esson
Essur
Estim
Estov
Etern
Ethec
Ethic
Ethol
Etiam
Eugen
Euhan
Eukar
Eulog
Eumin
Eunuc
Euphr
Eures
Eurip
Euroc
Eurus
Euseb
Eutyc
Evang
Evect
Event
Everr
Evest
Evict
Evulg
Exact
Exadv
Exalt
Exant
Exarc
Exasp
Exaud
Excal
Excel
Excid
Excog
Excub
Execr
Exedr
Exemp
Exerc
Exfor
Exhed
Exhib
Exhon
Eximi
Exind
Exist
Exlex
Exorc
Exost
Expal
Expec
Expol
Expug
Exsan
Exsec
Exsil
Exsom
Exstr
Exsuf
Extas
Extem
Extim
Extol
Extum
Exulc
Ezech
Fabel
Fabul
Facet
Facil
Facul
Fagin
Fagot
Fagus
Falar
Faler
Falis
Famel
Famig
Famos
Famul
Fanal
Fanul
Farin
Fatal
Fatic
Fatum
Faust
Fautr
Favil
Favon
Favus
Fecul
Fedit
Fedus
Fefic
Feles
Felic
Felon
Femel
Femin
Femor
Femur
Fenes
Fenic
Fenum
Feoff
Feral
Ferct
Feren
Feric
Feroc
Ferul
Fetid
Fetor
Fetul
Fiber
Fibic
Fibul
Ficat
Ficed
Ficul
Fidej
Fidic
Fiduc
Figil
Figul
Filet
Filic
Filtr
Filum
Fimbr
Fimum
Final
Finct
Finis
Fixat
Fixum
Flabr
Flacc
Flagr
Flamm
Fland
Flict
Flocc
Flosc
Fluct
Fluen
Fluid
Fluor
Flust
Fluus
Focal
Focul
Fodin
Fodor
Fomen
Forab
Foren
Foric
Forum
Fract
Fragl
Franc
Fratr
Fraud
Frict
Frigd
Frond
Fruct
Fruit
Frust
Fucos
Fucus
Fugax
Fugit
Fulcr
Fulic
Fumac
Fumid
Fumos
Fumus
Funal
Funct
Funeb
Funic
Funus
Furax
Furib
Furor
Furun
Fusif
Fusus
Futat
Futil
Futur
Fylac
Gabal
Gabin
Gadus
Gaius
Galac
Galer
Galil
Garum
Gasal
Gasif
Gasom
Gastr
Gasum
Gatel
Gazel
Gazof
Gehen
Gelam
Gelic
Gelum
Gemeb
Gemin
Genav
Gener
Genic
Genoc
Genum
Geoch
Geogr
Georg
Geron
Gerul
Gigan
Gimel
Glabr
Glaeb
Gland
Glauc
Gleuc
Gloss
Glott
Glutt
Gomor
Goril
Goryt
Graec
Grall
Gramm
Grand
Graph
Grass
Graul
Gress
Griff
Grill
Griph
Gross
Gruis
Grunn
Gryll
Gryph
Guarr
Guber
Guerr
Guild
Gulos
Gwerr
Gyrat
Gyrus
Habac
Haben
Habil
Hacel
Hacia
Halat
Halic
Haluc
Hamad
Hamul
Hapal
Haren
Harum
Hasdr
Hasis
Haudd
Haust
Hauti
Haven
Heben
Hecat
Heder
Hedon
Hedus
Hedyc
Hegum
Helic
Helop
Hemer
Hemic
Hemor
Heort
Hepat
Herct
Hered
Herin
Herod
Herus
Hesit
Heter
Hexag
Hexer
Hiber
Hibis
Hicia
Hiemp
Hilar
Hilum
Hinci
Hinul
Hirud
Hisop
Histr
Hiulc
Hocus
Holis
Holoc
Holus
Homag
Homic
Homog
Homul
Hones
Honor
Horal
Horeb
Horiz
Horol
Hucia
Hucus
Human
Humec
Humic
Humor
Humus
Hundr
Hutes
Hyaen
Hyber
Hydol
Hylom
Hymen
Hyosc
Hypal
Hyper
Hypoc
Hyrax
Hysop
Iacin
Ianus
Ibisc
Icter
Ictus
Idcir
Ideal
Ideir
Ident
Ideol
Idiom
Idips
Idith
Ignar
Ignic
Ignob
Iivir
Iliac
Ilict
Ilign
Ilion
Illac
Illec
Illib
Illoc
Illuc
Illyr
Imbec
Immac
Immed
Immig
Immob
Immul
Impac
Imped
Impig
Impol
Impub
Inabr
Inacc
Inadf
Inaeq
Inamb
Inanl
Inart
Inasp
Inatt
Inaud
Inbec
Incal
Incel
Incid
Incog
Incub
Indag
Indeb
Indic
Indoc
Indub
Ineff
Inemp
Inept
Inerg
Inest
Inexc
Infab
Infec
Infic
Infor
Infuc
Ingen
Ingus
Inhab
Inhon
Inhum
Injuc
Inlab
Inlec
Inlib
Inloc
Inlum
Inmac
Inmed
Inmis
Inmob
Inmun
Innab
Innec
Innoc
Innub
Inobl
Inocc
Inoff
Inops
Inord
Inpac
Inped
Inpos
Inpub
Inrad
Inrec
Inrid
Inrog
Inrum
Insal
Inscr
Insec
Insic
Insoc
Instr
Insub
Intac
Intec
Inthr
Intib
Intol
Intub
Inult
Inund
Inurb
Inust
Inval
Inven
Invic
Invol
Invul
Iogur
Ionic
Iotac
Ipsim
Irasc
Irrad
Irrec
Irrid
Irrot
Irrum
Islam
Isoch
Isosc
Israh
Istac
Isthm
Istic
Istoc
Istuc
Itemi
Ithyp
Jacob
Jacul
Jamia
Jampr
Janit
Janth
Janus
Jecur
Jejun
Jemin
Jerus
Jesus
Joann
Jobel
Jobil
Jocab
Jocin
Jocos
Jocul
Jovis
Jubar
Jubel
Jubil
Jucun
Judas
Judes
Judic
Jugal
Juger
Jugis
Jugos
Jugul
Julis
Julus
Jumen
Junct
Junip
Jupit
Juram
Jurec
Jurid
Jurul
Jusum
Juvam
Juven
Kadam
Kalat
Kalen
Kalum
Kapit
Kaput
Karth
Karus
Kataf
Labar
Labec
Labor
Labyr
Lacer
Lachr
Lacin
Lacul
Ladan
Laetr
Lagan
Lagen
Lagon
Lagun
Lamed
Lamin
Lanar
Lanif
Lanos
Lantg
Lanug
Laoph
Lapat
Lapic
Larid
Laros
Larus
Lasan
Laser
Lateb
Latib
Latom
Latus
Lavab
Laven
Laxam
Laxit
Laxus
Lazul
Leaen
Lebes
Lectr
Lecyt
Legal
Legif
Legul
Leman
Lemur
Lenim
Lenoc
Lenun
Lepas
Lepid
Lepor
Lepus
Letal
Letif
Letum
Leunc
Levam
Levic
Levor
Lexic
Libam
Libel
Libid
Libum
Libyc
Licen
Licin
Ligam
Liger
Ligul
Ligyr
Lilac
[truncated: 1,423 more rows]

## Sheet: Final word components
Nominative	Genitive	Declension of words created with this ending	Example of a Latin word with the ending
actea	acteae	1st	bractea, bracteae
adema	ademae	1st	diadema, diademae
agena	agenae	1st	adtagena, adtagenae
aphia	aphiae	1st	autobiographia, autobiographiae
aria	ariae	1st	bractiaria, bractiariae
arisa	arisae	1st	carisa, carisae
ascua	ascuae	1st	compascua, compascuae
atrix	atricis	3rd	abdicatrix, abdicatricis
ectio	ectionis	3rd	abjectio, abjectionis
ella	ellae	1st	buccella, buccellae
ellio	ellionis	3rd	bellio, bellionis
entia	entiae	1st	absentia, absentiae
eptis	eptis	3rd	abneptis, abneptis
etica	eticae	1st	aesthetica, aestheticae
ia	iae	1st	caeremonia, caeremoniae
icula	iculae	1st	acicula, aciculae
ilago	ilaginis	3rd	cartilago, cartilaginis
iquia	iquiae	1st	colliquia, colliquiae
itas	itatis	3rd	acuitas, acuitatis
itudo	itudinis	3rd	acerbitudo, acerbitudinis
orea	oreae	1st	aurea, aureae
utela	utelae	1st	cautela, cautelae
		Although creation of genus names does not require knowledge of the genitive or of the declension, this infomation is provided here in case the arbitrary names are used in compound words or in species epithets

## Sheet: Methods and Licence
Methods. Words were obtained from the LATIN-ENGLISH DICTIONARY WORDLIST Version 1.97FC from Whitaker's Words http://archives.nd.edu/whitaker/dictpage.htm. Words and dictionary entries were converted from HTML to text and then manipulated and concatenated in Microsoft Excell
Licence. These names are released for use in naming bacteria under the Creative Commons licence CC BY-NC 4.0 (https://creativecommons.org/licenses/by-nc/4.0/). Users should check that any name that they would like to use from the list has not been used before in zoology or botany and has not appeared in any other unwanted context (e.g. as a trade name or personal name) before deployment. I take n…
